# Supplementary material for: 2,5-cis-2,3,5-Trisubstituted tetrahydrofurans from the diastereomixture of 2,4-disubstituted 1,3-dioxepins via stereomutation
Source: Royal Society of Chemistry journal article supplement (doi:10.1039/c1cc12934a), 2011-01-01

## 2,5-*cis*-2,3,5-Trisubstituted tetrahydrofurans from the diastereomixture of 2,4-disubstituted 1,3-dioxepines via stereomutation

Ozora Kubo, Kenzo Yahata, Tomohiro Maegawa, and Hiromichi Fujioka\*

Graduate School of Pharmaceutical Sciences, Osaka University

1-6 Yamada-oka, Suita, Osaka 565-0871, Japan

Fax: (+81)-6-6879-8229

E-mail: fujioka@phs.osaka-u.ac.jp

### General Techniques

The  $^1\text{H}$  and  $^{13}\text{C}$  NMR spectra were measured by JEOL JNM-LA 500 or JEOL JNM-ECS 400 or JEOL JNM-AL 300 spectrometers with tetramethylsilane as an internal standard at 20-25 °C. IR spectra were recorded by Shimadzu FTIR 8400 using a diffuse reflectance measurement of samples dispersed in KBr powder. HRMS spectra were recorded by JEOL LMS-D 300 spectrometers. Merck silica gel 60 was used for column chromatography.

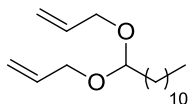

**1a:** ( $\pm$ )-CSA (1.26 g, 5.43 mmol) was added to a solution of dodecanal (5.0 g, 27.13 mmol) and allyl alcohol (9.2 mL, 136.65 mmol) in  $\text{CH}_2\text{Cl}_2$  (27 mL) at room temperature under  $\text{N}_2$ . The mixture was stirred at the same temperature for 21 h. The mixture was quenched with saturated aqueous  $\text{NaHCO}_3$  and extracted with  $\text{CH}_2\text{Cl}_2$ . The organic layer was dried over  $\text{Na}_2\text{SO}_4$ , filtered, and evaporated in vacuo. EtOH (100 mL) was added to the residue and cooled to 0°C, then  $\text{NaBH}_4$  (1.0 g, 26.43 mmol) was added to a solution. The mixture was stirred at the same temperature for 1 h. The mixture was quenched with saturated aqueous  $\text{NH}_4\text{Cl}$  and extracted with AcOEt. The organic layer was dried over  $\text{Na}_2\text{SO}_4$ , filtered, and evaporated in vacuo. The residue was purified by flash  $\text{SiO}_2$  column chromatography (hexane/AcOEt = 40/1) to give **1a** (2.87 g, 37%), colorless oil;  $^1\text{H}$  NMR (400 MHz,  $\text{CDCl}_3$ )  $\delta$ : 0.88 (3 H, t,  $J$  = 6.9 Hz), 1.26-1.38 (18 H, m), 1.62-1.67 (2H, m), 3.98-4.12 (4H, m), 4.60 (1H, t,  $J$  = 5.7 Hz), 5.15-5.18 (2H, m), 5.26-5.32 (2H, m), 5.88-5.97 (2H, m);  $^{13}\text{C}$  NMR (100 MHz,  $\text{CDCl}_3$ )  $\delta$ : 14.1, 22.7, 24.7, 29.32, 29.34, 29.42, 29.44, 29.5, 29.6, 31.9, 33.3, 66.0, 102.1, 116.6, 134.8; IR (KBr): 2924, 2855, 2249, 1466, 1038  $\text{cm}^{-1}$ ; HRMS (EI): Calcd for  $\text{C}_{18}\text{H}_{34}\text{O}_2$  ( $\text{M}^+$ ) 282.2559 found 282.2541.

## General Procedure for Preparation of Mixed Allylactal 2a-2d.

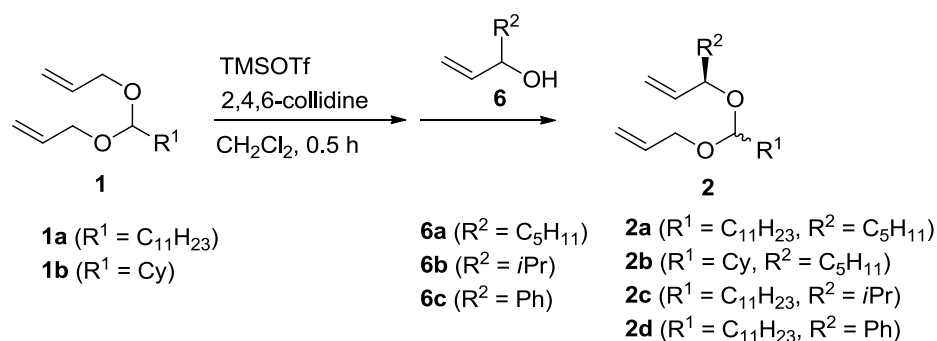

TMSOTf (2.0 equiv) was added dropwise to a solution of 2,4,6-collidine (3.0 equiv) and an acetal **1** in  $CH_2Cl_2$  (0.2 M) at 0 °C under  $N_2$ . The mixture was stirred at the same temperature. After checking disappearance of **1** on TLC, an allylcohol **6** (3.0-5.0 equiv) was added to the resulting mixture, and the solution was stirred at rt. After disappearance of the polar component on TLC, the mixture was quenched with saturated aqueous  $NaHCO_3$  and extracted with  $CH_2Cl_2$ . The organic layer was dried over  $Na_2SO_4$ , filtered, and evaporated in vacuo. The residue was purified by flash  $SiO_2$  column chromatography using neutralized  $SiO_2$  [purchased from KANTO CHEMICAL CO., INC.; Silica Gel 60 N (spherical, neutral)] to give a mixed allylactal. **1b**<sup>1</sup>, **6b**<sup>2</sup>, **12**<sup>3</sup> and (*R*)-1-(benzyloxy)but-3-en-2-ol<sup>4</sup> are known compounds. **6a**, **6c**, **13a**, **13b** and  $RuHCl(CO)(PPh_3)_3$  are commercially available.

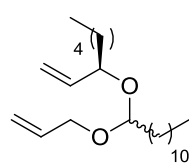

**2a** : According to the general procedure, **2a** (801.2 mg, 79%) was obtained as 4:5 (= *cis* : *trans*) of diastereomeric mixture from **1a** (811.9 mg, 2.87 mmol), TMSOTf (1.00 mL, 5.74 mmol), 2,4,6-collidine (1.14 mL, 8.62 mmol), and 1-octene-2-ol (**6a**) (1.30 mL, 8.62 mmol). Eluent: hexane/benzene= 1/1 to AcOEt. The relative stereochemistry of **2a** was determined by NOE experiments after transformation of **2a** into **4a**.

*cis*-**2a**; colorless oil;  $^1H$  NMR (400 MHz,  $CDCl_3$ )  $\delta$ : 0.88 (6H, t,  $J = 6.6$  Hz), 1.26-1.50 (26H, m), 1.57-1.64 (2H, m), 3.87 (1H, q,  $J = 6.7$  Hz), 3.92-3.97 (1H, m), 4.07-4.12 (1H, m), 4.55 (1H, t,  $J = 5.5$  Hz), 5.10-5.28 (4H, m), 5.75-5.94 (2H, m);  $^{13}C$  NMR (100 MHz,  $CDCl_3$ )  $\delta$ : 14.0, 14.1, 22.6, 22.7, 24.6, 24.8, 29.3, 29.57, 29.61, 31.8, 31.9, 34.1, 35.3, 66.1, 78.1, 101.8, 115.5, 116.4, 134.9, 139.8; IR (KBr): 2926, 2855, 1466, 1115, 1028  $cm^{-1}$ ; HRMS (EI): Calcd for  $C_{23}H_{44}O_2$  ( $M^+$ ) 352.3341, found 352.3346.

*trans*-**2a**; colorless oil;  $^1H$  NMR (400 MHz,  $CDCl_3$ )  $\delta$ : 0.88 (6H, t,  $J = 6.6$  Hz), 1.25-1.66 (28H, m), 3.97-4.03 (3H, m), 4.59 (1H, t,  $J = 5.7$  Hz), 5.13-5.18 (3H, m), 5.26-5.31 (1H, m), 5.58-5.67 (1H, m), 5.87-5.97 (1H, m);  $^{13}C$  NMR (100 MHz,  $CDCl_3$ )  $\delta$ : 14.0, 14.1, 22.6, 22.7, 24.7, 25.0, 29.3, 29.4, 29.5, 29.56, 29.60, 29.62, 31.7, 31.9, 33.8, 35.6, 64.5, 77.5, 99.9, 116.1, 116.9, 135.1, 139.2 ; IR (KBr): 2924, 2855, 1464, 1115, 1026  $cm^{-1}$ ; HRMS (EI): Calcd for  $C_{23}H_{44}O_2$  ( $M^+$ ) 352.3341, found 352.3339.

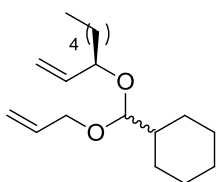

**2b** : According to the general procedure, **2b** (390 mg, 48%) was obtained as 3:4 of diastereomeric mixture from **1b** (613.0 mg, 2.91 mmol), TMSOTf (1.1 mL, 5.82 mmol), 2,4,6-collidine (1.1 mL, 8.73 mmol), and 1-octene-2-ol (**6a**) (1.3 mL, 8.73 mmol). Eluent: hexane/CH<sub>2</sub>Cl<sub>2</sub>= 2/1; colorless oil; <sup>1</sup>H NMR (400 MHz, C<sub>6</sub>D<sub>6</sub>) δ: 0.87-0.91 (3H, m), 1.03-1.77 (17H, m), 1.89-2.03 (2H, m), 3.88-4.15 (3H, m), 4.32 (3/7H, d, *J* = 6.0 Hz), 4.42 (4/7H, d, *J* = 6.9 Hz), 5.00-5.17 (3H, m), 5.32 (3/7H, dq, *J* = 15.1, 1.8 Hz), 5.37 (4/7H, dq, *J* = 15.1, 1.8 Hz), 5.59-5.68 (4/7H, m), 5.79-5.98 (10/7H, m); <sup>13</sup>C NMR (100 MHz, CDCl<sub>3</sub>) δ: 14.1, 22.6, 24.8, 25.0, 25.8, 25.87, 25.94, 26.4, 26.5, 27.6, 28.0, 28.4, 28.5, 31.80, 31.83, 35.2, 35.6, 40.8, 41.4, 65.2, 66.3, 77.8, 79.0, 103.2, 105.1, 115.7, 116.2, 116.4, 117.2, 135.0, 135.2, 139.3, 139.9 ; IR (KBr): 2928, 2855, 2251, 1645, 1466, 1452, 1379 cm<sup>-1</sup>; HRMS (FAB): Calcd for C<sub>18</sub>H<sub>32</sub>NaO<sub>2</sub> (M+Na<sup>+</sup>): 303.2300, found 303.2318.

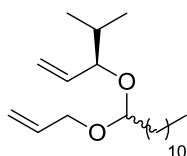

**2c** : According to the general procedure, **2c** (233.3 mg, 68%) was obtained as 5:6 of diastereomeric mixture from **1a** (297.0 mg, 1.05 mmol), TMSOTf (0.38 mL, 2.10 mmol), 2,4,6-collidine (0.42 mL, 3.15 mmol), and **6b**<sup>2</sup> (526.4 mg, 5.26 mmol). Eluent: hexane/benzene= 1/1; colorless oil; <sup>1</sup>H NMR (400 MHz, CDCl<sub>3</sub>) δ: 0.86-0.96 (9H, m), 1.27-1.37 (18H, m), 1.59-1.64 (2H, m), 1.72-1.83 (1H, m), 3.57-3.60 (5/11H, m), 3.72 (6/11H, dd, *J* = 8.2, 6.4 Hz), 3.91-4.11 (2H, m), 4.53 (5/11H, t, *J* = 5.3 Hz), 4.58 (6/11H, t, *J* = 5.7 Hz), 5.11-5.30 (4H, m), 5.57-5.66 (6/11H, m), 5.74-5.96 (16/11H, m); <sup>13</sup>C NMR (100 MHz, CDCl<sub>3</sub>) δ: 14.1, 17.9, 18.3, 18.6, 18.7, 22.7, 24.6, 24.7, 29.3, 29.47, 29.55, 29.57, 29.61, 29.64, 31.9, 32.4, 32.6, 33.8, 34.1, 64.5, 66.3, 82.6, 83.6, 99.8, 102.1, 116.2, 116.4, 116.8, 118.2, 135.0, 135.3, 137.2, 137.7; IR (KBr): 2924, 2855, 2247, 1645, 1468 cm<sup>-1</sup>; HRMS (EI): Calcd for C<sub>21</sub>H<sub>40</sub>O<sub>2</sub> (M<sup>+</sup>) 324.3028, found 324.3048.

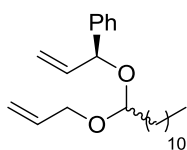

**2d** : According to the general procedure, **2d** (243.2 mg, 47%) was obtained as 7:8 of diastereomeric mixture from **1a** (408.6 mg, 1.45 mmol), TMSOTf (0.52 mL, 2.89 mmol), 2,4,6-collidine (0.57 mL, 4.34 mmol), and **6c** (0.57 mL, 4.34 mmol). Eluent: hexane/benzene= 1/1; colorless oil; <sup>1</sup>H NMR (400 MHz, CDCl<sub>3</sub>) δ: 0.88 (3H, t, *J* = 6.9 Hz), 1.22-1.38 (18H, m), 1.60-1.69 (2H, m), 3.89-3.94 (8/15H, m), 3.99-4.04 (22/15H, m), 4.52 (7/15H, t, *J* = 5.7 Hz), 4.75 (8/15H, t, *J* = 5.7 Hz), 5.07-5.33 (5H, m), 5.79-6.06 (2H, m), 7.24-7.38 (5H, m); <sup>13</sup>C NMR (100 MHz, CDCl<sub>3</sub>) δ: 14.1, 22.7, 24.6, 24.7, 29.3, 29.37, 29.43, 29.49, 29.53, 29.57, 29.61, 29.63, 31.9, 33.68, 33.72, 65.05, 65.10, 78.3, 78.5, 100.6, 100.7, 115.3, 116.5, 116.7, 126.7, 127.3, 127.4, 127.6, 128.3, 128.4, 134.9, 135.0, 138.6, 139.3, 140.9, 141.4; IR (KBr): 2924, 2853, 1643, 1454, 1115 cm<sup>-1</sup>; HRMS (EI): Calcd for C<sub>24</sub>H<sub>38</sub>O<sub>2</sub> (M<sup>+</sup>) 358.2872, found 358.2898.

### General Procedure A for Preparation of 2,4-disubstituted-1,3-dioxepin 4a-4d.

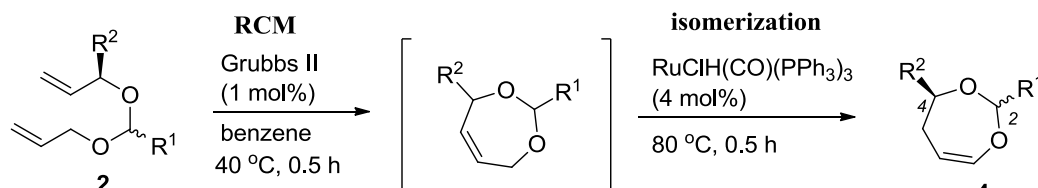

**2a** (R<sup>1</sup> = C<sub>11</sub>H<sub>23</sub>, R<sup>2</sup> = C<sub>5</sub>H<sub>11</sub>)  
**2b** (R<sup>1</sup> = Cy, R<sup>2</sup> = C<sub>5</sub>H<sub>11</sub>)  
**2c** (R<sup>1</sup> = C<sub>11</sub>H<sub>23</sub>, R<sup>2</sup> = *i*Pr)  
**2d** (R<sup>1</sup> = C<sub>11</sub>H<sub>23</sub>, R<sup>2</sup> = Ph)

**4a** (R<sup>1</sup> = C<sub>11</sub>H<sub>23</sub>, R<sup>2</sup> = C<sub>5</sub>H<sub>11</sub>)  
**4b** (R<sup>1</sup> = Cy, R<sup>2</sup> = C<sub>5</sub>H<sub>11</sub>)  
**4e** (R<sup>1</sup> = C<sub>11</sub>H<sub>23</sub>, R<sup>2</sup> = *i*Pr)  
**4f** (R<sup>1</sup> = C<sub>11</sub>H<sub>23</sub>, R<sup>2</sup> = Ph)

Grubbs' 2<sup>nd</sup> cat. (1 mol%) was added to a solution of mixed allyl acetal **2** in benzene (0.05 M) at room temperature under N<sub>2</sub>. The mixture was stirred at 40 °C. After checking disappearance of **2** and completion of RCM on TLC, RuClH(CO)(PPh<sub>3</sub>)<sub>3</sub> (4 mol%) was added to the resulting mixture, and the solution was stirred at 80 °C. After disappearance of RCM product on TLC, the mixture was evaporated in vacuo. The residue was purified by flash column chromatography using neutralized SiO<sub>2</sub> [purchased from KANTO CHEMICAL CO., INC.; Silica Gel 60 N (spherical, neutral)] to give a 2,4-disubstituted-1,3-dioxepin **4**. The relative stereochemistry of 2,4-disubstituted-1,3-dioxepin **4** between H-2 and H-4 was determined by NOE experiments.

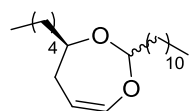

**4a**: According to the general procedure, **4a** (149.0 mg, 76%) was obtained as 1:1 (= *cis* : *trans*) of diastereomeric mixture from **2a** (212.9 mg, 0.604 mmol), Grubbs' 2<sup>nd</sup> cat. (5.2 mg, 0.0061 mmol), RuClH(CO)(PPh<sub>3</sub>)<sub>3</sub> (23.0 mg, 0.024 mmol). Eluent: hexane/benzene= 3/2.

*cis*-**4a**; colorless oil; <sup>1</sup>H NMR (400 MHz, CDCl<sub>3</sub>) δ: 0.86-0.91 (6H, m), 1.26-1.48 (25H, m), 1.57-1.64 (1H, m), 1.71-1.76 (2H, m), 2.10-2.29 (2H, m), 3.23-3.29 (1H, m), 4.49 (1H, t, *J* = 5.7 Hz), 4.72 (1H, td, *J* = 7.6, 2.6 Hz), 6.32 (1H, dd, *J* = 7.6, 2.6 Hz). <sup>13</sup>C NMR (100 MHz, CDCl<sub>3</sub>) δ: 14.05, 14.13, 22.6, 22.7, 24.7, 25.9, 29.4, 29.59, 29.64, 29.7, 31.7, 31.9, 35.7, 35.86, 35.91, 80.2, 106.1, 106.3, 145.8; IR (KBr): 2924, 2855, 1653, 1466, 1123 cm<sup>-1</sup>; HRMS (EI): Calcd for C<sub>21</sub>H<sub>40</sub>O<sub>2</sub> (M<sup>+</sup>) 324.3028, found 324.3053.

*trans*-**4a**; colorless oil; <sup>1</sup>H NMR (400 MHz, CDCl<sub>3</sub>) δ: 0.86-0.90 (6H, m), 1.19-1.46 (25H, m), 1.51-1.66 (3H, m), 2.02-2.10 (1H, m), 2.50-2.59 (1H, m), 4.24-4.31 (1H, m), 4.67 (1H, td, *J* = 7.2, 3.6 Hz), 5.43 (1H, t, *J* = 5.3 Hz), 6.24 (1H, dd, *J* = 7.2, 2.1 Hz). <sup>13</sup>C NMR (100 MHz, CDCl<sub>3</sub>) δ: 14.05, 14.13, 22.6, 22.7, 24.5, 25.2, 29.38, 29.40, 29.6, 29.65, 29.68, 30.8, 31.8, 31.9, 35.3, 36.1, 77.9, 99.9, 103.9, 146.5; IR (KBr): 2924, 2855, 1651, 1466, 1258 cm<sup>-1</sup>; HRMS (EI): Calcd for C<sub>21</sub>H<sub>40</sub>O<sub>2</sub> (M<sup>+</sup>) 324.3028, found 324.3033.

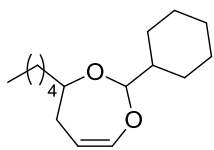

**4b**: According to the general procedure, **4b** (218.0 mg, 73%) was obtained as 1:1 (= *cis* : *trans*) of diastereomeric mixture from **2b** (334.7 mg, 1.19 mmol), Grubbs' 2<sup>nd</sup> cat. (10.1 mg, 0.0119 mmol), RuClH(CO)(PPh<sub>3</sub>)<sub>3</sub> (45.3 mg, 0.048 mmol). Eluent: hexane/CH<sub>2</sub>Cl<sub>2</sub>= 2/1; colorless oil; <sup>1</sup>H NMR (400 MHz, CDCl<sub>3</sub>) δ: 0.87-0.91 (3H, m), 0.99-1.90 (21H, m), 2.00-2.08 (1/2H, m), 2.13 (1/2H, ddd, *J* = 16.5, 7.8, 2.7 Hz), 2.20-2.28 (1/2H, m), 2.51-2.59 (1/2H, m), 3.20-3.26 (1/2H, m), 4.22 (1/2H, d, *J* = 6.0 Hz), 4.24-4.31 (1/2H, m), 4.62-4.72 (1H, m), 5.17 (1/2H, d, *J* = 5.5 Hz), 6.23 (1/2H, dd, *J* = 6.6, 2.1 Hz), 6.33 (1/2H, dd, *J* = 7.5, 3.0 Hz); <sup>13</sup>C NMR (100 MHz, CDCl<sub>3</sub>) δ: 14.0, 22.6, 25.2, 25.87, 25.90, 26.5, 27.60, 27.62, 27.7, 28.4, 30.7, 31.7, 31.8, 35.91, 35.95, 36.3, 42.6, 43.2, 78.2, 80.2, 102.4, 103.4, 105.9, 109.3, 145.9, 146.5; IR (KBr): 2926, 1651, 1452, 1263 cm<sup>-1</sup>; HRMS (FAB): Calcd for C<sub>16</sub>H<sub>28</sub>NaO<sub>2</sub> (M+Na<sup>+</sup>): 275.1987, found 275.1977.

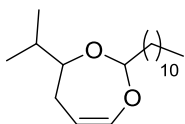

**4e**: According to the general procedure, **4e** (168.6 mg, 89%) was obtained as 5:6 (= *cis* : *trans*) of diastereomeric mixture from **2c** (206.4 mg, 0.64 mmol), Grubbs' 2<sup>nd</sup> cat. (5.3 mg, 0.0062 mmol), RuClH(CO)(PPh<sub>3</sub>)<sub>3</sub> (24.2 mg, 0.025 mmol). Eluent: hexane/CH<sub>2</sub>Cl<sub>2</sub>= 4/1; colorless oil; <sup>1</sup>H NMR (400 MHz, CDCl<sub>3</sub>) δ: 0.86-0.99 (9H, m), 1.26-1.43 (18H, m), 1.62-1.67 (1H, m), 1.71-1.80 (2H, m), 1.97 (6/11H, ddd, *J* = 17.3, 8.1, 2.6 Hz), 2.14-2.31 (10/11H, m), 2.57-2.65 (6/11H, m), 2.98-3.03 (5/11H, m), 4.07-4.12 (6/11H, m), 4.49 (5/11H, t, *J* = 5.5 Hz), 4.65-4.74 (1H, m), 5.47 (6/11H, t, *J* = 5.3 Hz), 6.24 (6/11H, dd, *J* = 6.4, 2.3 Hz), 6.31 (5/11H, dd, *J* = 7.3, 2.7 Hz). <sup>13</sup>C NMR (100 MHz, CDCl<sub>3</sub>) δ: 14.1, 17.9, 18.3, 18.8, 19.5, 22.7, 24.5, 24.6, 27.0, 29.3, 29.38, 29.39, 29.5, 29.61, 29.64, 31.9, 32.8, 33.1, 33.2, 35.2, 35.7, 83.0, 85.4, 100.2, 103.6, 105.9, 106.4, 145.4, 146.4; IR (KBr): 2955, 2924, 2855, 1653, 1466 cm<sup>-1</sup>; HRMS (FAB): Calcd for C<sub>19</sub>H<sub>37</sub>O<sub>2</sub> (M<sup>+</sup>+H): 297.2794, found 297.2783.

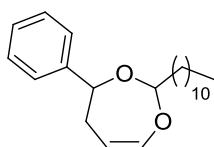

**4f**: According to the general procedure, **4f** (158.5 mg, 76%) was obtained as 1:1 (= *cis* : *trans*) of diastereomeric mixture from **2d** (225.7 mg, 0.63 mmol), Grubbs' 2<sup>nd</sup> cat. (5.4 mg, 0.0064 mmol), RuClH(CO)(PPh<sub>3</sub>)<sub>3</sub> (23.8 mg, 0.025 mmol). Eluent: hexane/CH<sub>2</sub>Cl<sub>2</sub>= 3/1 to hexane/AcOEt= 10/1; colorless oil; <sup>1</sup>H NMR (400 MHz, CDCl<sub>3</sub>) δ: 0.86-0.89 (3H, m), 1.24-1.47 (18H, m), 1.69-1.85 (2H, m), 2.27 (1/2H, ddd, *J* = 17.5, 7.7, 2.4 Hz), 2.41 (1/2H, ddd, *J* = 16.6, 7.9, 2.4 Hz), 2.55-2.63 (1/2H, m), 2.87-2.95 (1/2H, m), 4.38 (1/2H, dd, *J* = 11.0, 2.3 Hz), 4.69 (1/2H, t, *J* = 5.3 Hz), 4.78-4.87 (1H, m), 5.40 (1/2H, dd, *J* = 10.5, 2.7 Hz), 5.61 (1/2H, t, *J* = 5.5 Hz), 6.36 (1/2H, dd, *J* = 6.9, 1.8 Hz), 6.43 (1/2H, dd, *J* = 7.3, 2.7 Hz), 7.26-7.40 (5H, m); <sup>13</sup>C NMR (100 MHz, CDCl<sub>3</sub>) δ: 14.1, 22.7, 24.5, 24.6, 29.3, 29.4, 29.49, 29.55, 29.6, 31.9, 33.2, 35.2, 35.7, 37.7, 37.9, 79.8, 81.8, 101.3, 104.6, 106.3, 106.4, 125.8, 126.2, 127.4, 127.5, 128.2, 128.4, 142.3, 142.5, 146.4, 147.4; IR (KBr): 3034, 2924, 2853, 2251, 1651 cm<sup>-1</sup>; HRMS

(FAB): Calcd for  $C_{22}H_{35}O_2$  ( $M^+ + H$ ): 331.2637, found 331.2660.

### General Procedure B for Preparation of 2,4-disubstituted-1,3-dioxepin **4e** and **4f**.

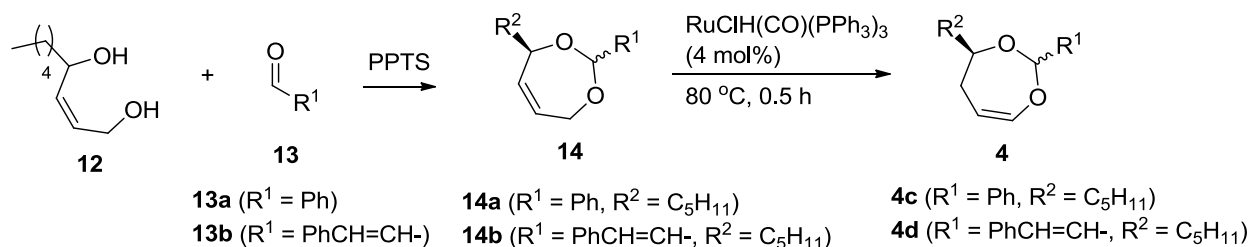

**14a**: PPTS (21.2 mg, 0.084 mmol) was added to a solution of **12**<sup>3</sup> (64.3 mg, 0.41 mmol) and benzaldehyde (**13a**) (0.21 mL, 2.03 mmol) in  $\text{CH}_2\text{Cl}_2$  (2.0 mL) at room temperature under  $\text{N}_2$ . The mixture was stirred at the same temperature for 12.5 h. The mixture was quenched with saturated aqueous  $\text{NaHCO}_3$  and extracted with  $\text{CH}_2\text{Cl}_2$ . The organic layer was dried over  $\text{Na}_2\text{SO}_4$ , filtered, and evaporated in vacuo. MeOH (10 mL) was added to the residue and cooled to  $0^\circ\text{C}$ , then  $\text{NaBH}_4$  (77.8 mg, 2.06 mmol) was added to a solution. The mixture was stirred at the same temperature for 15 min. The mixture was quenched with saturated aqueous  $\text{NH}_4\text{Cl}$  and extracted with  $\text{CH}_2\text{Cl}_2$ . The organic layer was dried over  $\text{Na}_2\text{SO}_4$ , filtered, and evaporated in vacuo. The residue was purified by flash  $\text{SiO}_2$  column chromatography (hexane/ $\text{AcOEt} = 10/1$ ) to give **14a** (76.5 mg, 76%) as 7:4 of diastereomeric mixture; colorless oil;  $^1\text{H}$  NMR (500 MHz,  $\text{CDCl}_3$ )  $\delta$ : 0.80 (12/11H, t,  $J = 7.3$  Hz), 0.92 (21/11H, t,  $J = 7.0$  Hz), 0.99-1.80 (8H, m), 4.03-4.07 (7/11H, m), 4.30-4.34 (1H, m), 4.43-4.55 (15/11H, m), 5.58-5.77 (2H, m), 5.87 (7/11H, s), 5.92 (4/11H, s), 7.32-7.39 (3H, m), 7.54-7.57 (2H, m);  $^{13}\text{C}$  NMR (125 MHz,  $\text{CDCl}_3$ )  $\delta$ : 13.9, 14.0, 22.5, 22.6, 25.0, 25.3, 31.4, 31.7, 35.3, 35.7, 62.2, 66.6, 69.7, 77.1, 100.7, 101.6, 126.4, 126.6, 127.9, 128.1, 128.2, 128.3, 129.2, 129.8, 134.2, 134.6, 139.0, 139.2; IR (KBr): 2932, 2859, 1450, 1346, 1207  $\text{cm}^{-1}$ ; HRMS (FAB): Calcd for  $\text{C}_{16}\text{H}_{23}\text{O}_2$  ( $M^+ + H$ ): 247.1698, found 247.1706.

**14b**: PPTS (103.9 mg, 0.41 mmol) was added to a solution of **12**<sup>3</sup> (327.8 mg, 2.07 mmol) and cinnamaldehyde (**13b**) (1.3 mL, 10.35 mmol) in  $\text{CH}_2\text{Cl}_2$  (5.2 mL) at room temperature under  $\text{N}_2$ . The mixture was stirred at the same temperature for 17 h. The mixture was quenched with saturated aqueous  $\text{NaHCO}_3$  and extracted with  $\text{CH}_2\text{Cl}_2$ . The organic layer was dried over  $\text{Na}_2\text{SO}_4$ , filtered, and evaporated in vacuo. MeOH (21 mL) was added to the residue and cooled to  $0^\circ\text{C}$ , then  $\text{NaBH}_4$  (391.9 mg, 10.36 mmol) was added to a solution. The mixture was stirred at the same temperature for 30 min. The mixture was quenched with saturated aqueous  $\text{NH}_4\text{Cl}$  and extracted with  $\text{Et}_2\text{O}$ . The organic layer was dried over  $\text{Na}_2\text{SO}_4$ ,

filtered, and evaporated in vacuo. The residue was purified by flash SiO<sub>2</sub> column chromatography (hexane/AcOEt = 15/1) to give **14b** (258.0 mg, 43%) as 6:7 of diastereomeric mixture; colorless oil; <sup>1</sup>H NMR (400 MHz, CDCl<sub>3</sub>) δ: 0.84 (18/13H, t, *J* = 6.9 Hz), 0.90 (21/13H, t, *J* = 6.9 Hz), 1.26-1.74 (8H, m), 4.05-4.11 (7/13H, m), 4.35-4.54 (32/13H, m), 5.45 (7/13H, dd, *J* = 4.0, 1.2 Hz), 5.50 (6/13H, dd, *J* = 4.0, 1.2 Hz), 5.59-5.75 (2H, m), 6.21-6.28 (1H, m), 6.80 (1H, t, *J* = 16.0 Hz), 7.23-7.43 (5H, m); <sup>13</sup>C NMR (100 MHz, CDCl<sub>3</sub>) δ: 14.0, 14.1, 22.58, 22.60, 25.27, 25.33, 31.6, 31.7, 35.4, 35.6, 62.2, 66.7, 70.0, 77.1, 100.3, 101.3, 126.0, 126.1, 126.7, 126.8, 127.95, 128.00, 128.5, 128.6, 129.3, 129.8, 132.6, 133.0, 134.1, 134.6, 136.2; IR (KBr): 2930, 2857, 1449, 1346, 1138 cm<sup>-1</sup>; HRMS (FAB): Calcd for C<sub>18</sub>H<sub>25</sub>O<sub>2</sub> (M<sup>+</sup>+H): 273.1855, found 273.1853.

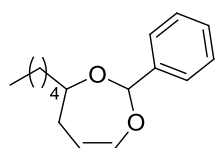

**4c**: According to the general procedure A, **4c** (55.9 mg, 77%) was obtained as 2:1 (= *cis* : *trans*) of diastereomeric mixture from **14a** (72.2 mg, 0.29 mmol) and RuClH(CO)(PPh<sub>3</sub>)<sub>3</sub> (11.0 mg, 0.024 mmol). Eluent: hexane/benzene= 2/1. The relative stereochemistry of **4c** was determined by NOE experiments; colorless oil; <sup>1</sup>H NMR (400 MHz, CDCl<sub>3</sub>) δ: 0.86-0.90 (3 H, m), 1.19-1.77 (8 H, m), 2.17-2.29 (1H, m), 2.35-2.43 (2/3 H, m), 2.62-2.71 (1/3H, m), 3.45-3.55 (2/3H, m), 4.43-4.50 (1/3H, m), 4.83 (1/3H, td, *J* = 7.1, 3.2 Hz), 4.89 (2/3H, td, *J* = 7.7, 2.6 Hz), 5.51 (2/3H, s), 6.40-6.42 (2/3 H, m), 6.49 (2/3H, dd, *J* = 7.4, 1.7 Hz), 7.30-7.40 (3H, m), 7.50-7.56 (2H, m); <sup>13</sup>C NMR (100 MHz, CDCl<sub>3</sub>) δ: 14.0, 22.6, 25.3, 26.0, 31.0, 31.7, 31.8, 35.8, 35.86, 35.89, 78.0, 80.7, 99.4, 104.6, 105.2, 107.1, 126.0, 126.2, 128.1, 128.2, 128.4, 128.6, 138.9, 139.2, 145.9, 146.7; IR (KBr): 2930, 1651, 1452, 1277, 1115 cm<sup>-1</sup>; HRMS (FAB): Calcd for C<sub>16</sub>H<sub>23</sub>O<sub>2</sub> (M<sup>+</sup>+H): 247.1698, found 247.1680.

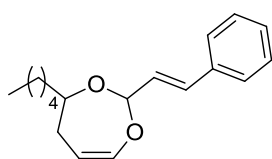

**4d**: According to the general procedure A, **4d** (24.9 mg, 59%) was obtained as 5:3 (= *cis* : *trans*) of diastereomeric mixture from **14b** (42.4 mg, 0.15 mmol) and RuClH(CO)(PPh<sub>3</sub>)<sub>3</sub> (5.6 mg, 0.0059 mmol). Eluent: hexane/benzene= 1/1. The relative stereochemistry of **4d** was determined by NOE experiments; colorless oil; <sup>1</sup>H NMR (400 MHz, ACETONE-D<sub>6</sub>) δ: 0.73-0.78 (3H, m), 1.16-1.54 (8H, m), 2.12-2.31 (13/8H, m), 2.61-2.69 (3/8H, m), 3.43-3.50 (5/8H, m), 4.28-4.35 (3/8H, m), 4.76-4.84 (1H, m), 5.17 (5/8H, dd, *J* = 4.4, 1.1 Hz), 6.07 (3/8H, dd, *J* = 5.0, 0.9 Hz), 6.24-6.31 (1H, m), 6.37 (1H, td, *J* = 7.7, 3.2 Hz), 6.79 (1H, dd like, *J* = 15.3, 14.0 Hz), 7.26-7.37 (3H, m), 7.47-7.50 (2H, m); <sup>13</sup>C NMR (100 MHz, ACETONE-D<sub>6</sub>) δ: 14.3, 23.2, 26.0, 26.5, 31.9, 32.4, 32.5, 36.5, 36.7, 78.4, 81.0, 99.5, 105.0, 105.6, 107.3, 127.5, 127.8, 128.8, 129.5, 132.5, 132.9, 137.18, 137.24, 146.3, 146.8; IR (KBr): 2930, 2859, 1651, 1265 cm<sup>-1</sup>; HRMS (FAB): Calcd for C<sub>18</sub>H<sub>25</sub>O<sub>2</sub> (M<sup>+</sup>+H): 273.1855, found 273.1826.

### General Procedure for Preparation of 2,3,5-trisubstituted-THF **5aA-5fA**.

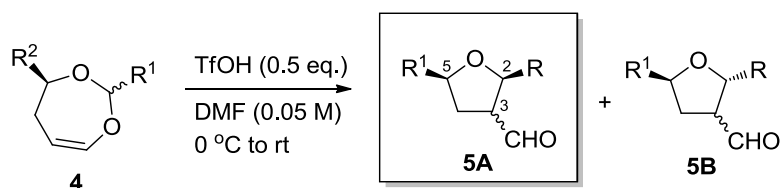

TfOH (0.5 equiv) was added dropwise to a solution of 1,3-dioxepin (1.0 equiv) in DMF (0.05 M) at 0 °C under N<sub>2</sub>. The mixture was stirred at room temperature. After checking disappearance of 1,3-dioxepin on TLC, the mixture was quenched with saturated aqueous NaHCO<sub>3</sub> at 0 °C. AcOEt and Et<sub>2</sub>O were added to the mixture, which was washed by water. The organic layer was dried over Na<sub>2</sub>SO<sub>4</sub>, filtered, and evaporated in vacuo. The residue was purified by flash SiO<sub>2</sub> column chromatography to give a 2,3,5-trisubstituted-THF.

The diastereomeric ratio was determined by integration value of  $\alpha$ -proton of aldehyde in <sup>1</sup>H NMR.

The relative stereochemistry between H2 and H5 was determined by NOE experiments.

The relative stereochemistry between H2 and H3 was determined by DBU-mediated isomerization.

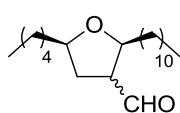

**5aA and 5aB:** According to the general procedure, **5aA** and **5aB** (52.2mg, 89%) were obtained as 95:5 of diastereomeric mixture from **4a** (58.7 mg, 0.181 mmol) and TfOH (8.0  $\mu$ L, 0.091 mmol). Eluent: hexane/CH<sub>2</sub>Cl<sub>2</sub> = 1/1; pale yellow oil; <sup>1</sup>H NMR (400 MHz, CDCl<sub>3</sub>)  $\delta$ : 0.86-0.91 (7H, m), 1.25-1.75 (29H, m), 2.16 (1H, ddd,  $J$  = 14.3, 7.7, 5.6 Hz), 2.87-2.94 (1H, m), 3.78-3.85 (1H, m), 3.91-3.96 (1H, m), 9.61 (2/100H, d,  $J$  = 3.2 Hz for minor isomer of **5aB**), 9.65 (88/100H, d,  $J$  = 4.1 Hz for major isomer of **5aA**), 9.67 (7/100H, d,  $J$  = 2.8 Hz for minor isomer of **5aA**), 9.74 (3/100H, d,  $J$  = 3.7 Hz for major isomer of **5aB**); <sup>13</sup>C NMR (100 MHz, CDCl<sub>3</sub>)  $\delta$ : 14.0, 14.1, 22.6, 22.7, 25.9, 26.7, 29.3, 29.4, 29.5, 29.6, 31.2, 31.86, 31.89, 32.3, 35.5, 53.9, 79.3, 81.4, 203.0; IR (KBr): 2926, 2855, 1722, 1466, 1261 cm<sup>-1</sup>; HRMS (FAB): Calcd for C<sub>21</sub>H<sub>40</sub>NaO<sub>2</sub> (M+Na<sup>+</sup>): 347.2926, found 347.2915.

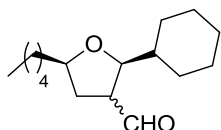

**5bA and 5bB:** According to the general procedure, **5bA** and **5bB** (15.5mg, 88%) were obtained as 90:10 of diastereomeric mixture from **4b** (17.7 mg, 0.070 mmol) and TfOH (3.1  $\mu$ L, 0.035 mmol). Eluent: hexane/AcOEt = 4/1; pale yellow oil; <sup>1</sup>H NMR (400 MHz, C<sub>6</sub>D<sub>6</sub>)  $\delta$ : 0.78-1.72 (23H, m), 2.21-2.26 (1H, m), 2.49-2.55 (1H, m), 3.23 (1H, dd,  $J$  = 9.6, 6.0 Hz), 3.48-3.55 (1H, m), 9.27 (3/100H, d,  $J$  = 3.9 Hz for minor isomer of **5bB**), 9.30 (10/100H, d,  $J$  = 2.8 Hz for minor isomer of **5bA**), 9.57 (80/100H, d,  $J$  = 4.6 Hz for major isomer of **5bA**), 9.60 (7/100H, d,  $J$  = 4.1 Hz for major



isomer of **5bB**);  $^{13}\text{C}$  NMR (100 MHz,  $\text{C}_6\text{D}_6$ )  $\delta$ : 14.2, 23.0, 25.78, 25.84, 26.4, 26.7, 29.2, 31.4, 32.2, 32.4, 36.0, 38.8, 52.8, 78.7, 86.6, 201.2; IR (KBr): 2924, 2853, 1721, 1466, 1458, 1449  $\text{cm}^{-1}$ ; HRMS (FAB): Calcd for  $\text{C}_{16}\text{H}_{29}\text{O}_2$  ( $\text{M}^+\text{H}$ ): 253.2168, found 253.2164.

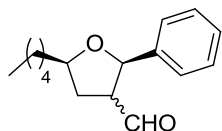

**5cA and 5cB:** According to the general procedure, **5cA** and **5cB** (26.7 mg, 95%) were obtained as 96:4 of diastereomeric mixture from **4c** (28.0 mg, 0.114 mmol) and TfOH (5.0  $\mu\text{L}$ , 0.057 mmol). Eluent: hexane/AcOEt= 8/1; pale yellow oil;  $^1\text{H}$  NMR (400 MHz,  $\text{CDCl}_3$ )  $\delta$ : 0.90-0.93 (3H, m), 1.33-1.56 (6H, m), 1.65-1.73 (1H, m), 1.80-1.90 (1H, m), 2.00 (1H, ddd,  $J = 14.2, 7.8, 5.3$  Hz), 2.22 (1H, ddd,  $J = 14.2, 7.8, 5.3$  Hz), 3.23-3.29 (1H, m), 3.99-4.06 (1H, m), 5.17 (1H, d,  $J = 8.2$  Hz), 7.24-7.36 (5H, m), 9.07 (90/100H, d,  $J = 3.2$  Hz for major isomer of **5cA**), 9.17 (3/100H, d,  $J = 2.8$  Hz for major isomer of **5cB**), 9.78 (1/100H, d,  $J = 2.3$  Hz for minor isomer of **5cB**), 9.81 (6/100H, d,  $J = 2.3$  Hz for minor isomer of **5cA**);  $^{13}\text{C}$  NMR (100 MHz,  $\text{CDCl}_3$ )  $\delta$ : 14.0, 22.6, 25.9, 31.9, 32.1, 35.1, 55.5, 79.7, 81.5, 126.1, 127.9, 128.6, 137.5, 201.7; IR (KBr): 2955, 2930, 2859, 1724, 1454  $\text{cm}^{-1}$ ; HRMS (FAB): Calcd for  $\text{C}_{16}\text{H}_{23}\text{O}_2$  ( $\text{M}^+\text{H}$ ): 247.1698, found 247.1708.

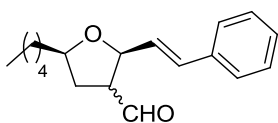

**5dA and 5dB:** According to the general procedure, **5dA** and **5dB** (21.1mg, 94%) were obtained as 89:11 of diastereomeric mixture from **4d** (22.4 mg, 0.078 mmol) and TfOH (3.4  $\mu\text{L}$ , 0.039 mmol). Eluent: hexane/AcOEt= 8/1; pale yellow oil;  $^1\text{H}$  NMR (400 MHz,  $\text{CD}_3\text{CN}$ )  $\delta$ : 0.89-0.93 (3H, m), 1.31-1.92 (9H, m), 2.13-2.20 (1H, m), 3.18-3.25 (1H, m), 3.88-3.95 (1H, m), 4.69-4.73 (1H, m), 6.30 (1H, dd,  $J = 15.6, 6.8$  Hz), 6.71 (1H, dd,  $J = 15.6, 0.9$  Hz), 7.24-7.44 (5H, m), 9.61 (78/100H, d,  $J = 3.2$  Hz for major isomer of **5dA**), 9.66 (4/100H, d,  $J = 2.3$  Hz for minor isomer of **5dB**), 9.69 (7/100H, d,  $J = 2.8$  Hz for major isomer of **5bB**), 9.69 (11/100H, d,  $J = 2.3$  Hz for minor isomer of **5dA**);  $^{13}\text{C}$  NMR (100 MHz,  $\text{CDCl}_3$ )  $\delta$ : 14.0, 22.6, 25.9, 31.8, 32.1, 35.4, 55.5, 79.8, 80.6, 125.1, 126.6, 128.0, 128.5, 132.8, 136.1, 201.7; IR (KBr): 2957, 2932, 2861, 1722, 970  $\text{cm}^{-1}$ ; HRMS (FAB): Calcd for  $\text{C}_{18}\text{H}_{25}\text{O}_2$  ( $\text{M}^+\text{H}$ ): 273.1855, found 273.1804.

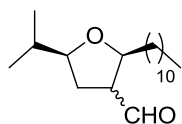

**5eA and 5eB:** According to the general procedure, **5eA** and **5eB** (19.0mg, 85%) were obtained as 92:8 of diastereomeric mixture from **4e** (22.4 mg, 0.076 mmol) and TfOH (3.4  $\mu\text{L}$ , 0.038 mmol). Eluent: hexane/AcOEt= 30/1 to 20/1; pale yellow oil;  $^1\text{H}$  NMR (400 MHz,  $\text{CDCl}_3$ )  $\delta$ : 0.86-0.90 (3H, m), 0.92 (3H, d,  $J = 6.4$  Hz), 1.01 (3H, d,  $J = 6.4$  Hz), 1.25-1.37 (21H, m), 1.73-1.82 (1H, m), 1.83-1.90 (1H, m), 2.04-2.11 (1H, m), 2.89-2.95 (1H, m), 3.48-3.54 (1H, m), 3.93-3.98 (1H, m), 9.60 (5/100H, d,  $J = 3.2$  Hz for the major isomer of **5eB**), 9.64 (82/100H, d,  $J = 4.1$  Hz for major isomer of **5eA**), 9.67 (8/100H, d,  $J = 2.7$  Hz for the minor isomer of **5eA**), 9.75 (5/100H, d,  $J = 3.9$  Hz for minor isomer of **5eB**);  $^{13}\text{C}$  NMR (100 MHz,

CDCl<sub>3</sub>)  $\delta$ : 14.1, 18.4, 19.6, 22.7, 26.6, 29.3, 29.4, 29.52, 29.54, 29.6, 29.9, 31.3, 31.9, 33.1, 53.8, 81.1, 84.6, 202.9; IR (KBr): 2957, 2926, 2853, 1724, 1468 cm<sup>-1</sup>; HRMS (FAB): Calcd for C<sub>19</sub>H<sub>37</sub>O<sub>2</sub> (M<sup>+</sup>+H): 297.2794, found 297.2783.

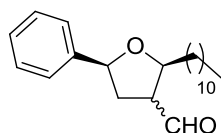

**5fA and 5fB:** According to the general procedure, **5fA** and **5fB** (19.2 mg, 82%) were obtained as 98:2 of diastereomeric mixture from **4e** (23.3 mg, 0.070 mmol) and TfOH (3.1  $\mu$ L, 0.035 mmol). Eluent: hexane/AcOEt= 15/1 to 10/1; pale yellow oil; <sup>1</sup>H NMR (400 MHz, CDCl<sub>3</sub>)  $\delta$ : 0.88 (3H, t,  $J$  = 6.9 Hz), 1.26-1.46 (17H, m), 1.52-1.62 (1H, m), 1.65-1.83 (1H, m), 2.18 (1H, ddd,  $J$  = 14.4, 7.1, 5.2 Hz), 2.49 (1H, ddd,  $J$  = 14.4, 7.1, 5.2 Hz), 3.06-3.12 (1H, m), 4.14-4.20 (1H, m), 4.87 (1H, dd,  $J$  = 8.9, 7.1 Hz), 7.26-7.40 (5H, m), 9.73 (88/100H, d,  $J$  = 4.1 Hz for major isomer of **5fA**), 9.76 (10/100H, d,  $J$  = 2.3 Hz for minor isomer of **5fA**) 9.85 (2/100H, d,  $J$  = 3.2 Hz for **5fB**); <sup>13</sup>C NMR (100 MHz, CDCl<sub>3</sub>)  $\delta$ : 14.1, 22.7, 26.8, 29.3, 29.46, 29.55, 29.58, 29.62, 29.64, 31.4, 31.9, 35.1, 54.3, 80.6, 81.8, 126.0, 127.7, 128.5, 141.3, 202.3; IR (KBr): 2924, 2853, 1724, 1493, 1456 cm<sup>-1</sup>; HRMS (FAB): Calcd for C<sub>22</sub>H<sub>35</sub>O<sub>2</sub> (M<sup>+</sup>+H): 331.2637, found 331.2660.

## Experiments in Scheme 5

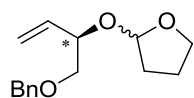

**7:** PPTS (108.7 mg, 0.433 mmol) was added to a solution of (*R*)-1-(benzyloxy)but-3-en-2-ol<sup>4</sup> (773.7 mg, 4.34 mmol) and 2,3-dihydrofuran (0.59 mL, 7.81 mmol) in CH<sub>2</sub>Cl<sub>2</sub> (11 mL) at room temperature under N<sub>2</sub>. The mixture was stirred at the same temperature for 10 min. The mixture was quenched with saturated aqueous NaHCO<sub>3</sub> and extracted with CH<sub>2</sub>Cl<sub>2</sub>. The organic layer was dried over Na<sub>2</sub>SO<sub>4</sub>, filtered, and evaporated in vacuo. The residue was purified by flash SiO<sub>2</sub> column chromatography (hexane/AcOEt = 4/1) to give **7** (1.05 g, 97%) as 1:1 of diastereomeric mixture; colorless oil; <sup>1</sup>H NMR (400 MHz, C<sub>6</sub>D<sub>6</sub>)  $\delta$ : 1.35-1.45 (1H, m), 1.53-1.65 (1H, m), 1.71-1.93 (2H, m), 3.36-3.49 (3/2H, m), 3.58-3.71 (3/2H, m), 3.80-3.91 (1H, m), 4.33 (1H, s), 4.40 (1H, s), 4.50-4.57 (1H, m), 5.07-5.13 (1H, m), 5.26-5.31 (1H, m), 5.38 (1/2H, dt,  $J$  = 17.4, 1.8 Hz), 5.53 (1/2H, d,  $J$  = 4.1 Hz), 5.74-5.94 (1H, m), 7.07-7.19 (3H, m), 7.26-7.32 (2H, m). <sup>13</sup>C NMR (100 MHz, CDCl<sub>3</sub>)  $\delta$ : 23.21, 23.24, 32.0, 32.4, 66.5, 66.8, 72.7, 72.8, 73.0, 75.2, 75.9, 100.7, 103.5, 115.6, 117.9, 127.27, 127.33, 128.1, 128.2, 135.4, 136.6, 138.1, 138.3; IR (KBr): 2930, 2359, 2340, 1454, 1186 cm<sup>-1</sup>; HRMS (FAB): Calcd for C<sub>15</sub>H<sub>21</sub>O<sub>3</sub> (M<sup>+</sup>+H): 249.1491, found 249.1479.

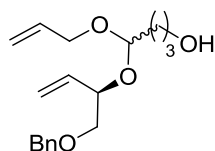

**8:** According to the literature<sup>5</sup>, TESOTf (0.63 mL, 2.800 mmol) and 2,4,6-collidine (0.55 mL, 4.200 mmol) were added to a solution of **7** (347.7 mg, 1.400 mmol) in CH<sub>2</sub>Cl<sub>2</sub> (14 mL) at 0 °C under N<sub>2</sub>. After 0.5 h stirring

at the same temperature, allyl alcohol (0.48 ml, 7.00 mmol) was added to the mixture which was then stirred at the same temperature for 2 h. The mixture was quenched with saturated aqueous NaHCO<sub>3</sub> and extracted with CH<sub>2</sub>Cl<sub>2</sub>. The organic layer was dried over Na<sub>2</sub>SO<sub>4</sub>, filtered, and evaporated in vacuo. MeOH (30 mL) was added to the residue then K<sub>2</sub>CO<sub>3</sub> (971.0 mg, 7.02 mmol) was added to a solution. The mixture was stirred at the same temperature for 1 h. K<sub>2</sub>CO<sub>3</sub> (963.0 mg, 6.97 mmol) was added to a solution again and stirred for another 1 h. The mixture was quenched with saturated aqueous NH<sub>4</sub>Cl and extracted with AcOEt. The organic layer was dried over Na<sub>2</sub>SO<sub>4</sub>, filtered, and evaporated in vacuo. The residue was purified by flash SiO<sub>2</sub> column chromatography (hexane/AcOEt = 2/1) to give **8** (368.6 mg, 86% over 2 steps) as 1:1 of diastereomeric mixture; colorless oil; <sup>1</sup>H NMR (400 MHz, CDCl<sub>3</sub>) δ: 1.61-1.87 (5H, m), 3.45-3.67 (4H, m), 3.94-4.16 (2H, m), 4.22-4.34 (1H, m), 4.55-4.57 (2H, m), 4.67 (1/2H, t, *J* = 5.3 Hz), 4.76 (1/2H, t, *J* = 5.0 Hz), 5.12-5.35 (4H, m), 5.71-5.96 (2H, m), 7.26-7.37 (5H, m); <sup>13</sup>C NMR (100 MHz, CDCl<sub>3</sub>) δ: 27.4, 27.5, 30.3, 30.7, 62.29, 62.32, 65.1, 66.5, 72.7, 73.1, 73.2, 73.3, 76.3, 76.7, 100.3, 102.5, 116.5, 116.6, 116.8, 117.0, 118.5, 127.4, 127.5, 127.6, 128.18, 128.24, 134.4, 134.6, 135.5, 136.1, 137.9, 138.0; IR (KBr): 3406, 3383, 2864, 1454, 1117 cm<sup>-1</sup>; HRMS (FAB): Calcd for C<sub>18</sub>H<sub>27</sub>O<sub>4</sub> (M<sup>+</sup>+H): 307.1909, found 307.1907.

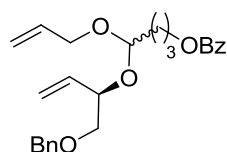

**9**: *i*Pr<sub>2</sub>NEt (0.3 mL, 1.775 mmol), benzoyl chloride (0.1 mL, 0.887 mmol) and DMAP (11.2 mg, 0.092 mmol) were successively added to a solution of **8** (151.2 mg, 0.493 mmol) in CH<sub>2</sub>Cl<sub>2</sub> (1.6 mL) at room temperature under N<sub>2</sub>. The mixture was stirred at the same temperature for 3.5 h. The mixture was evaporated in vacuo. The residue was purified by flash SiO<sub>2</sub> column chromatography (hexane/benzene = 1/10 to hexane/AcOEt = 5/1) to give **9** (201.3 mg, quant.) as 1:1 of diastereomeric mixture; colorless oil; <sup>1</sup>H NMR (400 MHz, CDCl<sub>3</sub>) δ: 1.77-1.87 (4H, m), 3.45-3.61 (2H, m), 3.95-4.16 (2H, m), 4.24-4.36 (3H, m), 4.54 (1H, d, *J* = 1.8 Hz), 4.57 (1H, d, *J* = 1.8 Hz), 4.70 (1/2H, t, *J* = 5.3 Hz), 4.78 (1/2H, t, *J* = 5.3 Hz), 5.12-5.35 (4H, m), 5.71-5.96 (2H, m), 7.26-7.58 (8H, m), 8.03 (2H, d, *J* = 8.2 Hz); <sup>13</sup>C NMR (100 MHz, CDCl<sub>3</sub>) δ: 23.9, 30.3, 30.7, 64.5, 64.6, 64.9, 66.3, 72.7, 73.1, 73.2, 73.4, 76.4, 76.5, 99.9, 102.2, 116.4, 116.5, 116.8, 118.4, 127.37, 127.42, 127.44, 128.1, 128.2, 129.4, 130.18, 130.22, 132.66, 132.68, 134.5, 134.7, 135.6, 136.1, 137.9, 138.1, 166.3; IR (KBr): 2860, 1717, 1452, 1275, 1113 cm<sup>-1</sup>; HRMS (FAB): Calcd for C<sub>25</sub>H<sub>30</sub>O<sub>5</sub>Na (M<sup>+</sup>+Na): 433.1991, found 433.1993.

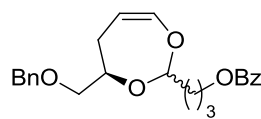

**10**: According to the general procedure A, **10** (21.7 mg, 57%) was obtained as 1:1 (= *cis* : *trans*) of diastereomeric mixture from **9** (41.1 mg, 0.100 mmol), Grubbs' 2<sup>nd</sup> cat. (3.5 mg, 0.0041 mmol), RuClH(CO)(PPh<sub>3</sub>)<sub>3</sub> (4.6 mg, 0.0097 mmol). Eluent: hexane/AcOEt = 10/1 to 8/1; pale yellow oil; <sup>1</sup>H NMR (400 MHz, CDCl<sub>3</sub>) δ: 1.80-1.97 (4H, m), 2.15 (1/2H, ddd, *J* = 17.4, 8.0, 3.0 Hz), 2.21-2.31 (1H, m), 2.70-2.78 (1/2H, m), 3.44-3.63 (5/2H, m), 4.32-4.36 (2H, m), 4.48-4.63

(3H, m), 4.71 (1/2H, td,  $J = 7.4, 2.1$  Hz), 4.79 (1/2H, td,  $J = 7.2, 3.4$  Hz), 5.61 (1/2H, t,  $J = 5.0$  Hz), 6.24 (1/2H, dd,  $J = 6.9, 2.3$  Hz), 6.34 (1/2H, dd,  $J = 7.1, 2.5$  Hz), 7.26-7.35 (5H, m), 7.41-7.45 (2H, m), 7.52-7.57 (1H, m), 8.03-8.05 (2H, m);  $^{13}\text{C}$  NMR (125 MHz,  $\text{CDCl}_3$ )  $\delta$ : 23.7, 23.9, 27.5, 31.7, 32.1, 32.2, 64.65, 64.67, 72.67, 72.75, 73.3, 73.4, 77.1, 79.1, 99.9, 103.6, 105.4, 105.9, 127.57, 127.60, 127.61, 128.28, 128.34, 129.5, 130.4, 132.8, 138.1, 145.7, 145.8, 146.3, 146.4, 166.5; IR (KBr): 2928, 1717, 1651, 1275, 1115  $\text{cm}^{-1}$ ; HRMS (FAB): Calcd for  $\text{C}_{23}\text{H}_{27}\text{O}_5$  ( $\text{M}^+ + \text{H}$ ): 383.1858, found 383.1832.

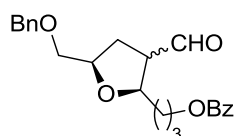

**11**: According to the general procedure for Preparation of 2,3,5-trisubstituted-THF, **11** (16.0 mg, 55%) was obtained as 30 : 1 of diastereomeric mixture from **10** (29.2 mg, 0.076 mmol) and TfOH (3.4  $\mu\text{l}$ , 0.038 mmol). Eluent: hexane/AcOEt= 2/1; pale yellow oil;  $^1\text{H}$  NMR (400 MHz,  $\text{CDCl}_3$ )  $\delta$ : 1.78-2.19 (6H, m), 2.93-2.99 (1H, m), 3.51-3.64 (2H, m), 4.06-4.18 (2H, m), 4.28-4.40 (2H, m), 4.56-4.63 (2H, m), 7.26-7.35 (5H, m), 7.44 (2H, t like,  $J = 7.3$  Hz), 7.56 (1H, t like,  $J = 7.3$  Hz), 8.01-8.03 (2H, m), 9.70 (97/100H, d,  $J = 3.7$  Hz for *cis*-isomer of **11**) 9.77 (3/100H, d,  $J = 3.6$  Hz for *trans*-isomer of **11**);  $^{13}\text{C}$  NMR (100 MHz,  $\text{CDCl}_3$ )  $\delta$ : 26.0, 27.8, 28.8, 53.4, 64.4, 71.9, 73.4, 78.0, 81.2, 127.66, 127.71, 128.3, 128.4, 129.5, 130.2, 132.9, 138.0, 166.5, 202.5; IR (KBr): 2860, 1719, 1275, 1113  $\text{cm}^{-1}$ ; HRMS (FAB): Calcd for  $\text{C}_{23}\text{H}_{27}\text{O}_5$  ( $\text{M}^+ + \text{H}$ ): 383.1858, found 383.1842.

## References

- 1) H. O. House, J. Lubinkowski, J. J. Good, *J. Org. Chem.*, 1975, **40**, 86.
- 2) D. M. Hodgson, M. J. Fleming, S. J. Stanway, *J. Org. Chem.*, 2007, **72**, 4763.
- 3) R. W. Bates, D. Diezmartin, W. J. Kerr, J. G. Knight, S. V. Ley, A. Sakellaridis, *Tetrahedron*, 1990, **46**, 4063.
- 4) A. K. Ghosh, S. Leshchenko, M. Noetzel, *J. Org. Chem.*, 2004, **69**, 7822.
- 5) H. Fujioka, T. Okitsu, T. Ohnaka, Y. Sawama, O. Kubo, K. Okamoto, Y. Kita, *Adv. Synth. Cat.*, 2007, **349**, 636.





<sup>1</sup>H NMR of *cis-2a*

D:\NMR\1-1-1-1-1\111111\kubo\kubo D 3 疊 3 疊 2 疊.d  
 single\_pulse  
 20-02-2010 02:56:28  
 1H  
 single\_pulse.ex2  
 399.78 MHz  
 4.19 KHz  
 7.29 Hz  
 13107  
 6002.31 Hz  
 16  
 2.1837 sec  
 5.0000 sec  
 5.35 usec  
 1H  
 19.2 c  
 CDCl<sub>3</sub>  
 0.00 ppm  
 0.12 Hz  
 40

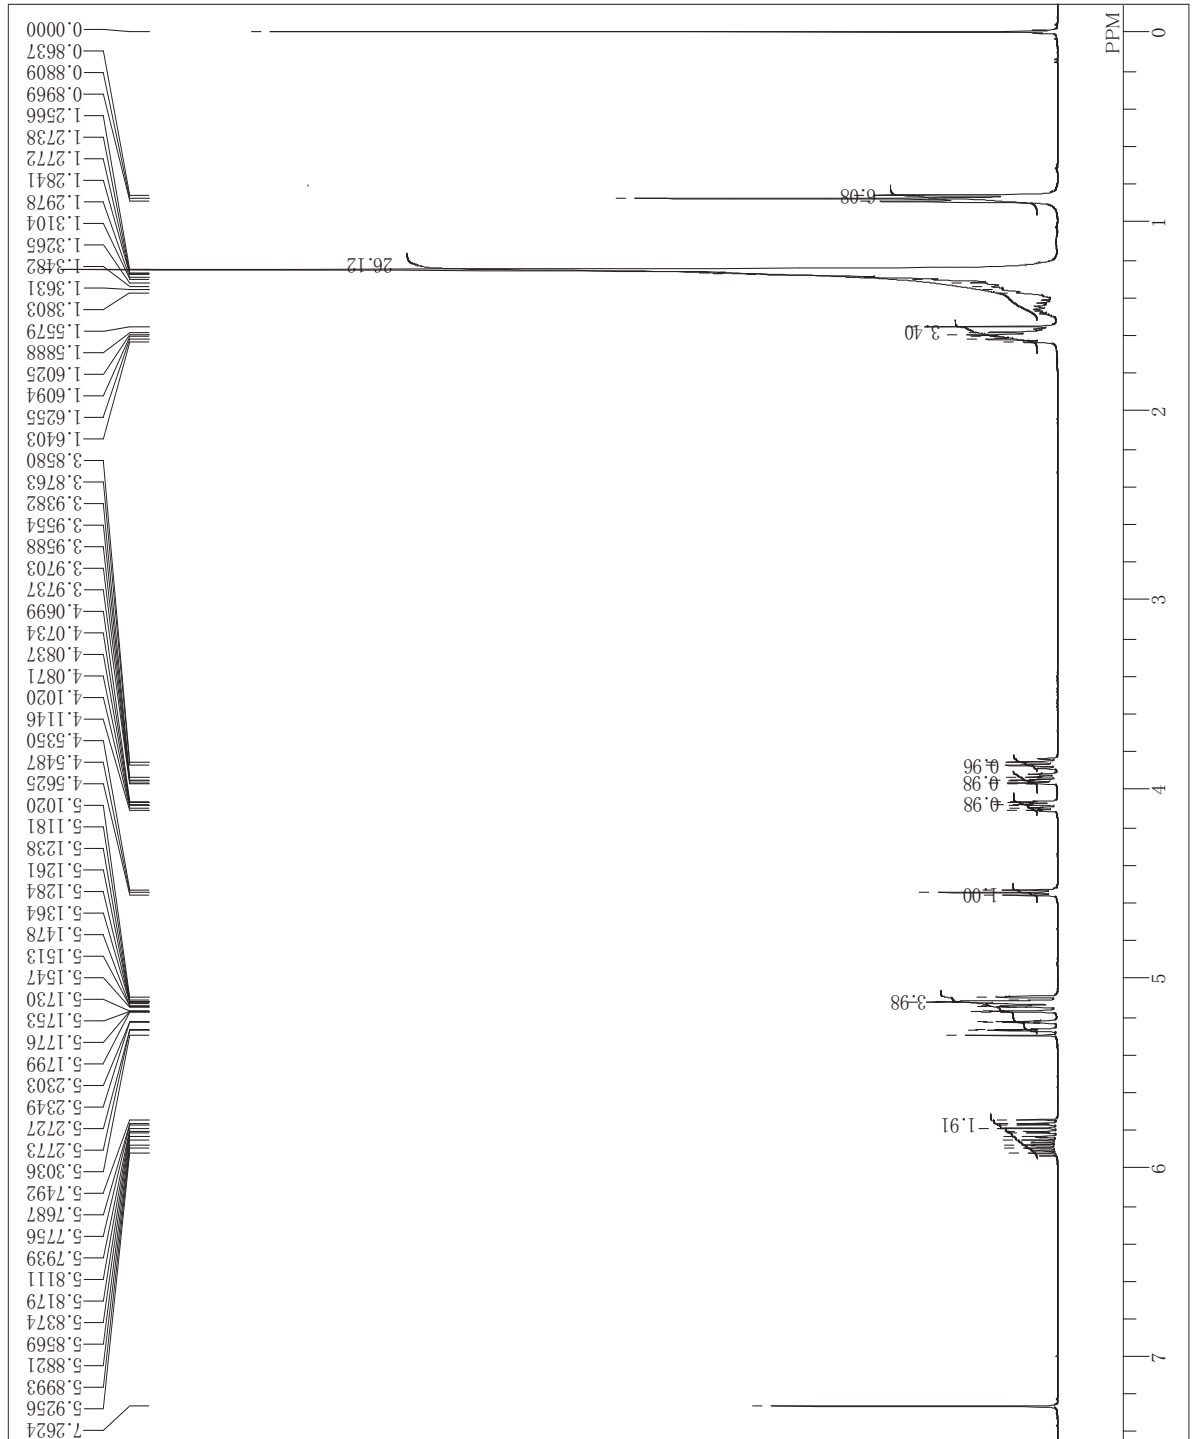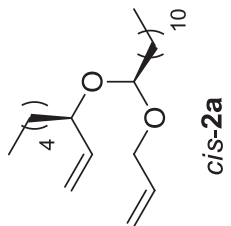

### $^{13}\text{C}$ NMR of *cis-2a*

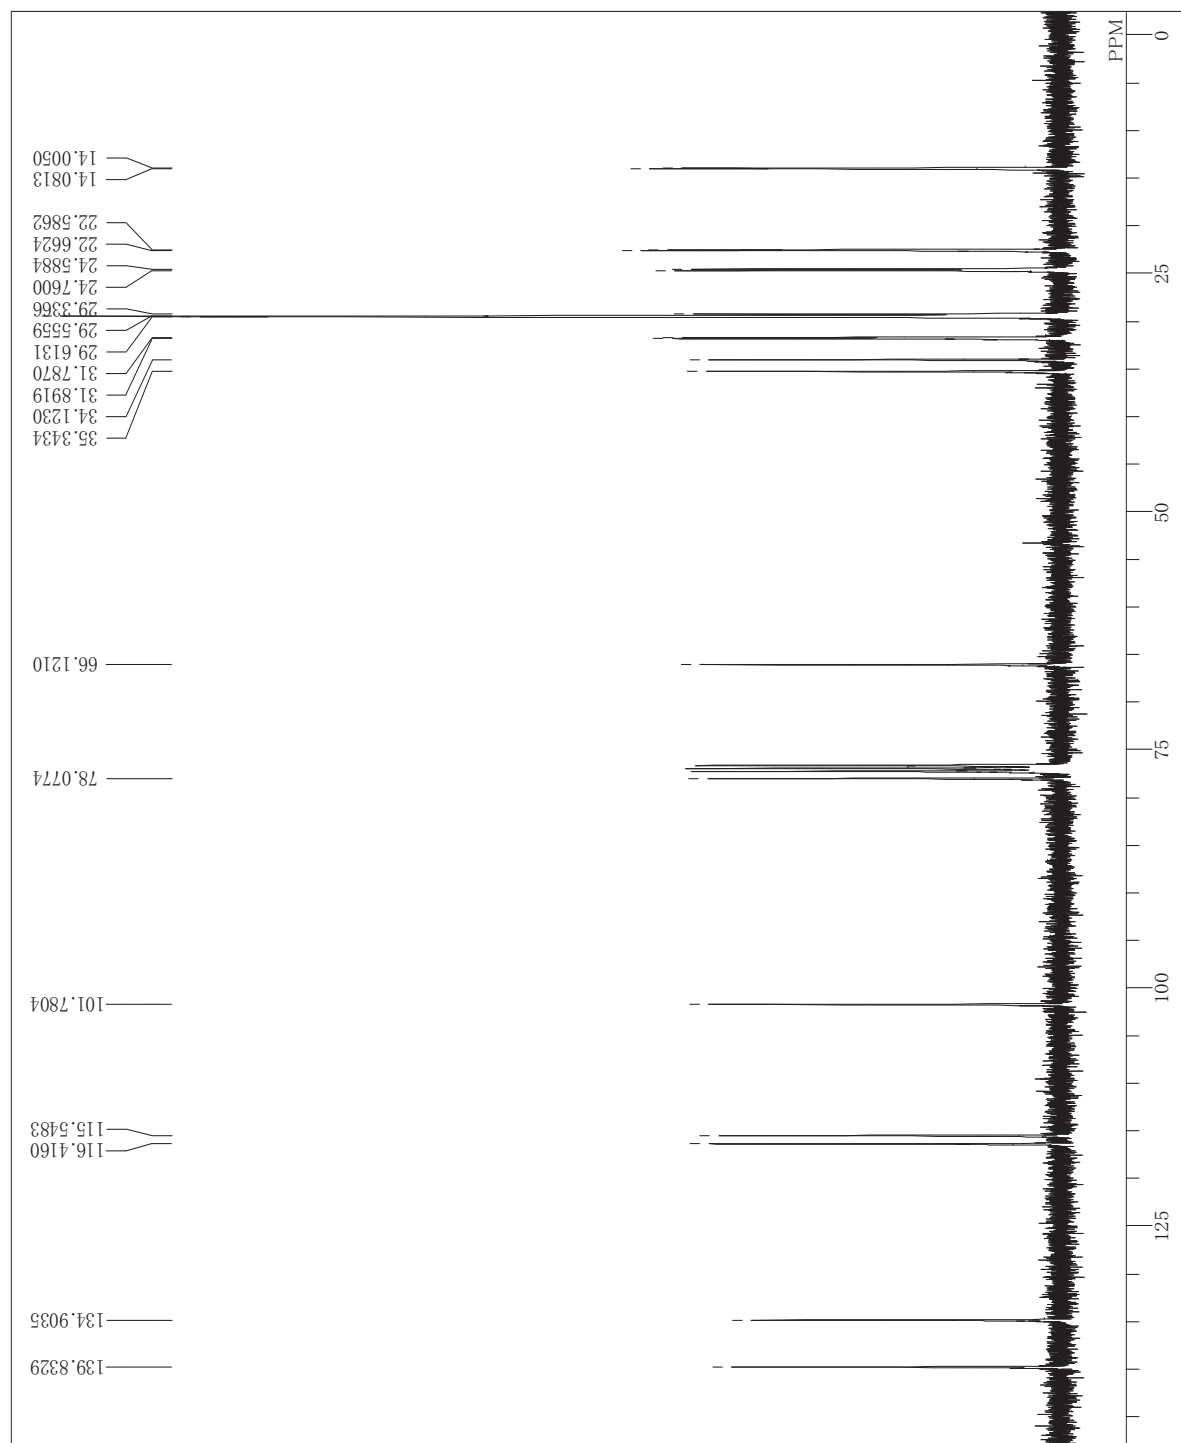

D: \\NMR\1-1-2010\201003\33\58  
single pulse decoupled gated NOE  
20-02-2010 03:33:58  
 $^{13}\text{C}$   
single-pulse\_dec  
100.53 MHz  
5.35 KHz  
5.86 Hz  
26214  
25125.24 Hz  
324  
1.0433 sec  
2.0000 sec  
3.17 usec  
IH 19.5 c  
CDCL<sub>3</sub>  
77.00 ppm  
0.12 Hz  
60  
RGAIN

DFILE  
COMNT  
DATIM  
OBNUC  
EXMOD  
OBFREQ  
OBSET  
OBFIN  
POINT  
FREQU  
SCANS  
ACQTM  
PD  
PWL  
IRNUC  
CTEMP  
SLVNT  
EXREF  
BF  
RGAIN

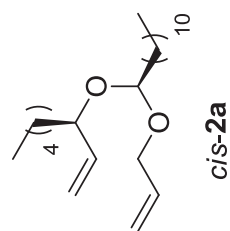



# <sup>1</sup>H NMR of *trans*-2a

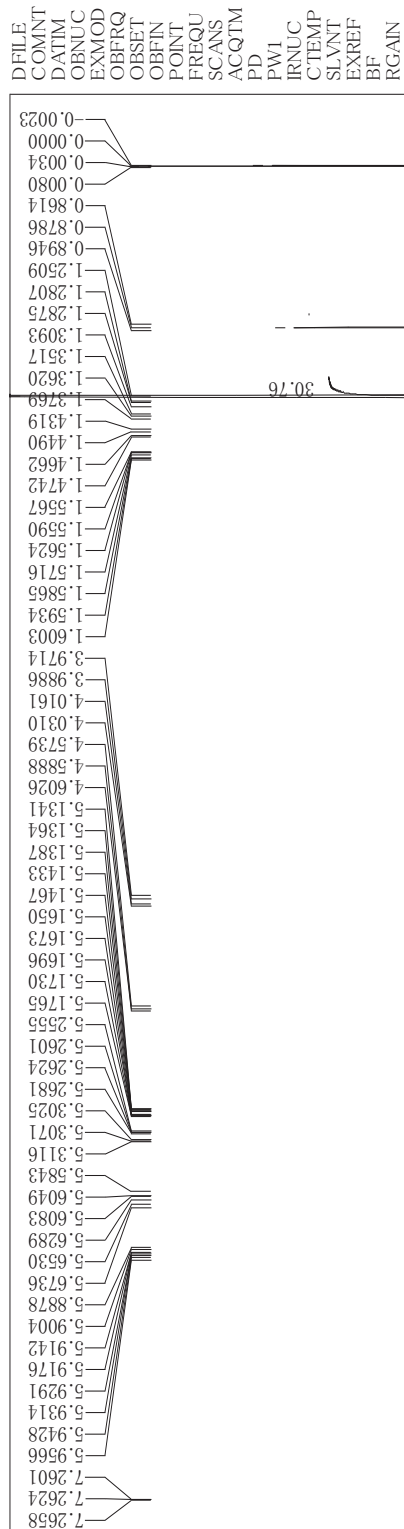

D:\NMR\1-1-1- 2010\kubo\kubo D 3谱 2谱.d  
single\_pulse  
23-02-2010 16:10:12  
1H  
single\_pulse.ex2  
399.78 MHz  
4.19 KHz  
7.29 Hz  
13107  
6002.31 Hz  
16  
2.1837 sec  
5.0000 sec  
5.35 usec  
1H 19.0 c  
CDCl3  
0.00 ppm  
0.12 Hz  
42

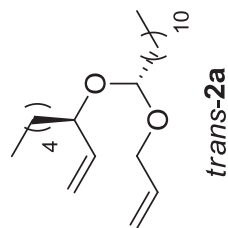



<sup>1</sup>H NMR of 2b

D1FILE  
 COMINT  
 DATIM  
 OBNUC  
 EXMOD  
 OBFREQ  
 OBSET  
 OBFIN  
 POINT  
 FREQU  
 SCANS  
 ACQTM  
 PD  
 PW1  
 IRNUC  
 CTEMP  
 SLVNT  
 EXREF  
 BF  
 RGAIN

C:\Documents and Settings\User\My Documents  
 single\_pulse  
 18-03-2011 21:09:39  
 1H  
 single\_pulse.ex2  
 399.78 MHz  
 4.19 KHz  
 7.29 Hz  
 13107  
 6002.31 Hz  
 8  
 2.1837 sec  
 5.0000 sec  
 5.35 usec  
 1H 25.0 c  
 C6D6  
 7.16 ppm  
 0.12 Hz  
 36

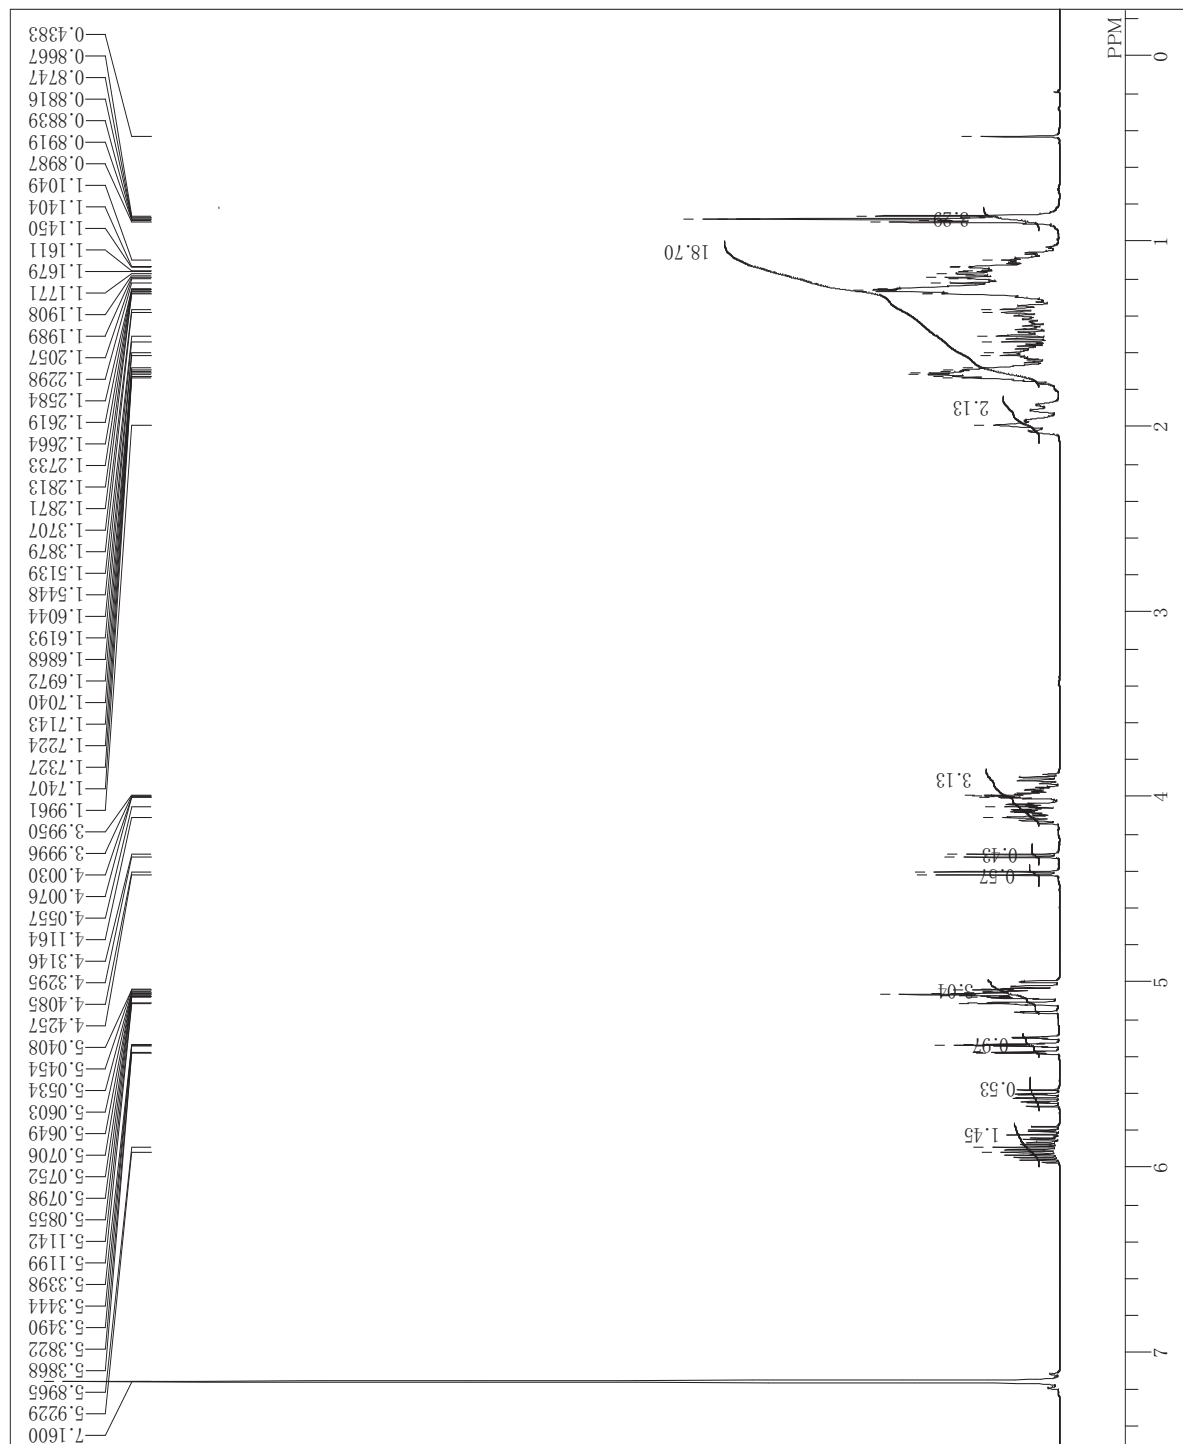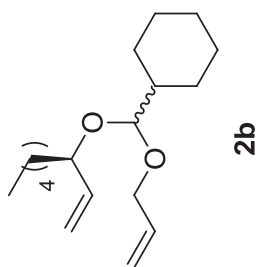

### $^{13}\text{C}$ NMR of **2b**

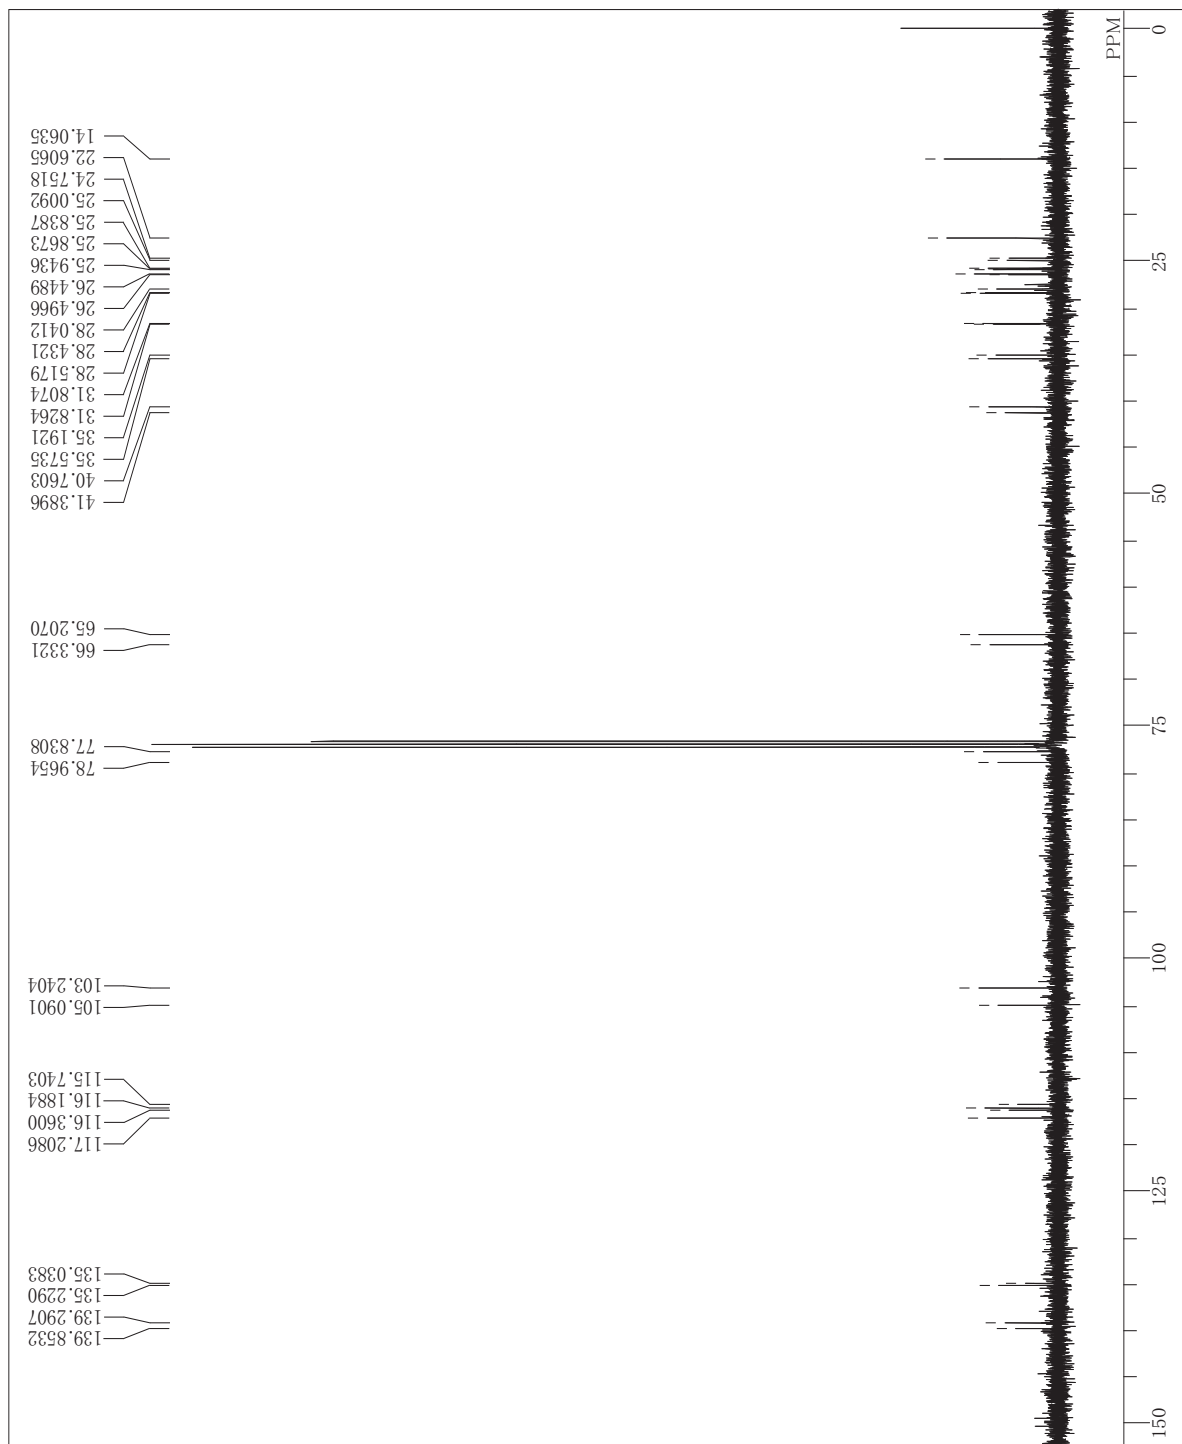

D:\NMR\1-18 张地田\kubo\kubo O.L.,2011.3.11  
single pulse decoupled gated NOE  
07-08-2010 00:54:34  
 $^{13}\text{C}$   
single\_pulse\_dec  
100.53 MHz  
5.35 KHz  
5.86 Hz  
26214  
25125.24 Hz  
1.0433 sec  
2.0000 sec  
3.17 usec  
1H 24.1 c  
CDCL3  
0.00 ppm  
0.12 Hz  
60

DFILE  
COMNT  
DATIM  
OBNUC  
EXMOD  
OBFRQ  
OBSET  
OBFIN  
POINT  
FREQU  
SCANS  
ACQTM  
PD  
PWI  
IRNUC  
CTEMP  
SLVNT  
EXREF  
BF  
RGAIN

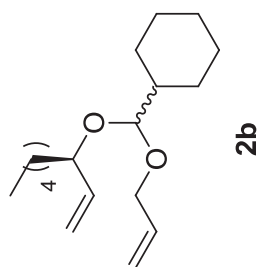

<sup>1</sup>H NMR of 2c

D:FILE  
COMINT  
D:ATIM  
O:BNUC  
EXMOD  
O:BFKQ  
O:BESE  
O:BFIN  
POINT  
FREQU  
SCANS  
ACQTM  
PD  
PWI  
IRNUC  
C:TEMP  
SLVNT  
EXREF  
BF  
RGAIN

C:\Documents and Settings\User\My Documents  
single\_pulse  
07-08-2010 23:04:18  
1H  
single\_pulse.ex2  
399.78 MHz  
4.19 KHz  
7.29 Hz  
13107  
6002.31 Hz  
8  
2.1837 sec  
5.0000 sec  
5.35 usec  
1H 23.9 c  
CDCl3  
0.00 ppm  
0.12 Hz  
44

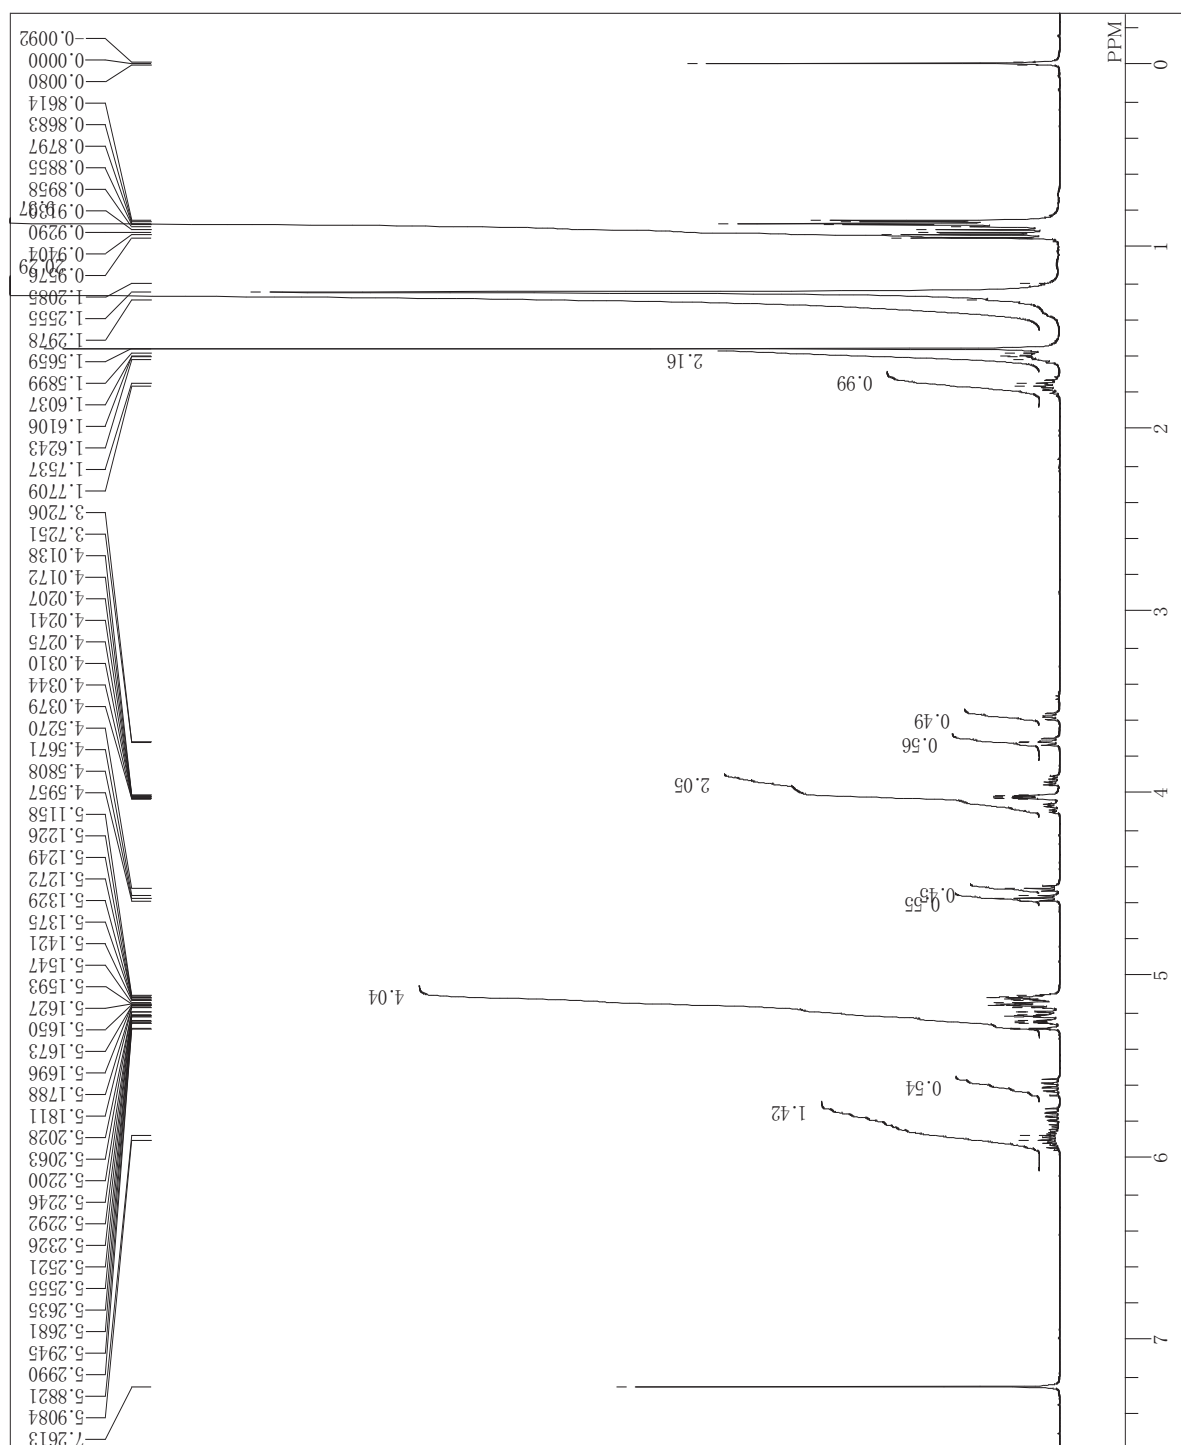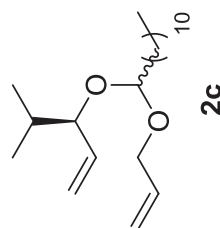

### $^{13}\text{C}$ NMR of **2c**

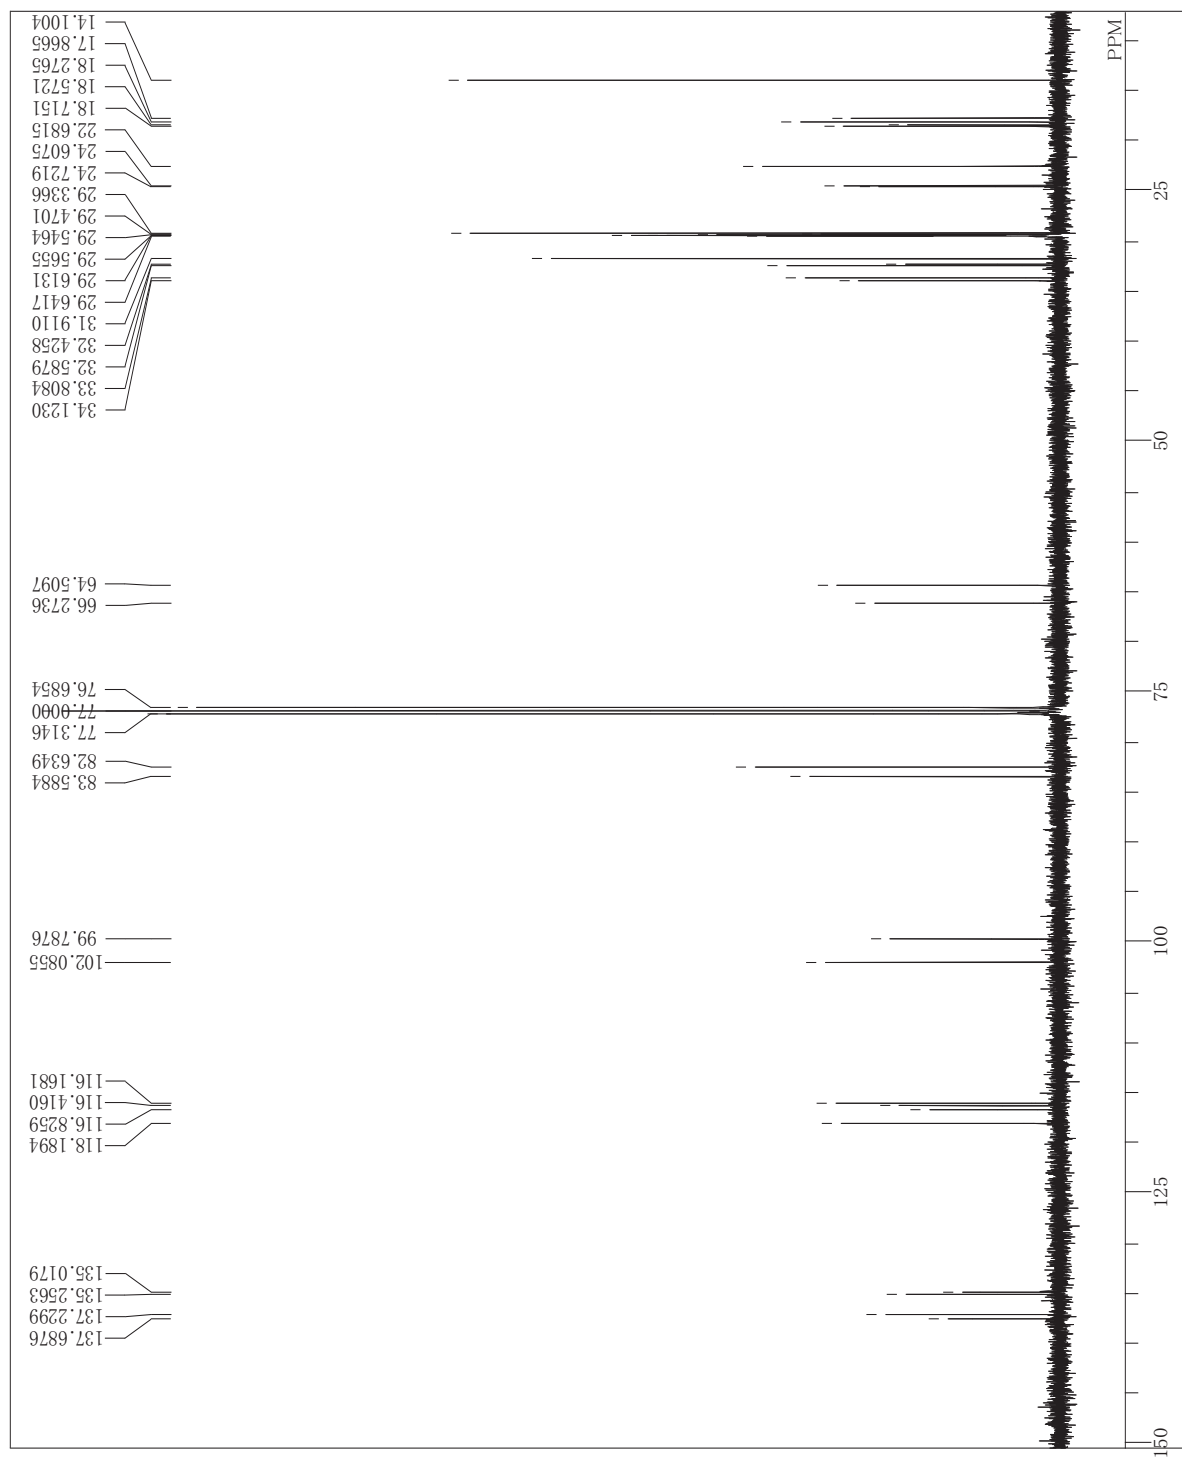

D:FNMR 19-08-2010 14:56:36  
single pulse decoupled gated NOE  
 $^{13}\text{C}$   
single\_pulse\_dec  
100.53 MHz  
5.35 KHz  
5.86 Hz  
2621.4  
25125.24 Hz  
266  
1.0433 sec  
2.0000 sec  
3.17 usec  
1H 24.1 c  
CDCL3  
77.00 ppm  
0.12 Hz  
60

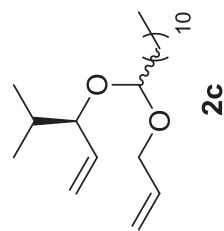

D:FNMR 19-08-2010 14:56:36  
single pulse decoupled gated NOE  
 $^{13}\text{C}$   
single\_pulse\_dec  
100.53 MHz  
5.35 KHz  
5.86 Hz  
2621.4  
25125.24 Hz  
266  
1.0433 sec  
2.0000 sec  
3.17 usec  
1H 24.1 c  
CDCL3  
77.00 ppm  
0.12 Hz  
60

<sup>1</sup>H NMR of 2d

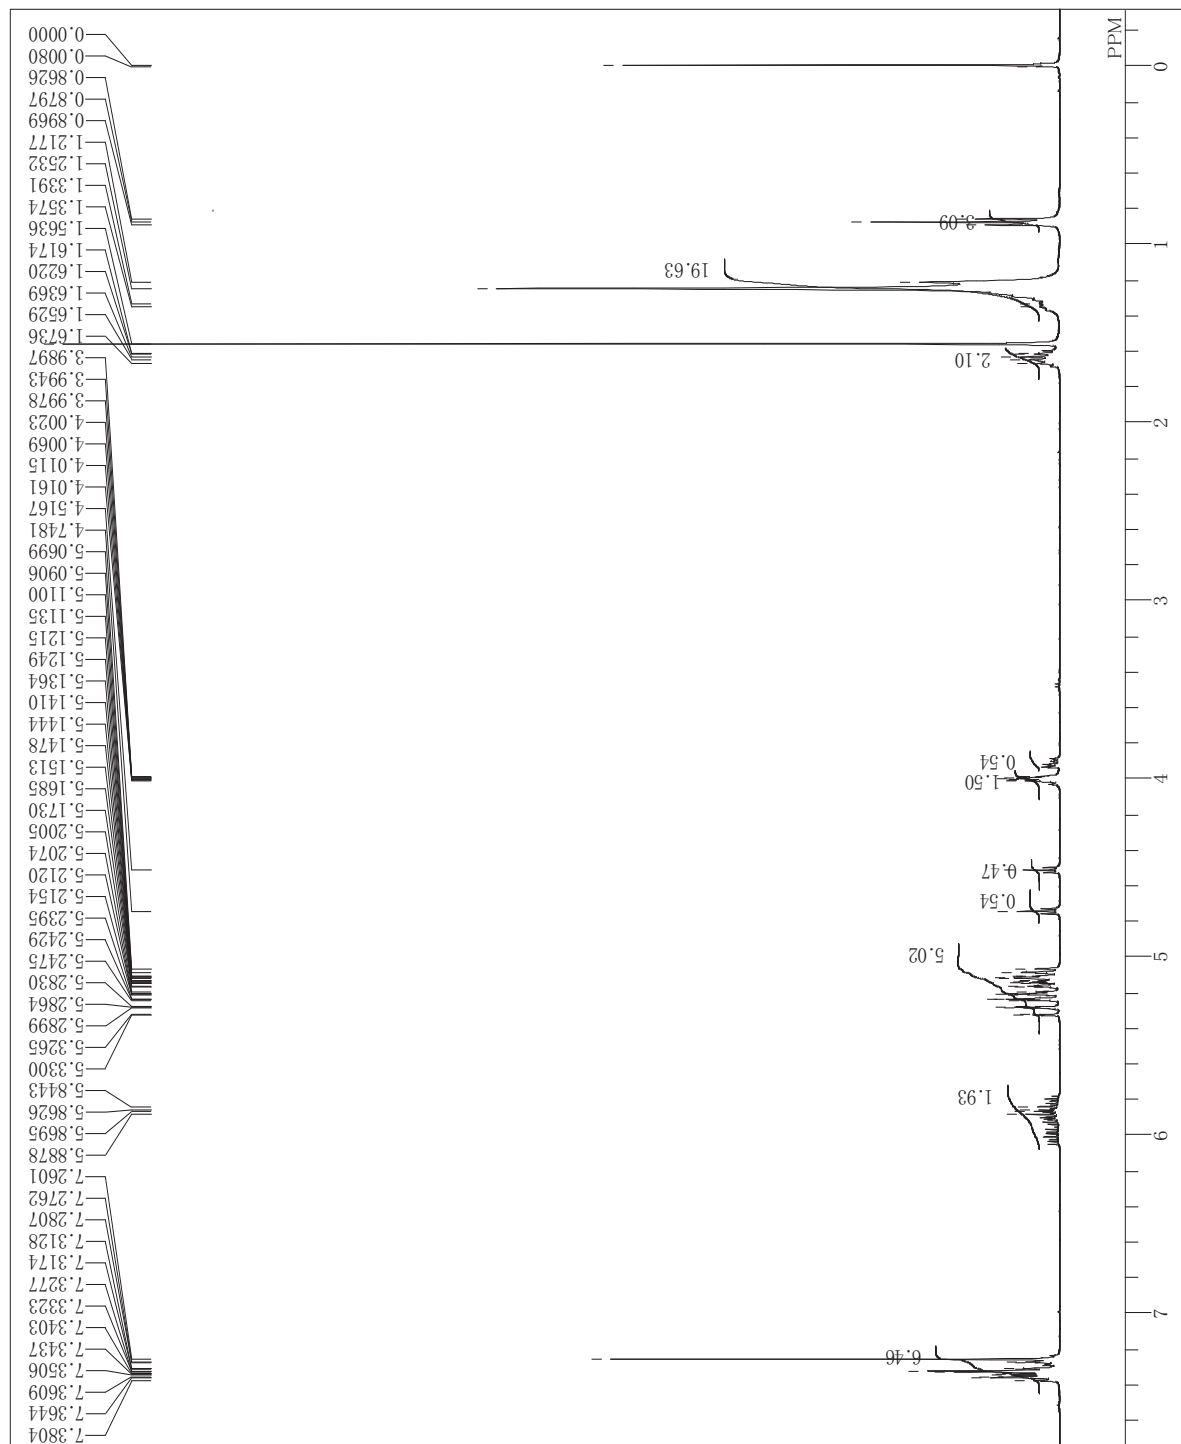

D1FILE  
 COMINT  
 DATIM  
 OBNUC  
 EXMOD  
 OBFREQ  
 OBSSET  
 OBFIN  
 POINT  
 FREQU  
 SCANS  
 ACQTM  
 PD  
 PW1  
 IRNUC  
 CTEMP  
 SLVNT  
 EXREF  
 BF  
 RGAIN

C:\Documents and Settings\User\My Documents  
 single\_pulse  
 07-08-2010 22:57:11  
 1H  
 single\_pulse.ex2  
 399.78 MHz  
 4.19 KHz  
 7.29 Hz  
 13107  
 6002.31 Hz  
 8  
 2.1837 sec  
 5.0000 sec  
 5.35 usec  
 1H  
 23.5 c  
 CDCl3  
 0.00 ppm  
 0.12 Hz  
 44

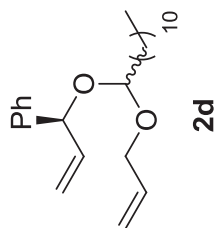

# <sup>13</sup>C NMR of 2d

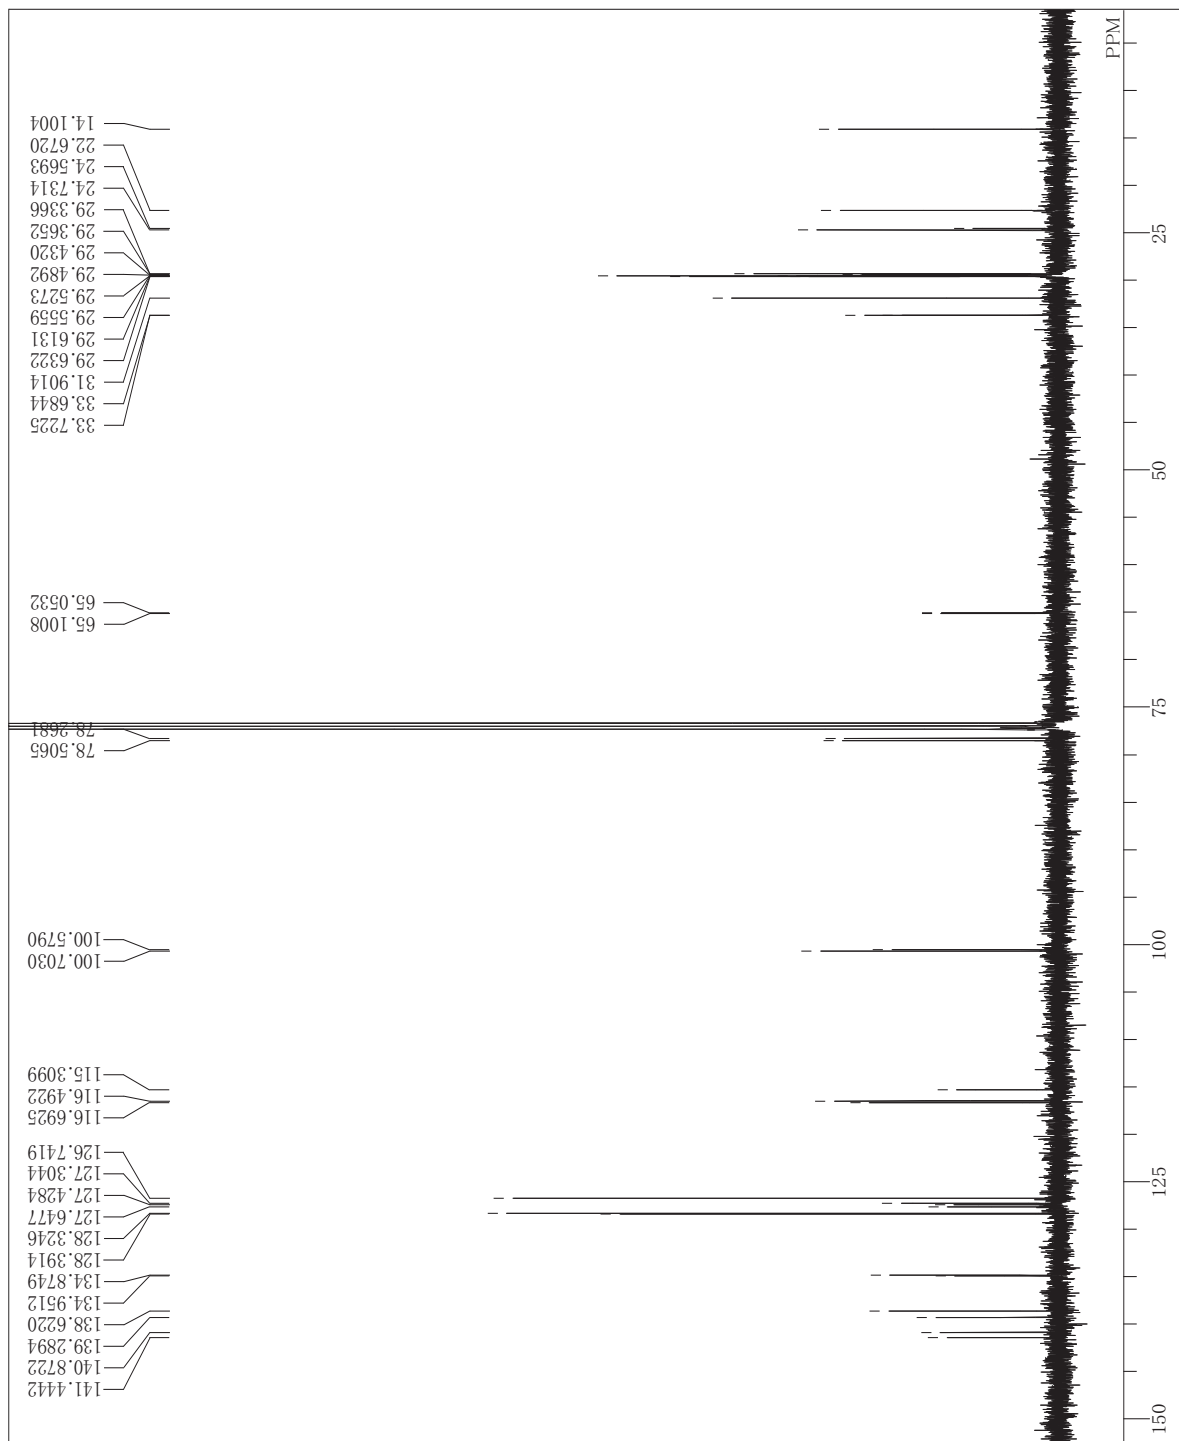

DELF  
COMNT  
D.ATIM  
OBNUC  
EXMOD  
OBPRQ  
OBSET  
OBFIN  
POINT  
FREQU  
SC/ANS  
ACQTM  
PD  
PWI  
IRNUC  
C/TEMP  
SLVNT  
EXREF  
BF  
RGAIN

D:\NMR\1-10-2011\Ykubo\Ykubo O.L.,2011.3.11  
single pulse decoupled gated NOE  
13C  
single\_pulse.dec

100.53 MHz  
5.35 KHz  
5.86 Hz  
2621.4  
25125.24 Hz  
402  
1.0433 sec  
2.0000 sec  
3.17 usec  
1H  
23.8 c  
CDCl3  
77.00 ppm  
0.12 Hz  
60

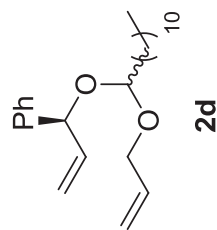



<sup>1</sup>H NMR of cis-4a

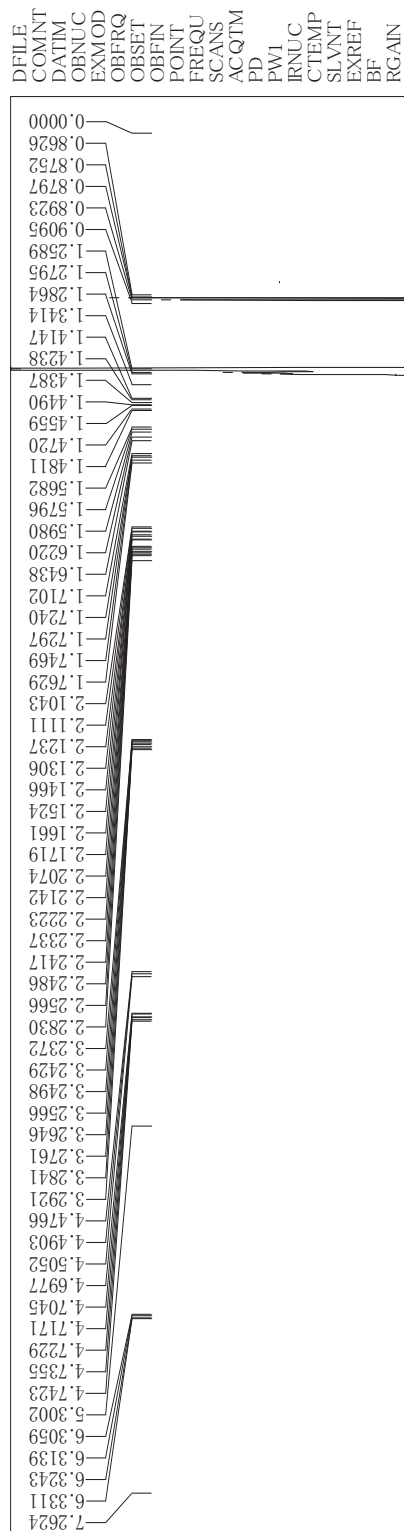

D:\NMR\1-1-2010\24-02-2010\kubo D\3谱-2谱.d  
 single\_pulse  
 24-02-2010 02:52:20  
 1H  
 single\_pulse.ex2  
 399.78 MHz  
 4.19 KHz  
 7.29 Hz  
 13107  
 6002.31 Hz  
 16  
 2.1837 sec  
 5.0000 sec  
 5.35 usec  
 1H  
 21.0 c  
 CDCL3  
 0.00 ppm  
 0.12 Hz  
 30

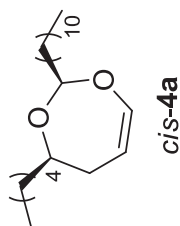

### <sup>13</sup>C NMR of *cis*-4a

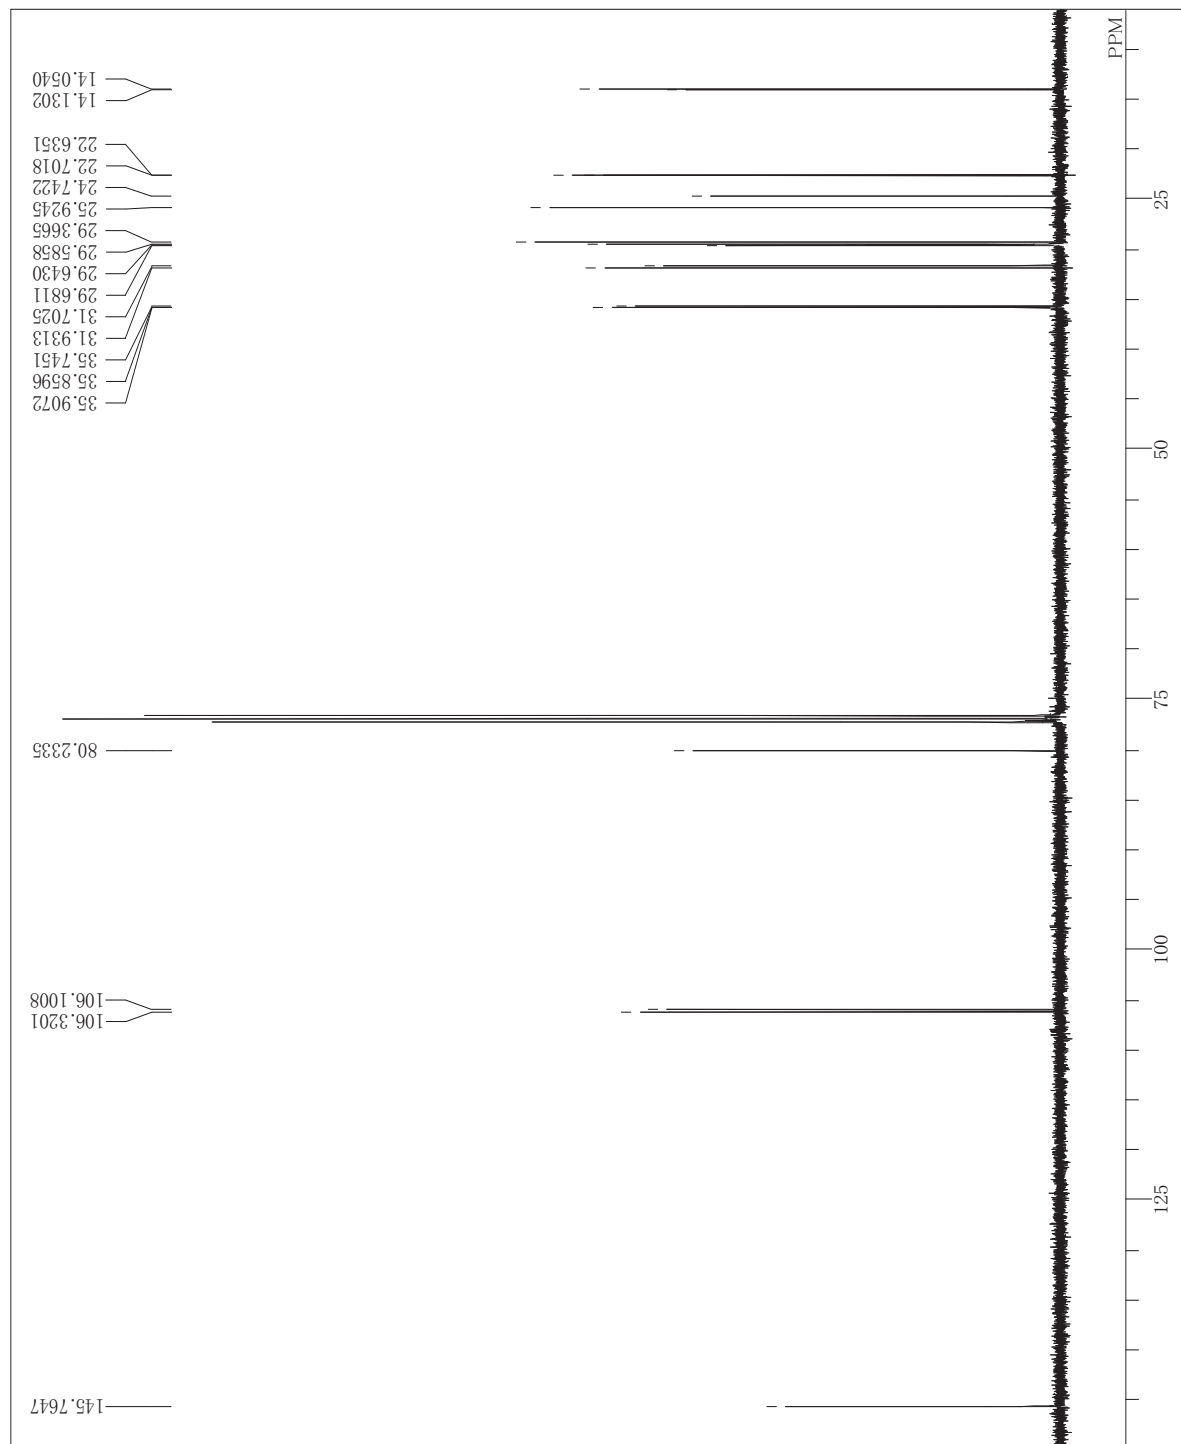

D:FNMR\data\2010\03\47\07  
single pulse decoupled gated NOE  
13C  
single\_pulse\_dec  
100.53 MHz  
5.35 KHz  
5.86 Hz  
2621.4  
25125.24 Hz  
71.4  
1.0433 sec  
2.0000 sec  
3.17 usec  
1H 21.3 c  
CDCL3  
0.00 ppm  
0.12 Hz  
60

DFILE  
COMINT  
D:ATM  
OBNUC  
EXMOD  
OBFREQ  
OBSET  
OBFIN  
POINT  
FREQU  
SCANS  
ACQTM  
PD  
PWI  
IRNUC  
C:TEMP  
SLANT  
EXREF  
BF  
RGAIN

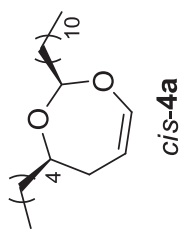



# <sup>13</sup>C NMR of *trans*-4a

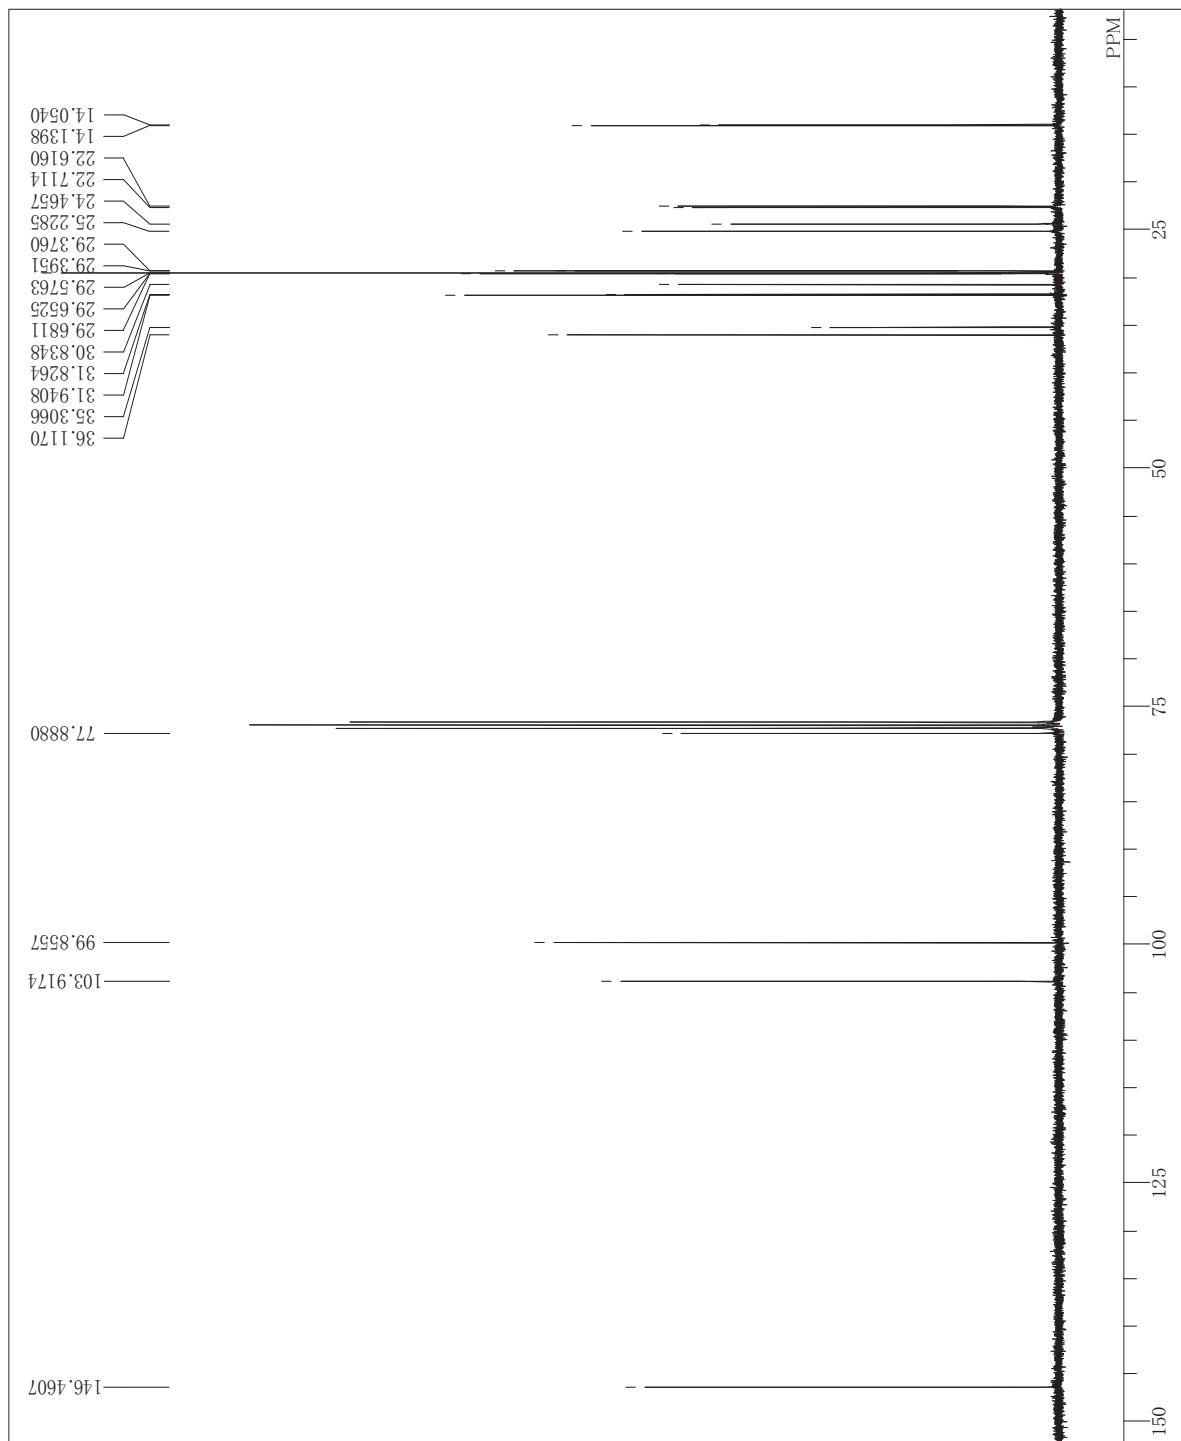

D:FNMR1-1-2011-03-16 16:35:04  
single pulse decoupled gated NOE  
13C  
single\_pulse\_dec  
100.53 MHz  
5.35 KHz  
5.86 Hz  
2621.4  
25125.24 Hz  
781  
1.0433 sec  
2.0000 sec  
3.17 usec  
1H 21.6 c  
CDCl<sub>3</sub>  
0.00 ppm  
0.12 Hz  
60

D:FNMR1-1-2011-03-16 16:35:04  
single pulse decoupled gated NOE  
13C

single\_pulse\_dec  
100.53 MHz  
5.35 KHz  
5.86 Hz  
2621.4  
25125.24 Hz  
781  
1.0433 sec  
2.0000 sec  
3.17 usec  
1H 21.6 c  
CDCl<sub>3</sub>  
0.00 ppm  
0.12 Hz  
60

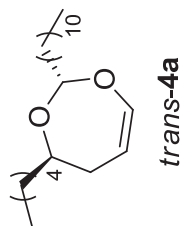

<sup>1</sup>H NMR of 4b

D:FNMR1-1-1 磁化回波kubo D 磁化回波 2磁化  
single\_pulse  
08-08-2010 21:17:06  
IH  
single\_pulse.ex2  
399.78 MHz  
4.19 KHz  
7.29 Hz  
13107  
6002.31 Hz  
2.1837 sec  
5.0000 sec  
5.35 usec  
IH 23.6 c  
CDCL3  
0.00 ppm  
0.12 Hz  
40

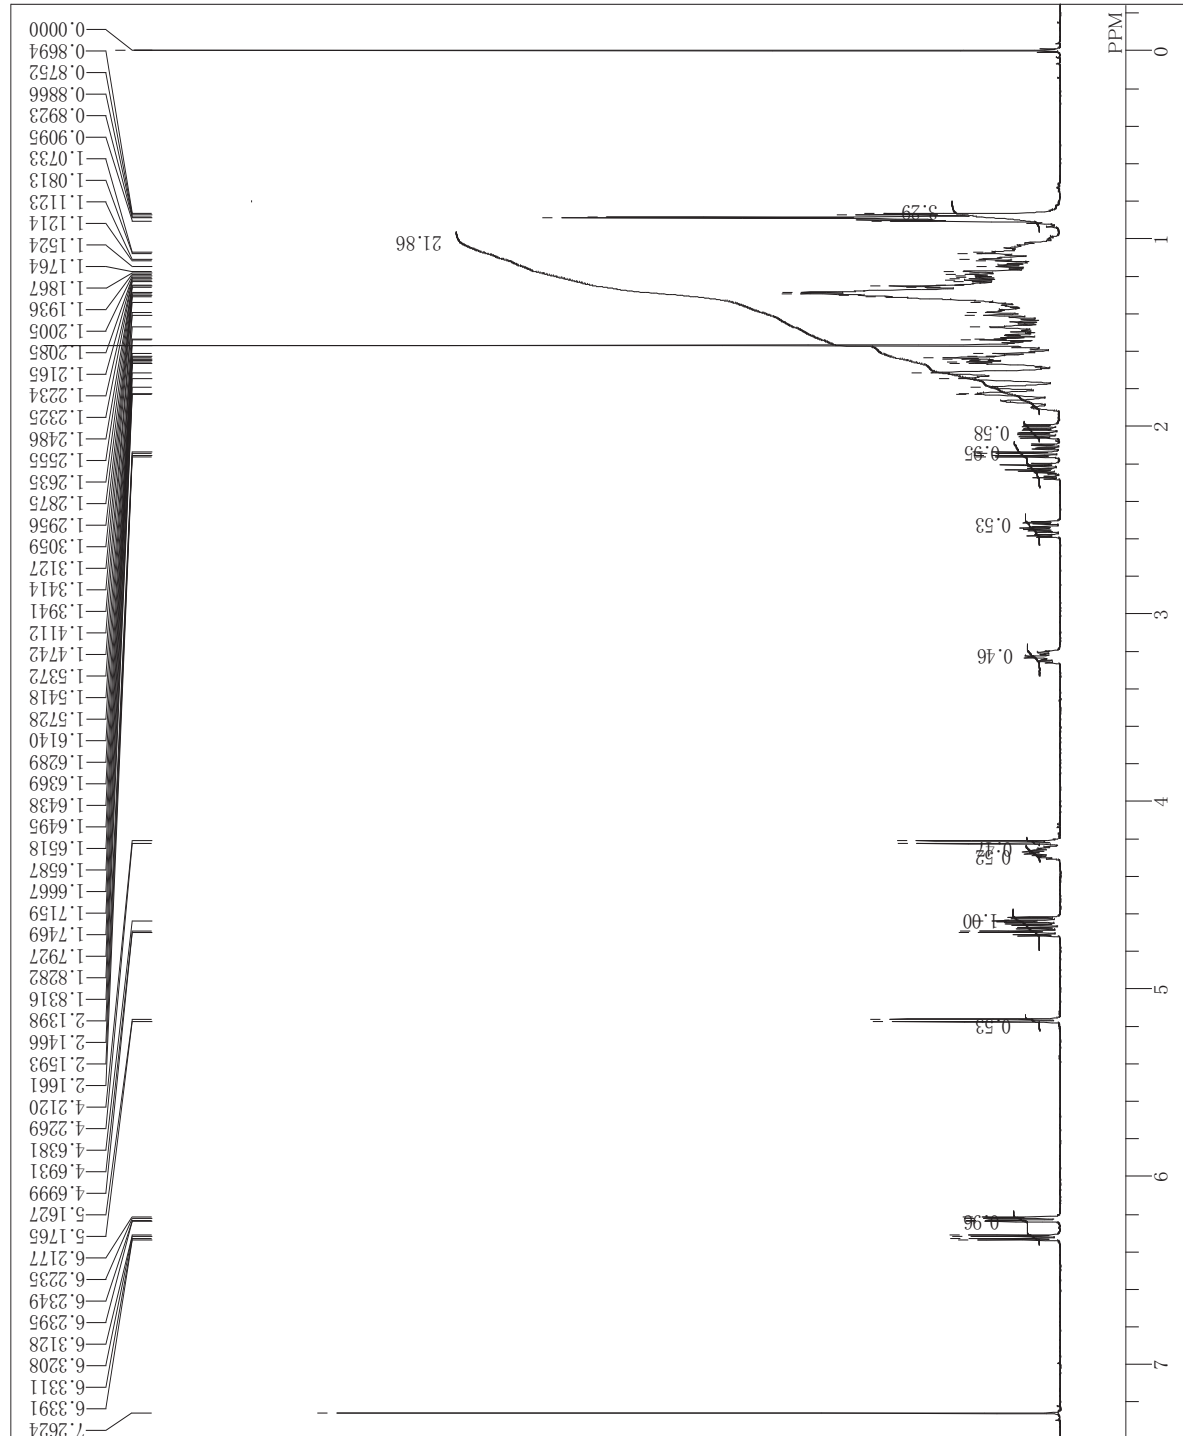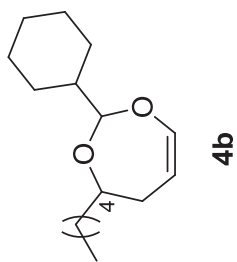

### <sup>13</sup>C NMR of 4b

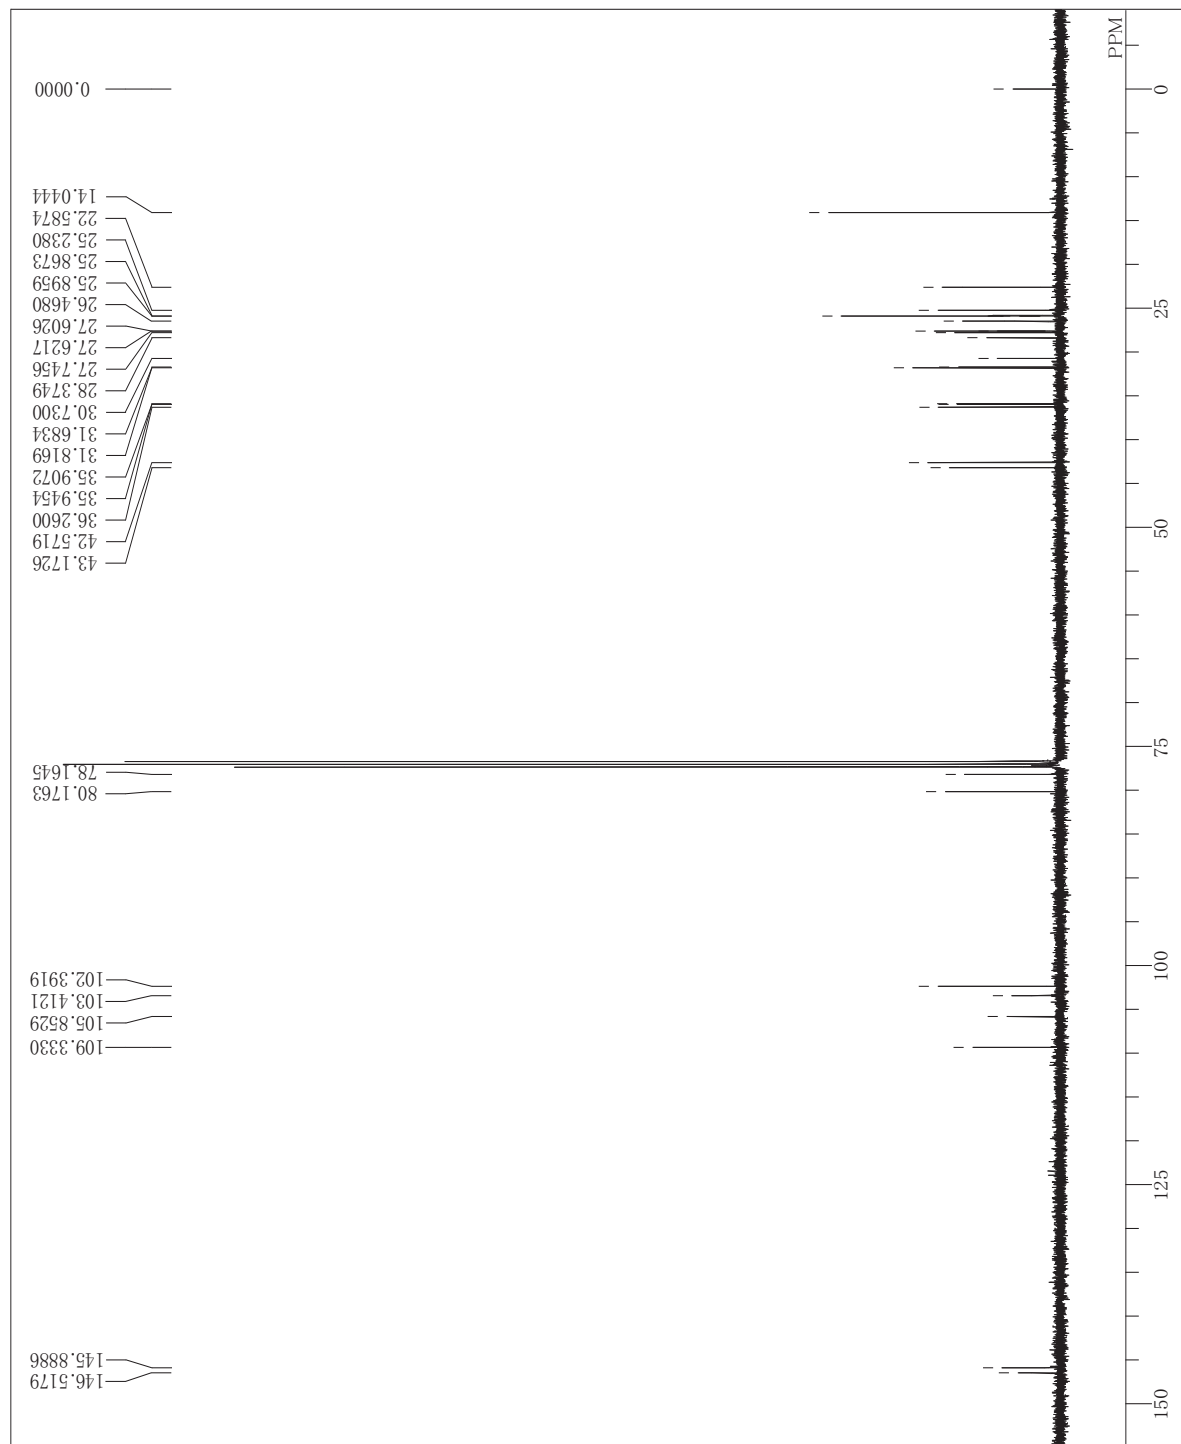

D:FNMR  
COMNT  
D:ATM  
OBNUC  
EXMOD  
OBFREQ  
OBSSET  
OBFIN  
POINT  
FREQU  
SCANS  
ACQTM  
PD  
PWI  
IRNUC  
C:TEMP  
SLVNT  
EXREF  
BF  
RGAIN

single\_pulse\_dec  
08-08-2010 21:57:51  
13C  
single\_pulse\_dec  
100.53 MHz  
5.35 KHz  
5.86 Hz  
2621.4  
25125.24 Hz  
791  
1.0433 sec  
2.0000 sec  
3.17 usec

1H 24.3 c  
CDCL3  
0.00 ppm  
0.12 Hz  
60

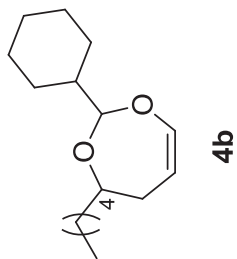

# <sup>1</sup>H NMR of 4c

D:FILE  
COMINT  
D:ATIM  
O:BNUC  
EXMOD  
O:BFKQ  
O:BSFT  
O:BFIN  
POINT  
FREQU  
SCANS  
ACQTM  
PD  
PWI  
IRNUC  
C:TEMP  
SLANT  
EXREF  
BF  
RGAIN

C:\Documents and Settings\user\My Documents  
single\_pulse  
13-01-2011 20:13:12  
1H  
single\_pulse.ex2  
399.78 MHz  
4.19 KHz  
7.29 Hz  
16384  
7503.00 Hz  
2.1837 sec  
5.0000 sec  
5.35 usec  
1H  
22.2 c  
CDCl<sub>3</sub>  
0.00 ppm  
1.22 Hz  
28

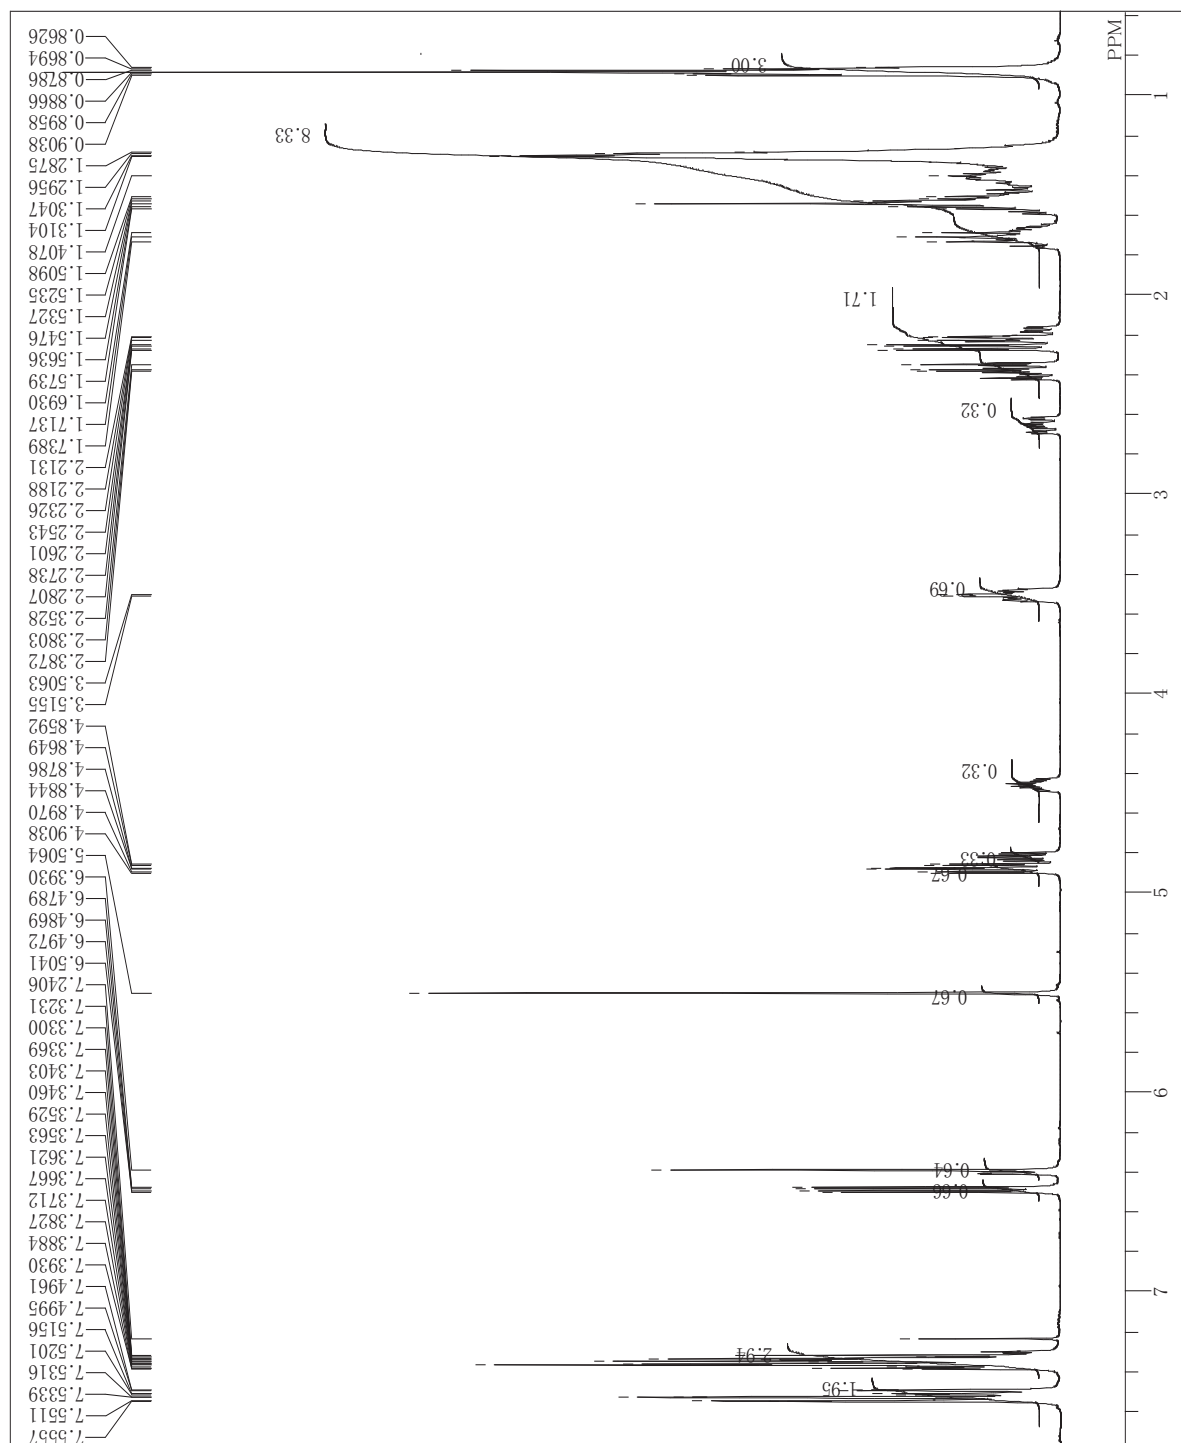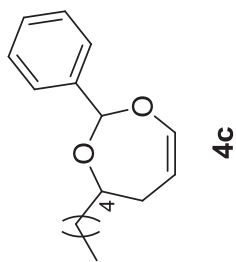

### <sup>13</sup>C NMR of **4c**

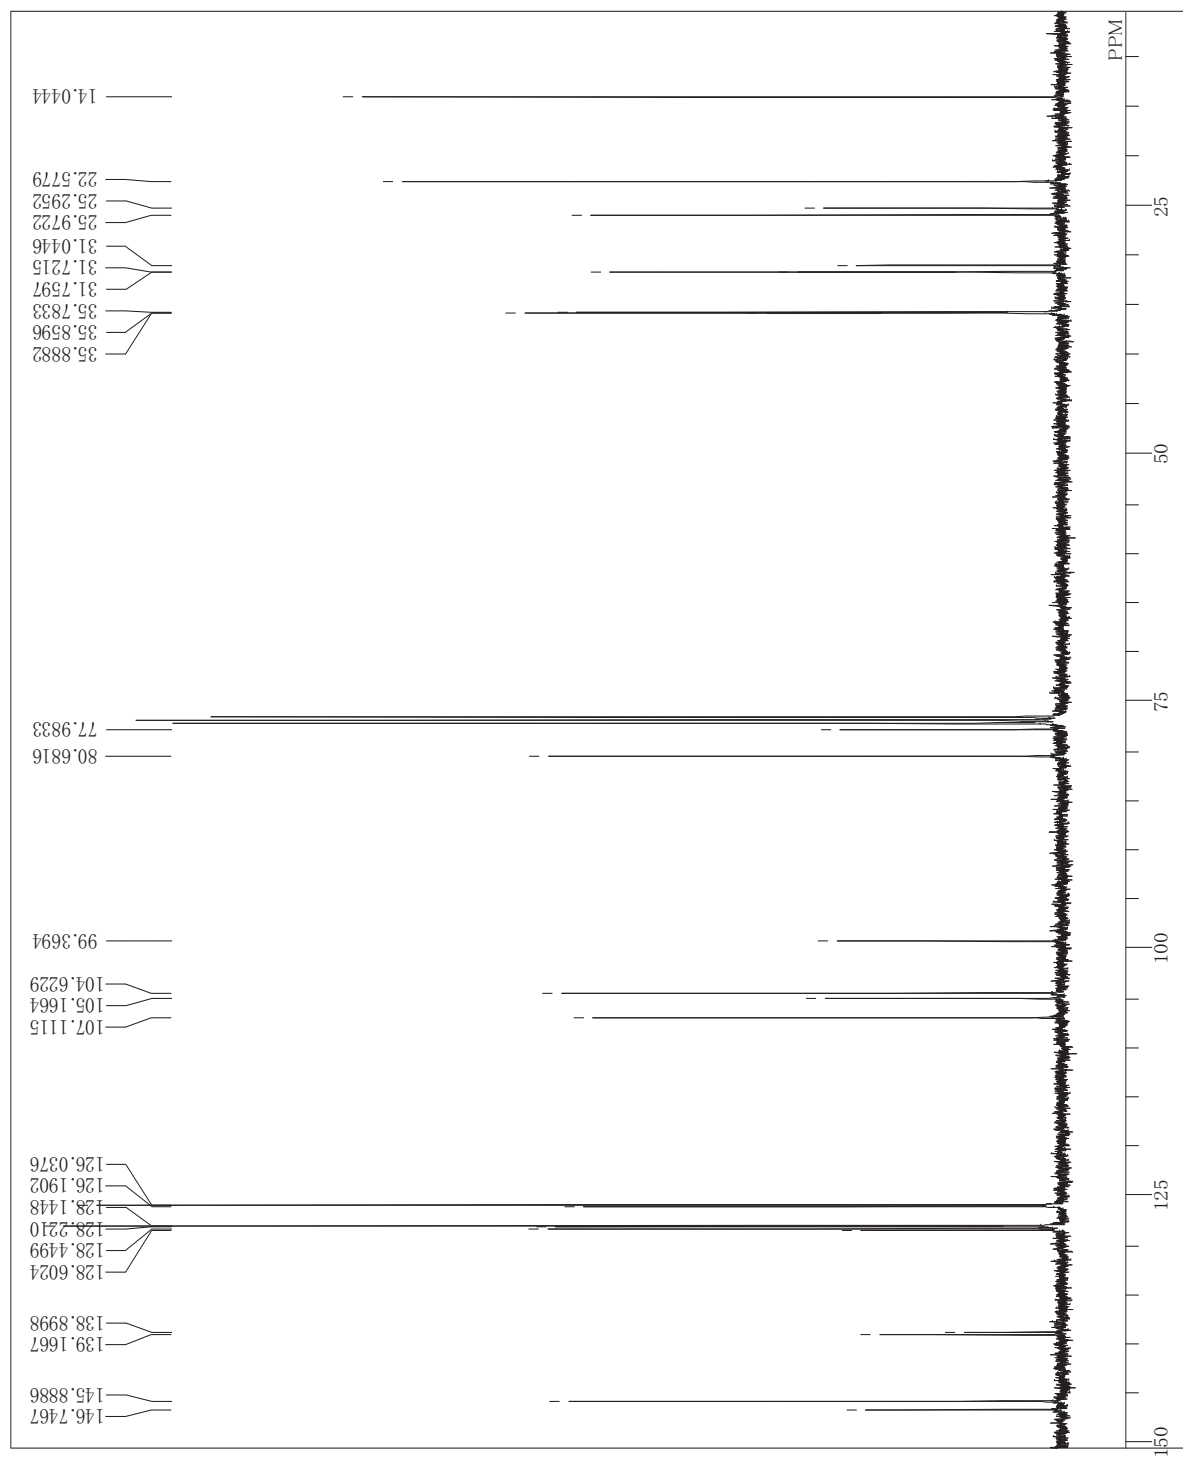

D:FILE  
COMNT  
D:ATM  
OBNUC  
EXMOD  
OBF1RQ  
OBS1ET  
OBF1N  
POINT  
FREQU  
SCANS  
ACQTM  
PD  
PWI  
IRNUC  
C:TEMP  
SLVNT  
EXREF  
BF  
RGAIN

D:\NMR\1-15-2011\Ykubo\Ykubo O.L.2011.3.1:  
single pulse decoupled gated NOE  
13-01-2011 20:08:52  
13C

single\_pulse\_dec  
100.53 MHz  
5.35 KHz  
5.86 Hz  
2621.4  
25125.24 Hz  
266  
1.0433 sec  
2.0000 sec  
3.17 usec  
1H 22.2 c  
CDCL3  
0.00 ppm  
1.22 Hz  
60

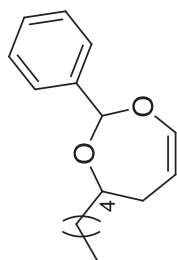

**4c**





### $^{13}\text{C}$ NMR of 4d

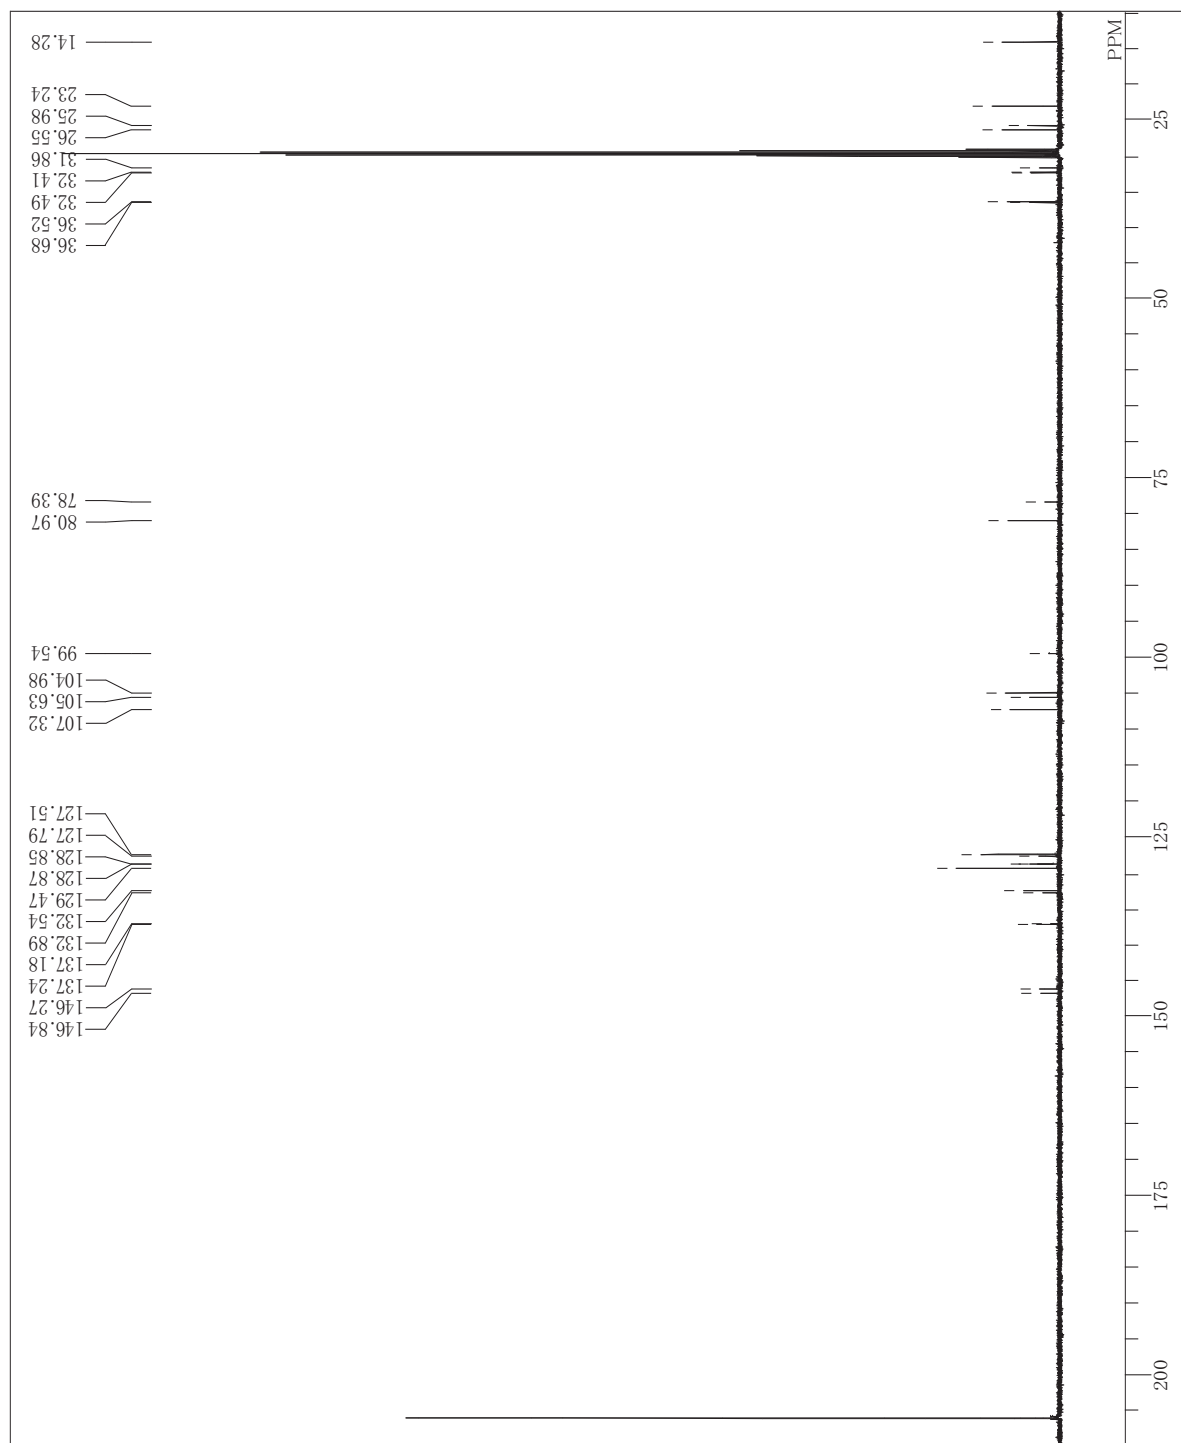

D:FILE  
COMINT  
D:ATM  
OBNUC  
EXMOD  
OBFPRQ  
OBSSET  
OBFIN  
POINT  
FREQU  
SCANS  
ACQTM  
PD  
PW1  
IRNUC  
C:TEMP  
SLVNT  
EXREF  
BF  
RGAIN

C:\Documents and Settings\User\My Documents  
single pulse decoupled gated NOE  
16-09-2010 21:09:06  
13C

single\_pulse\_dec  
100.53 MHz  
5.35 KHz  
5.86 Hz  
26214  
25125.24 Hz  
418  
1.0433 sec  
2.0000 sec  
3.17 usec  
1H 24.1 c  
ACETN  
29.80 ppm  
0.12 Hz  
60

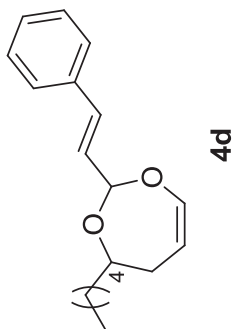

# <sup>1</sup>H NMR of 4e

D:FNMR1-1-1-1 25-08-2010 16:08:10  
single\_pulse  
IH  
single\_pulse.ex2  
399.78 MHz  
4.19 KHz  
7.29 Hz  
13107  
6002.31 Hz  
16  
2.1837 sec  
5.0000 sec  
5.35 usec  
IH 23.6 c  
CDCl3  
0.00 ppm  
0.12 Hz  
38

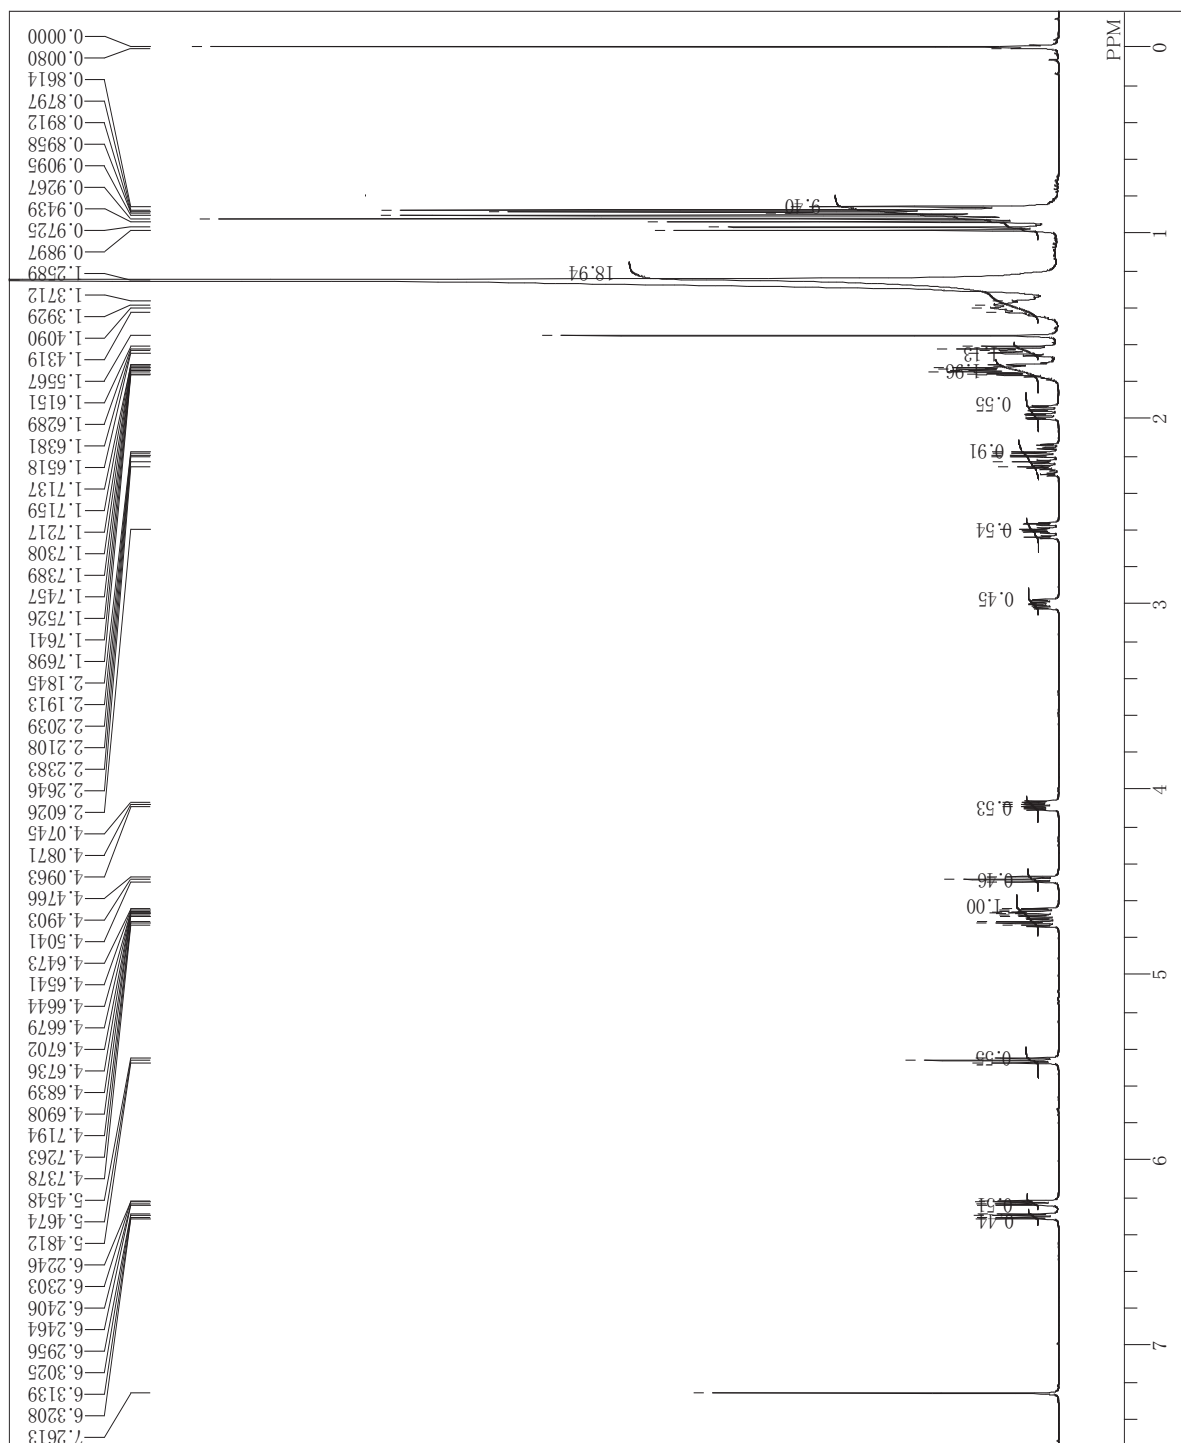



<sup>1</sup>H NMR of 4f

D:\NMR\1-1-1- 25-08-2010 14:21:43  
 single\_pulse  
 IH  
 single\_pulse.ex2  
 399.78 MHz  
 4.19 KHz  
 7.29 Hz  
 13107  
 6002.31 Hz  
 8  
 2.1837 sec  
 5.0000 sec  
 5.35 usec  
 IH 23.8 °C  
 CDCL3  
 0.00 ppm  
 0.12 Hz  
 40

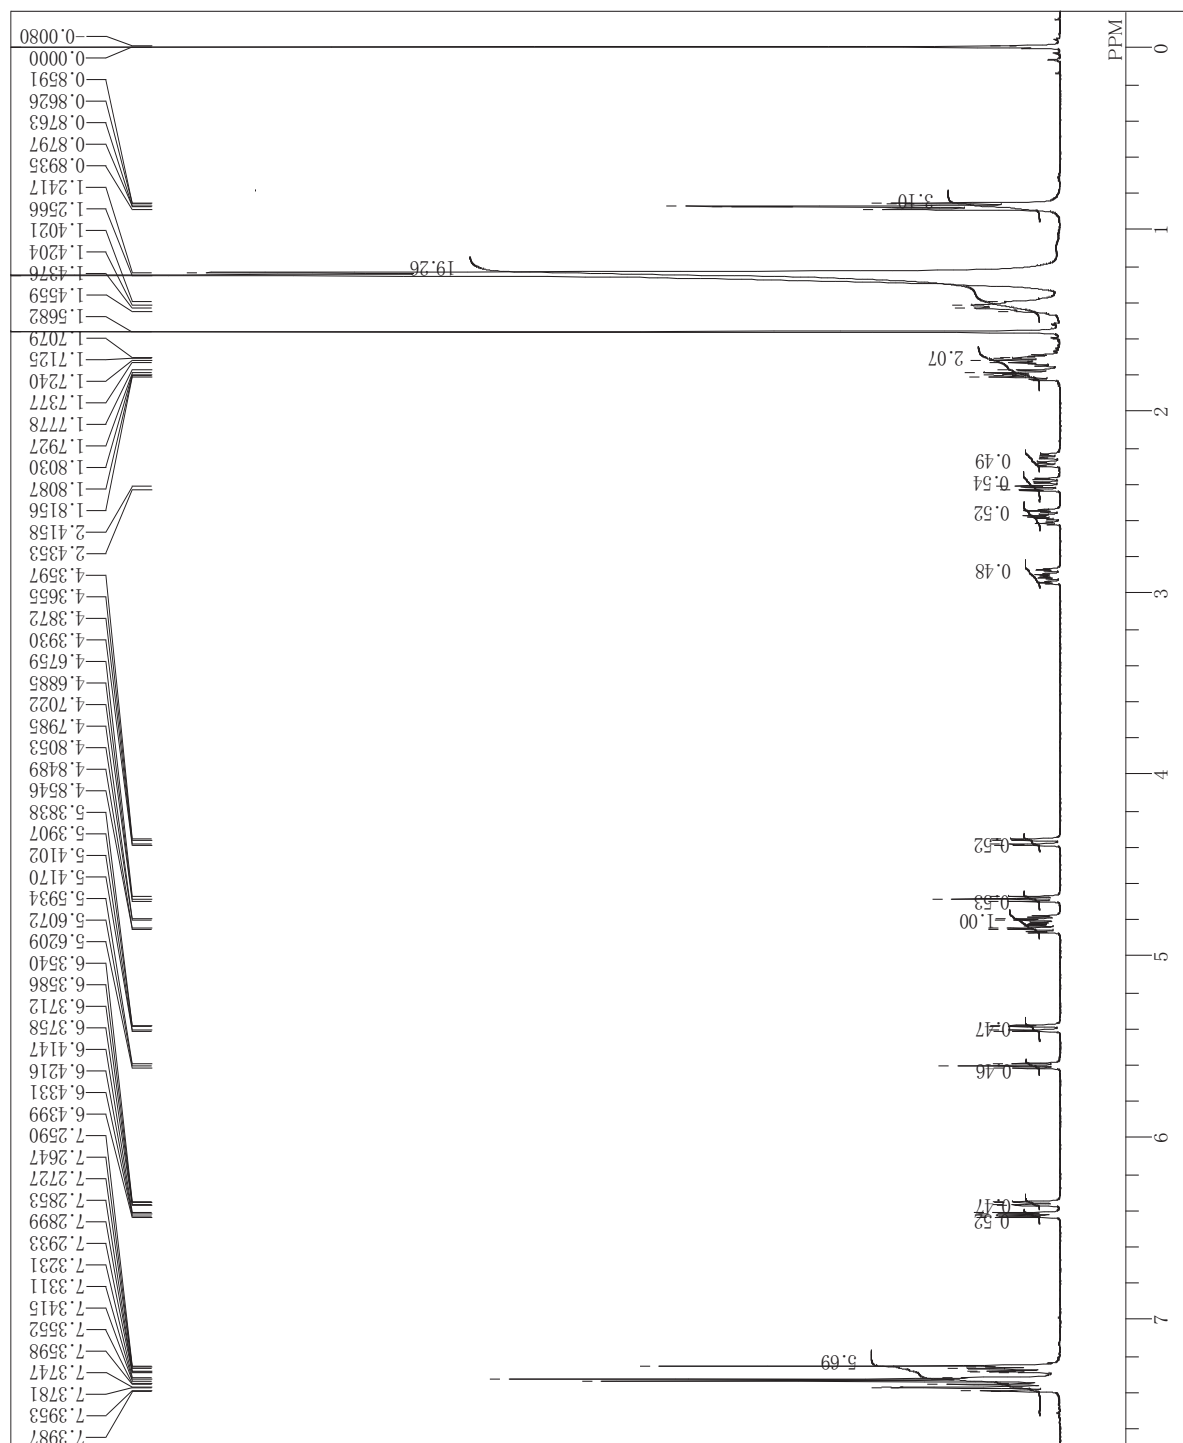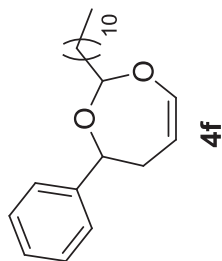

### <sup>13</sup>C NMR of 4f

D:FILE  
COMINT  
D:ATIM  
O:NUC  
EXMOD  
O:FRQ  
O:SET  
O:FIN  
POINT  
FREQU  
SCANS  
ACQTM  
PD  
PWI  
IRNUC  
C:TEMP  
SLANT  
EXREF  
BF  
RGAIN

D:\NMR\1-10-2011\1111\kubo\kubo D\data\3\1012\data.d  
single pulse decoupled gated NOE  
25-08-2010 22:32:05  
13C

single\_pulse\_dec  
100.53 MHz  
5.35 KHz  
5.86 Hz  
2621.4  
25125.24 Hz  
308  
1.0433 sec  
2.0000 sec  
3.17 usec  
1H 24.2 c  
CDCL3  
77.00 ppm  
0.12 Hz  
60

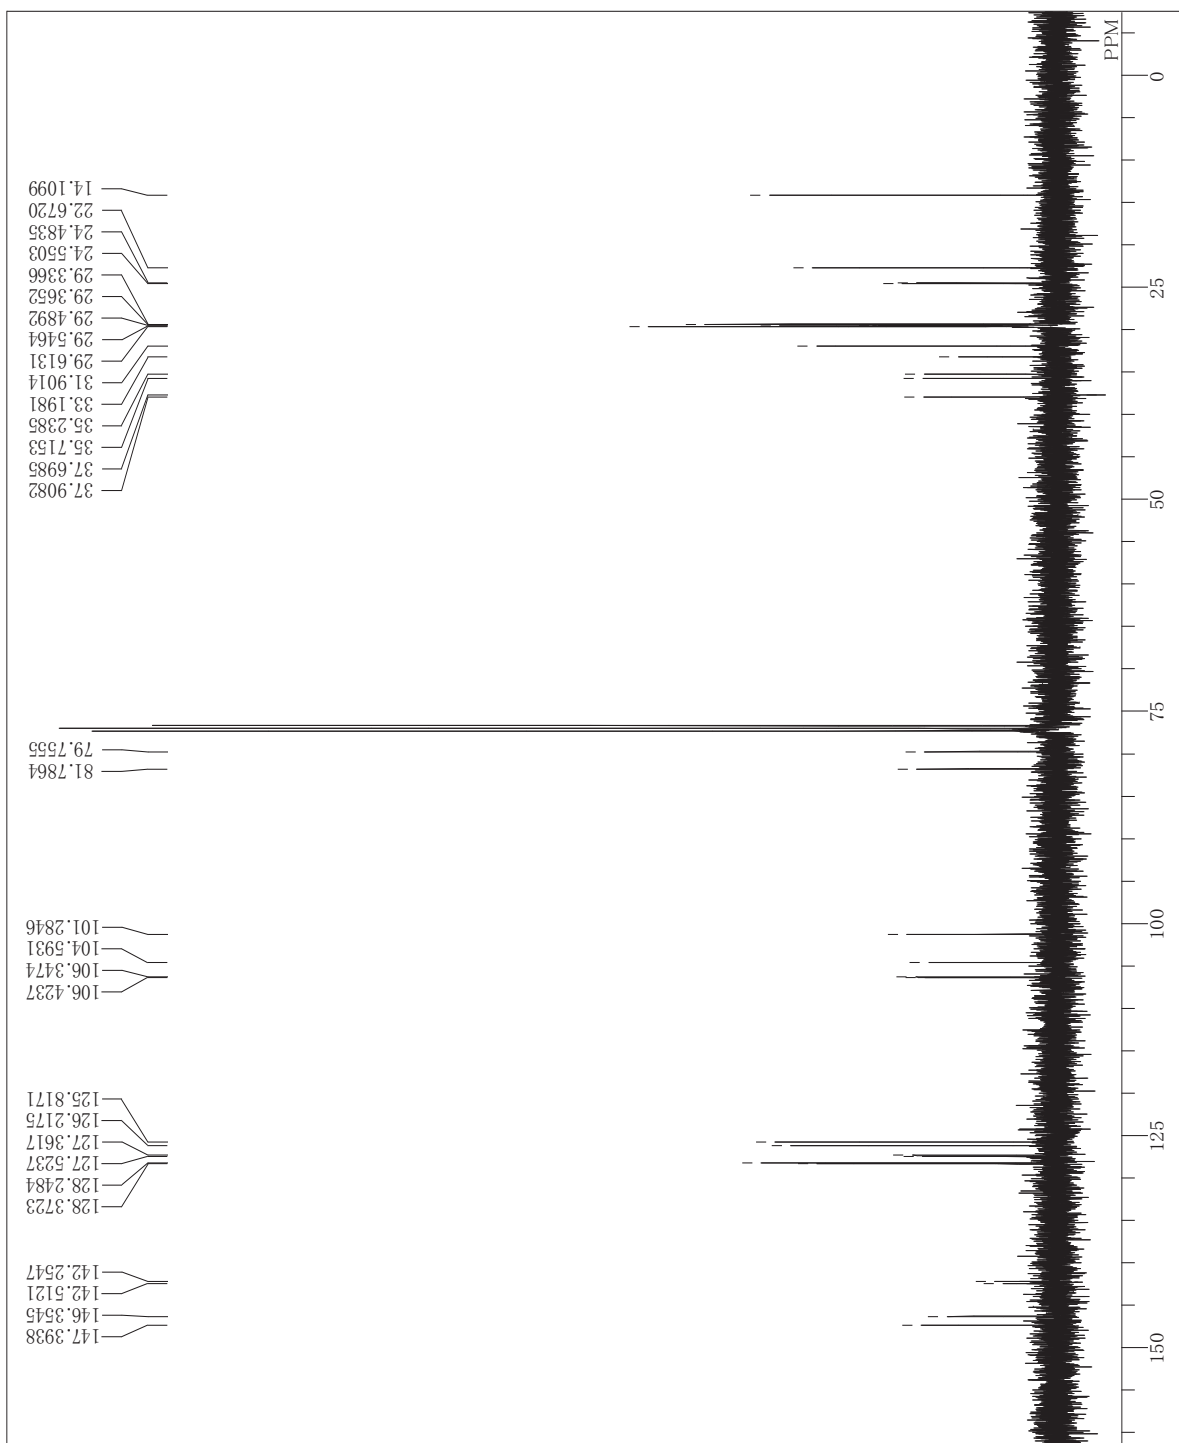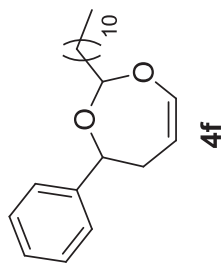

# <sup>1</sup>H NMR of 14a

D:FILE  
COMINT  
D:ATM  
O:NUC  
EXMOD  
O:FRQ  
O:SET  
O:FIN  
POINT  
FREQU  
SCANS  
ACQTM  
PD  
PWI  
IRNUC  
C:TEMP  
SLVNT  
EXREF  
BF  
RGAIN

C:\Documents and Settings\User\My Documents  
1288 1H 500 CDC13  
Wed Jan 12 17:22:20 2011  
IH non  
500.00 MHz  
0.00 KHz  
162160.00 Hz  
16384  
10000.00 Hz  
32  
1.6384 sec  
5.3616 sec  
5.15 usec  
IH 23.5 c  
CDCL3  
7.26 ppm  
0.12 Hz  
12

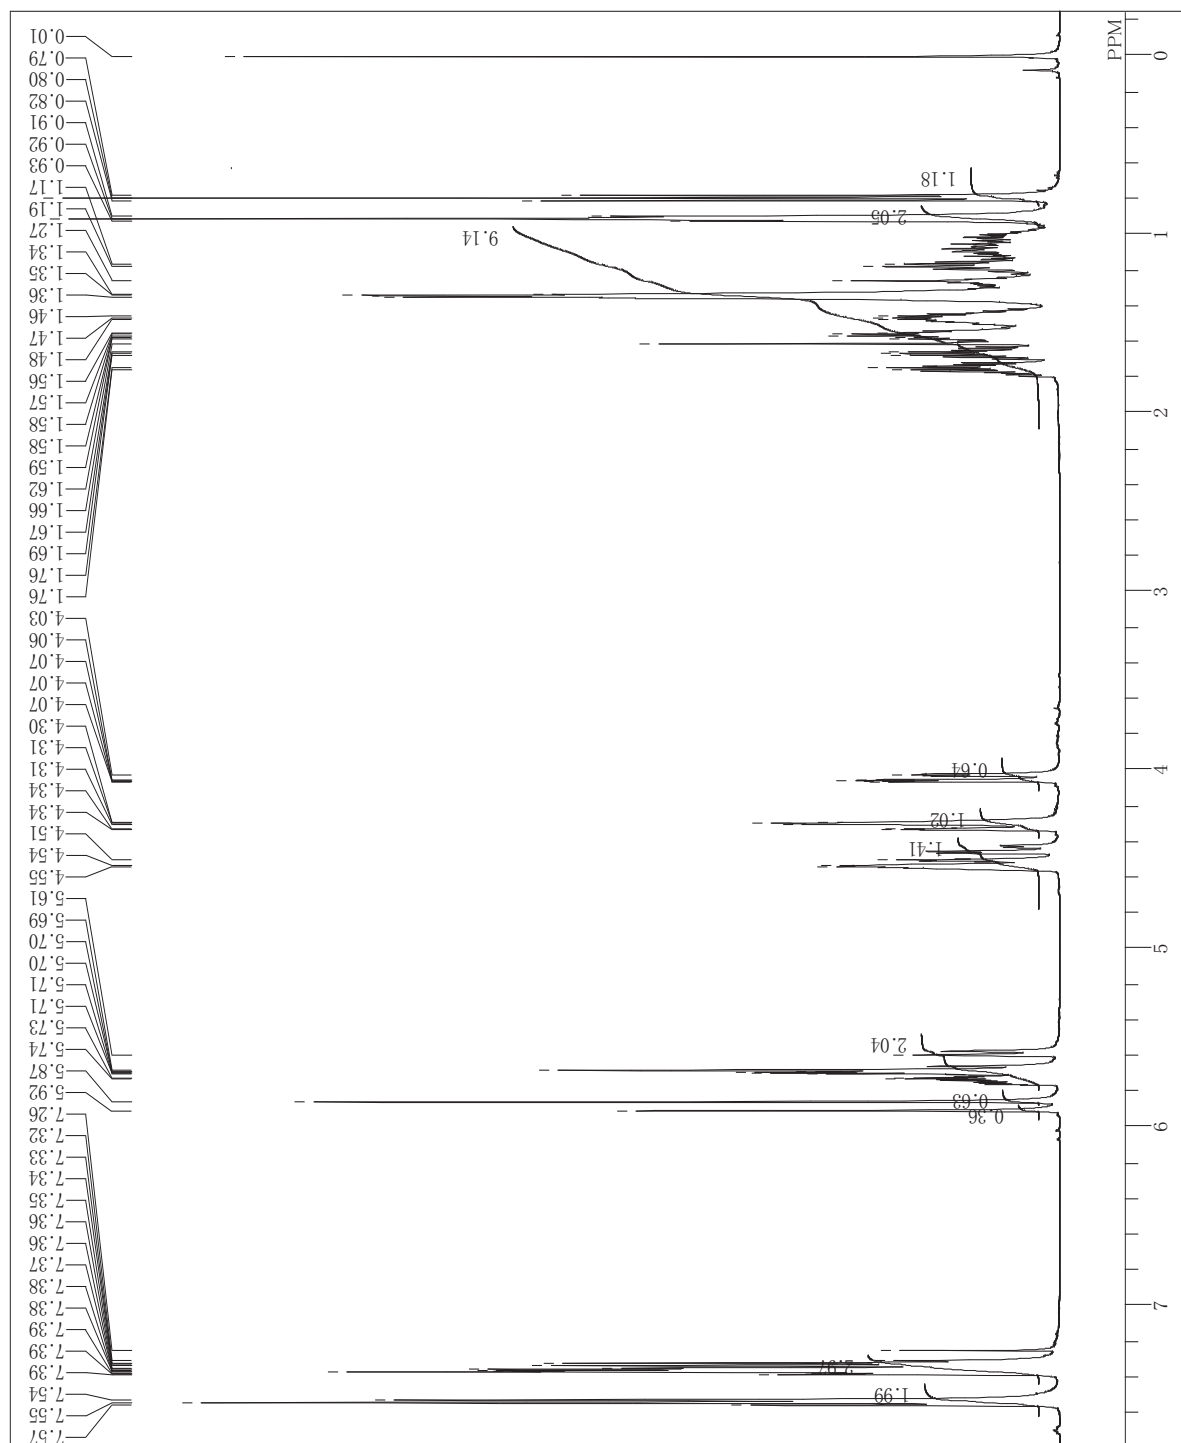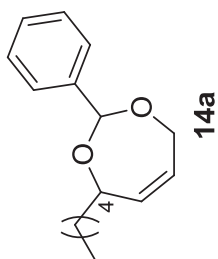

### <sup>13</sup>C NMR of **14a**

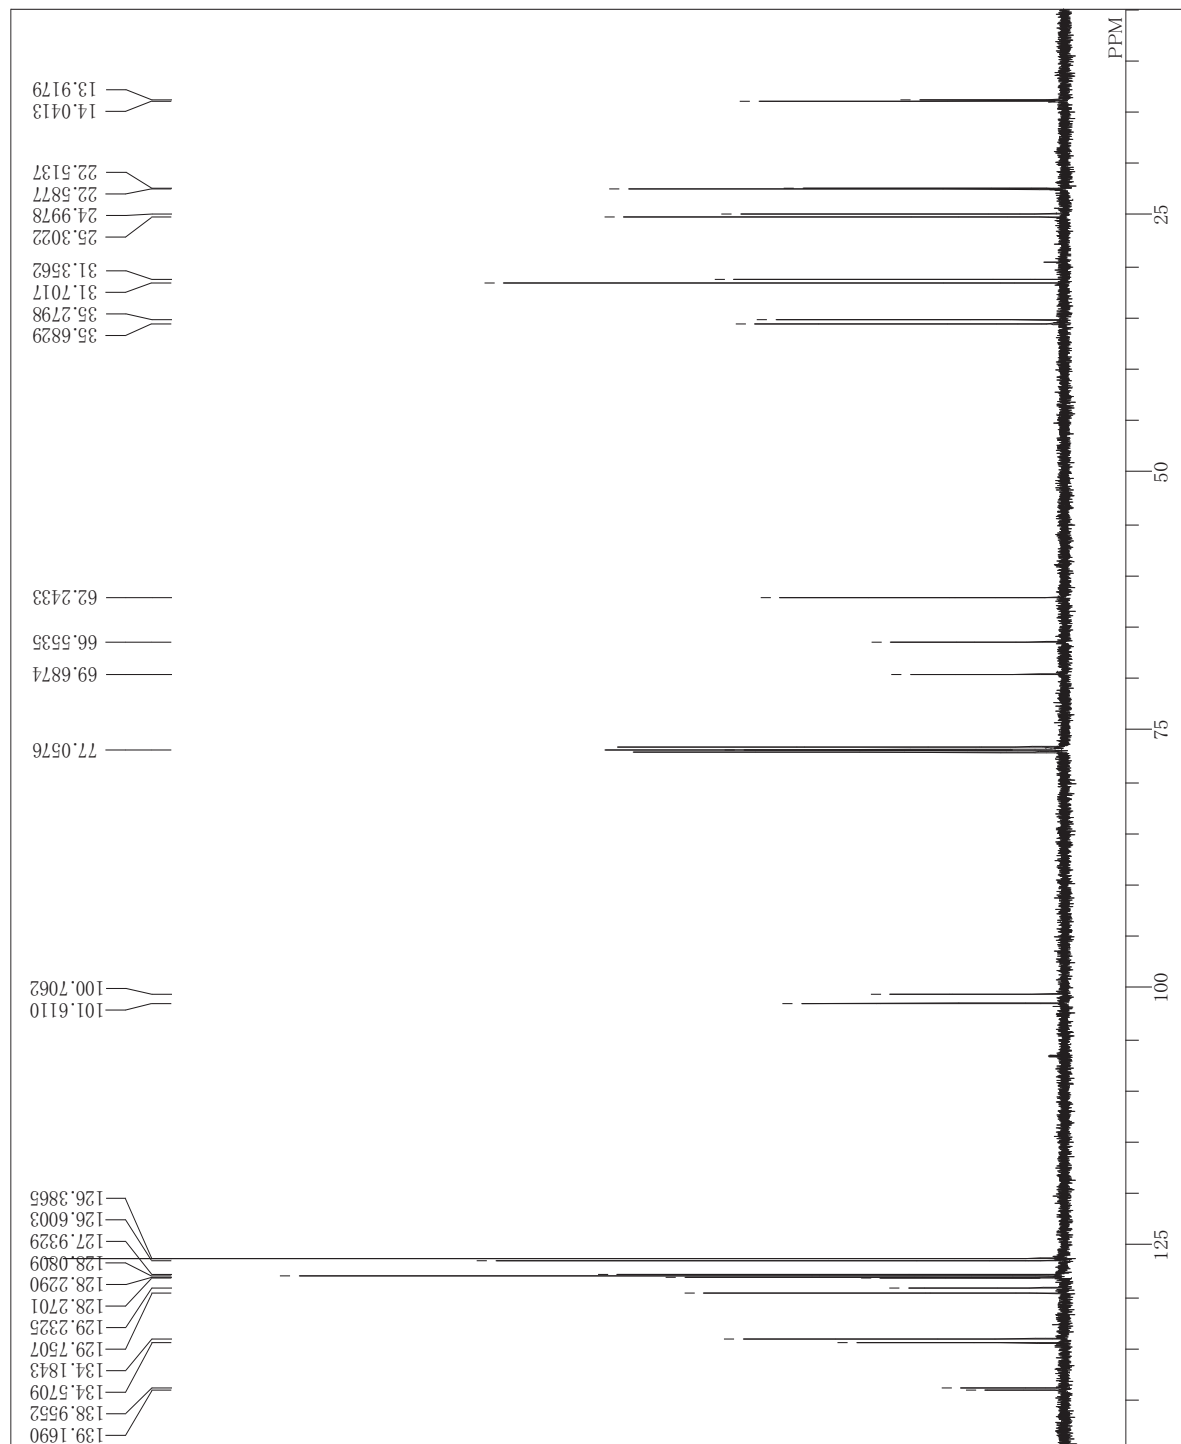

D:\NMR\1-1-15\121215\kubo\kubo O.L.,2011.3.1:  
1288 13C 500 CDC13  
Wed Jan 12 17:49:17 2011  
13C  
bcm  
EXMOD 125.65 MHz  
OBFRQ 0.00 KHz  
OBSET 127958.00 Hz  
OBFIN 32768  
POINT 33898.30 Hz  
FREQU 498  
SCANS 0.9667 sec  
ACQTM 2.0333 sec  
PD 4.60 usec  
PW1 25.9 c  
IRNUC CDCL3  
CTEMP 77.00 ppm  
SLVNT BF  
EXREF 0.12 Hz  
RGAIN 26

D:\NMR\1-1-15\121215\kubo\kubo O.L.,2011.3.1:  
1288 13C 500 CDC13  
Wed Jan 12 17:49:17 2011  
13C  
bcm  
EXMOD 125.65 MHz  
OBFRQ 0.00 KHz  
OBSET 127958.00 Hz  
OBFIN 32768  
POINT 33898.30 Hz  
FREQU 498  
SCANS 0.9667 sec  
ACQTM 2.0333 sec  
PD 4.60 usec  
PW1 25.9 c  
IRNUC CDCL3  
CTEMP 77.00 ppm  
SLVNT BF  
EXREF 0.12 Hz  
RGAIN 26

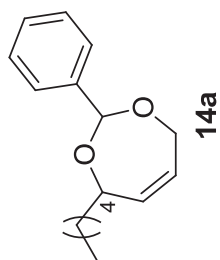





### $^{13}\text{C}$ NMR of **14b**

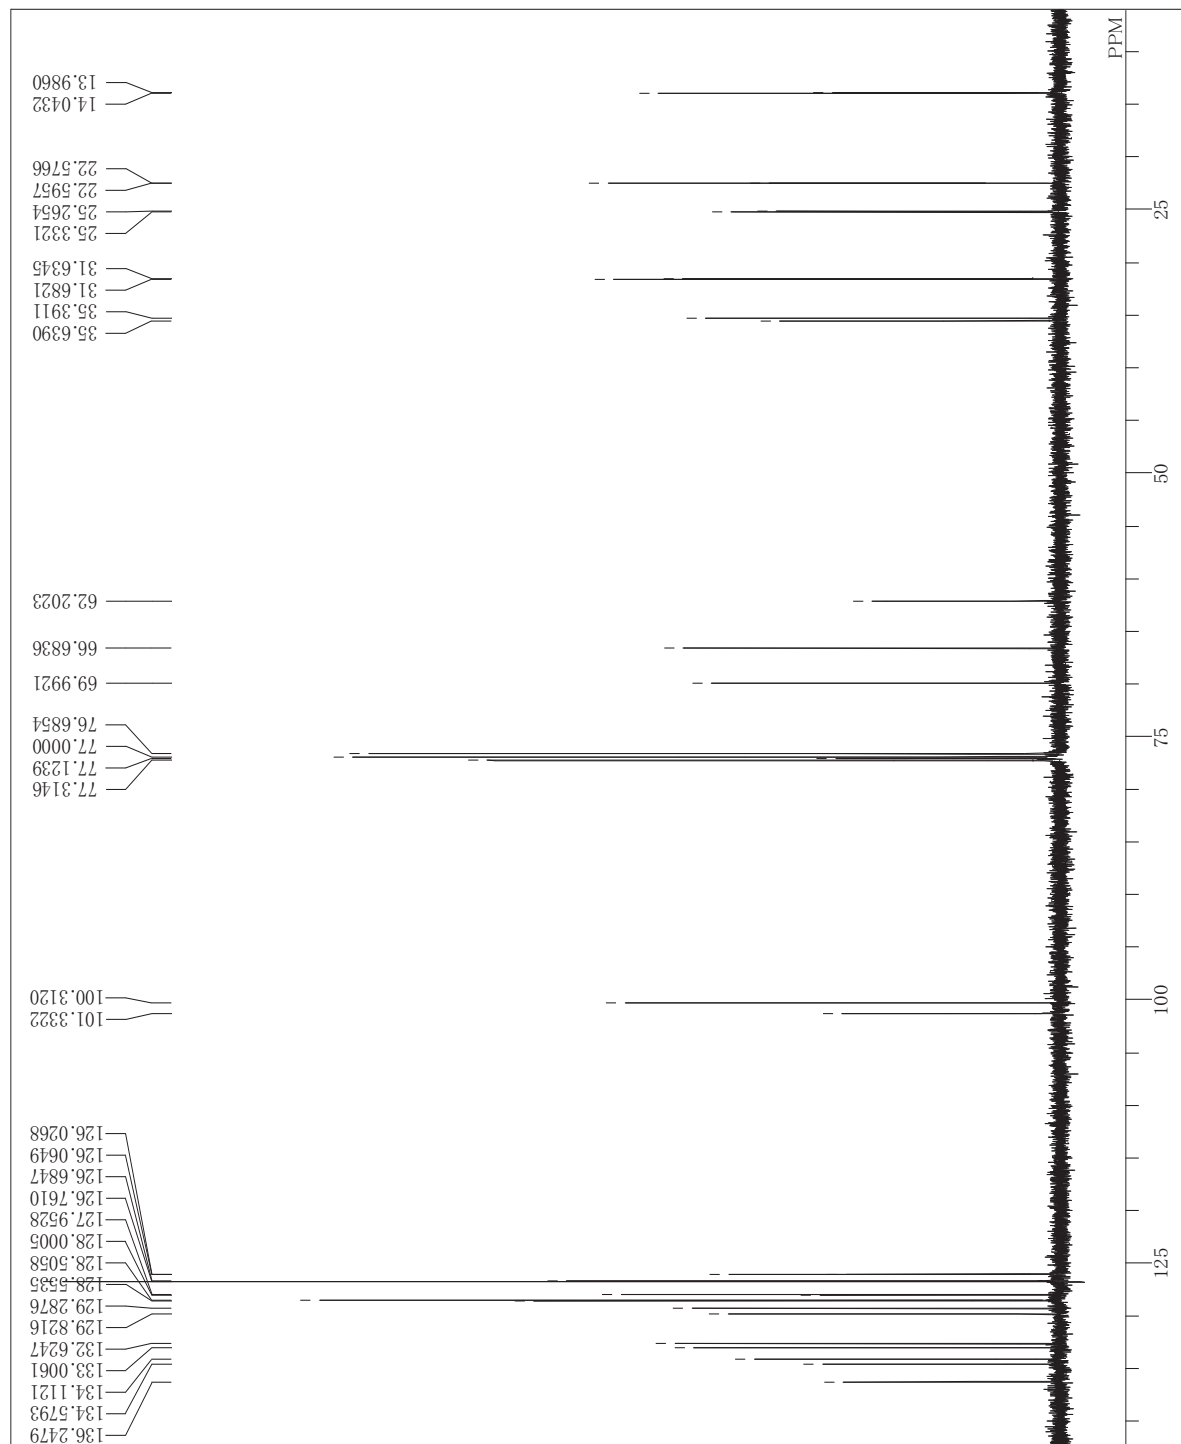

D:FILE  
COMINT  
D:ATM  
OBNUC  
EXMOD  
OBFREQ  
OBSETE  
OBFIN  
POINT  
FREQU  
SCANS  
ACQTM  
PD  
PWI  
IRNUC  
C:TEMP  
SLVNT  
EXREF  
BF  
RGAIN

D:\NMR\1-10-2011\14b\14b01\14b01.3.1:  
single pulse decoupled gated NOE  
08-09-2010 16:42:38  
13C

single\_pulse\_dec  
100.53 MHz  
5.35 KHz  
5.86 Hz  
2621.4  
25125.24 Hz  
1.0433 sec  
2.0000 sec  
3.17 usec  
1H  
23.8 c  
CDCL3  
77.00 ppm  
0.12 Hz  
60

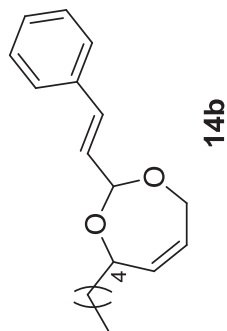

<sup>1</sup>H NMR of 5a

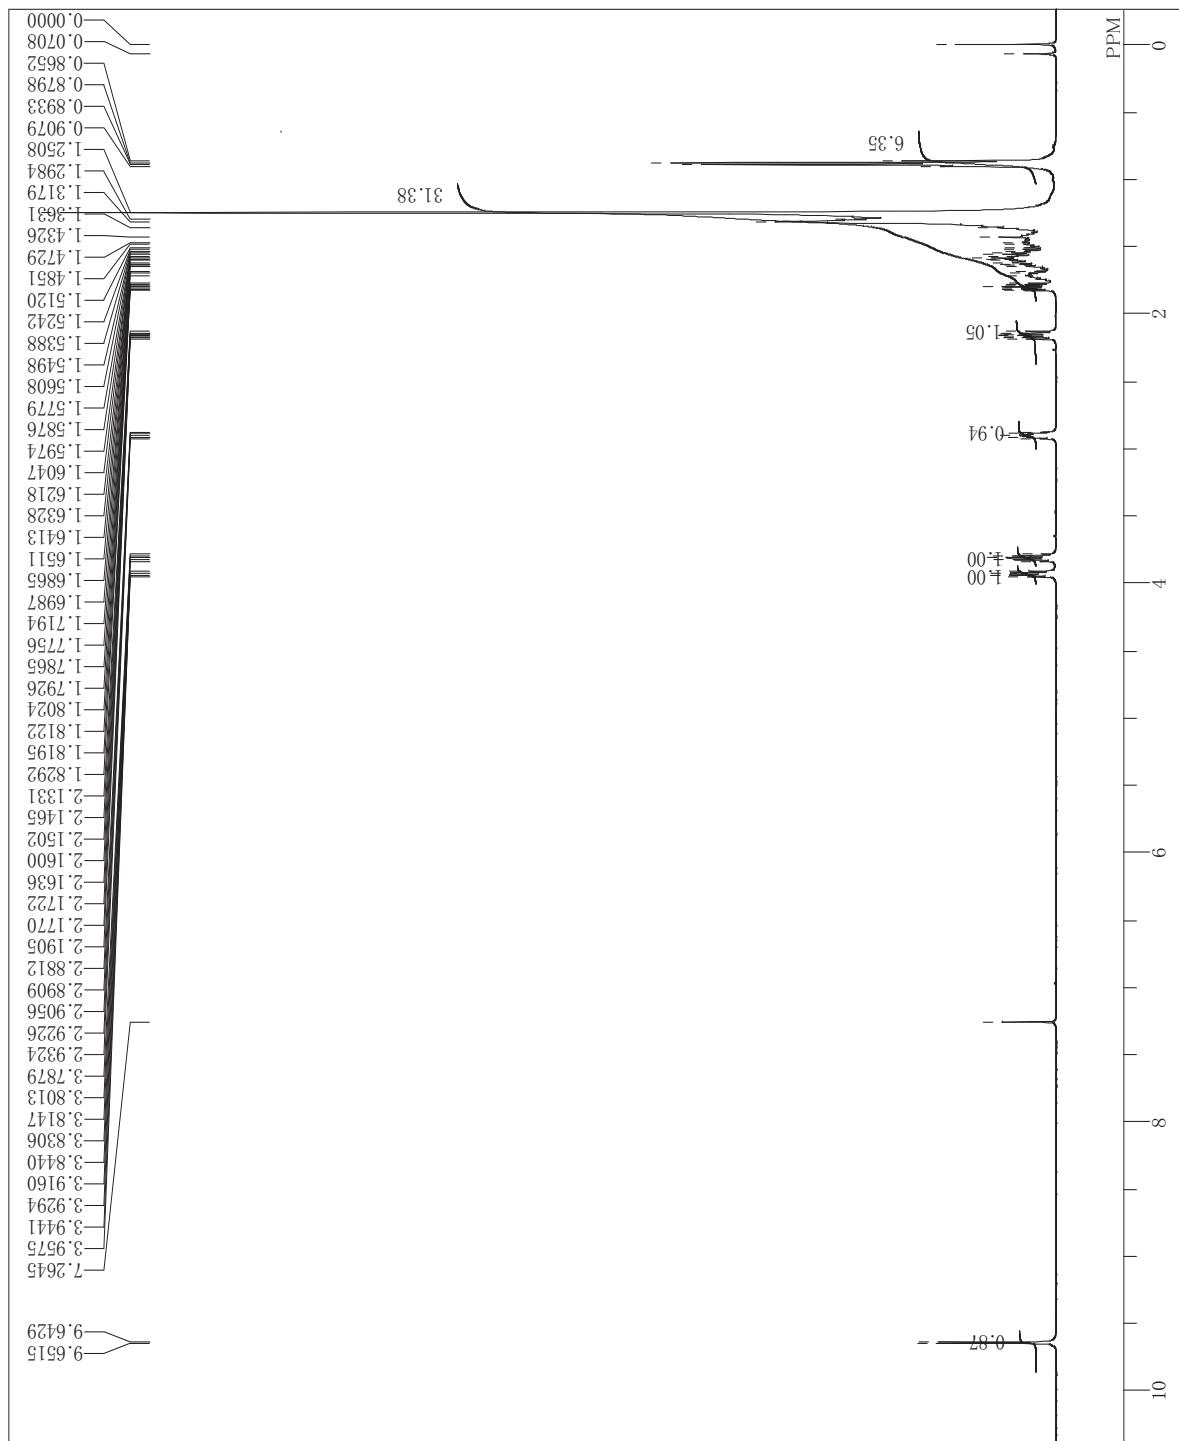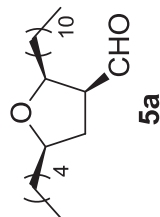

<sup>13</sup>C NMR of 5a

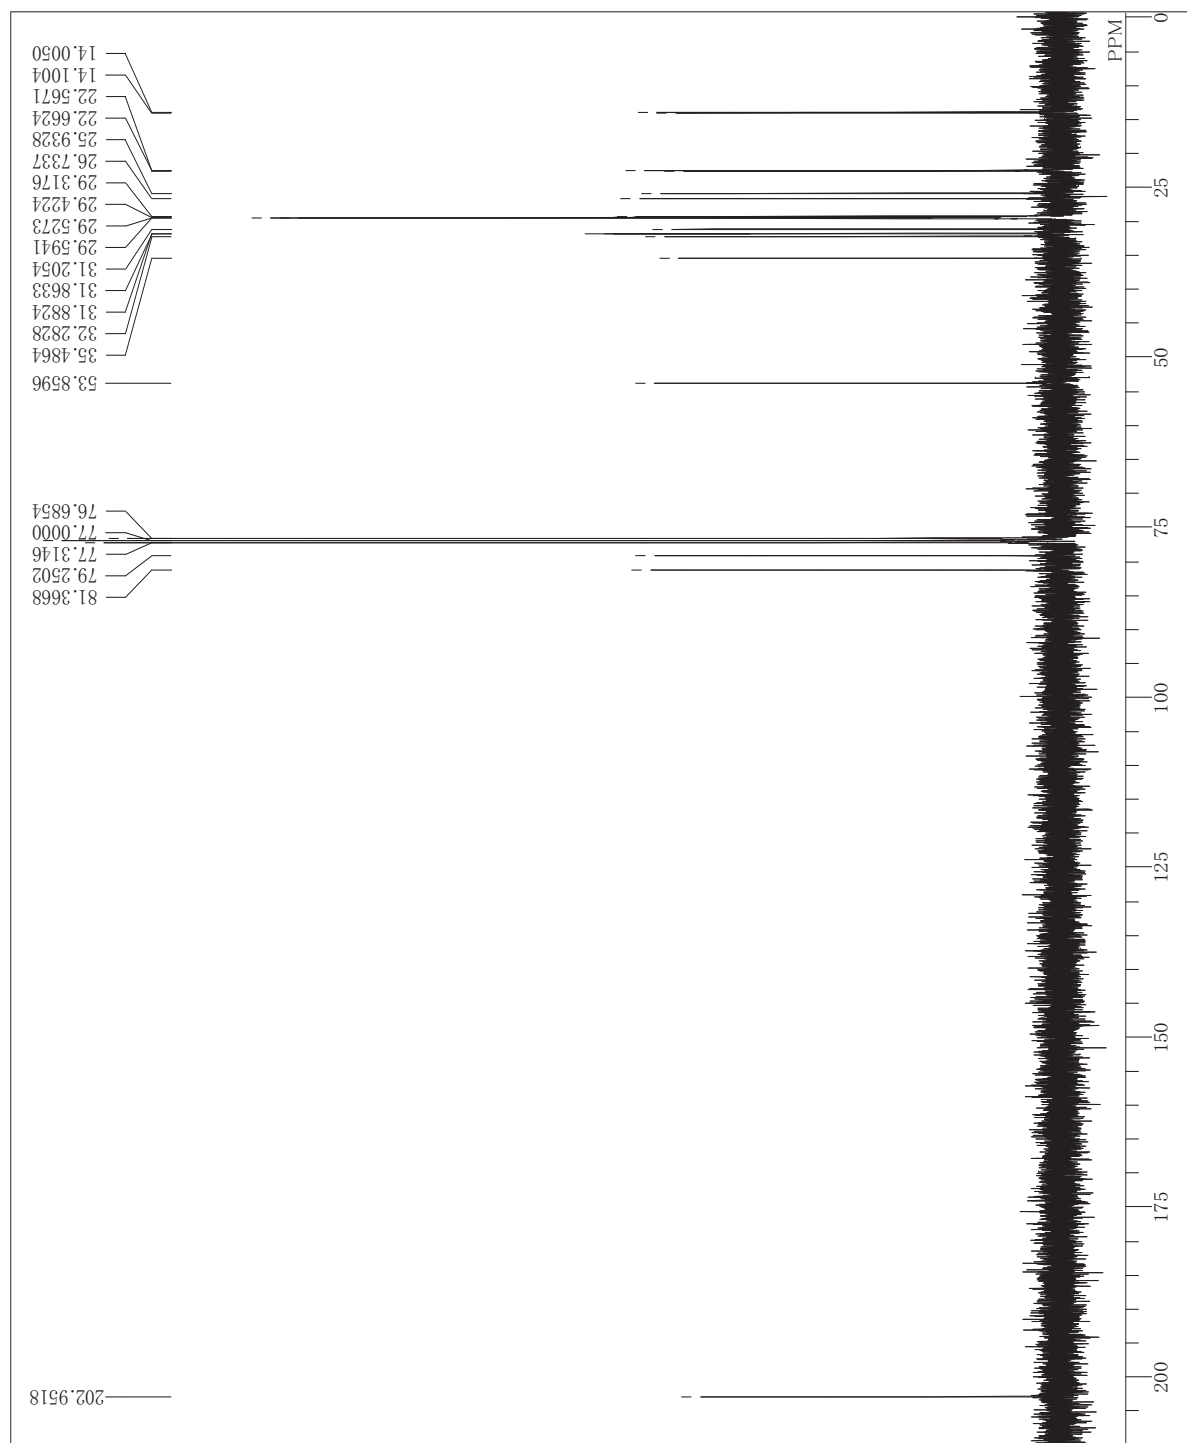

D:FNMR  
COMINT  
D:ATM  
O:NUC  
EXMOD  
O:BFKQ  
O:BSST  
O:BFIN  
POINT  
FREQU  
SC/ANS  
ACQTM  
PD  
PWI  
IRNUC  
C:TEMP  
SLVNT  
EXREF  
BF  
RGAIN

single.pulse\_dec  
100.53 MHz  
5.35 KHz  
5.86 Hz  
32768  
31407.03 Hz  
416  
1.0433 sec  
2.0000 sec  
3.17 usec

1H 22.3 c  
CDCL3  
77.00 ppm  
0.32 Hz  
30

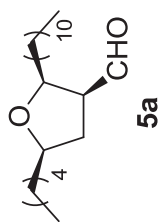





### <sup>13</sup>C NMR of 5bA

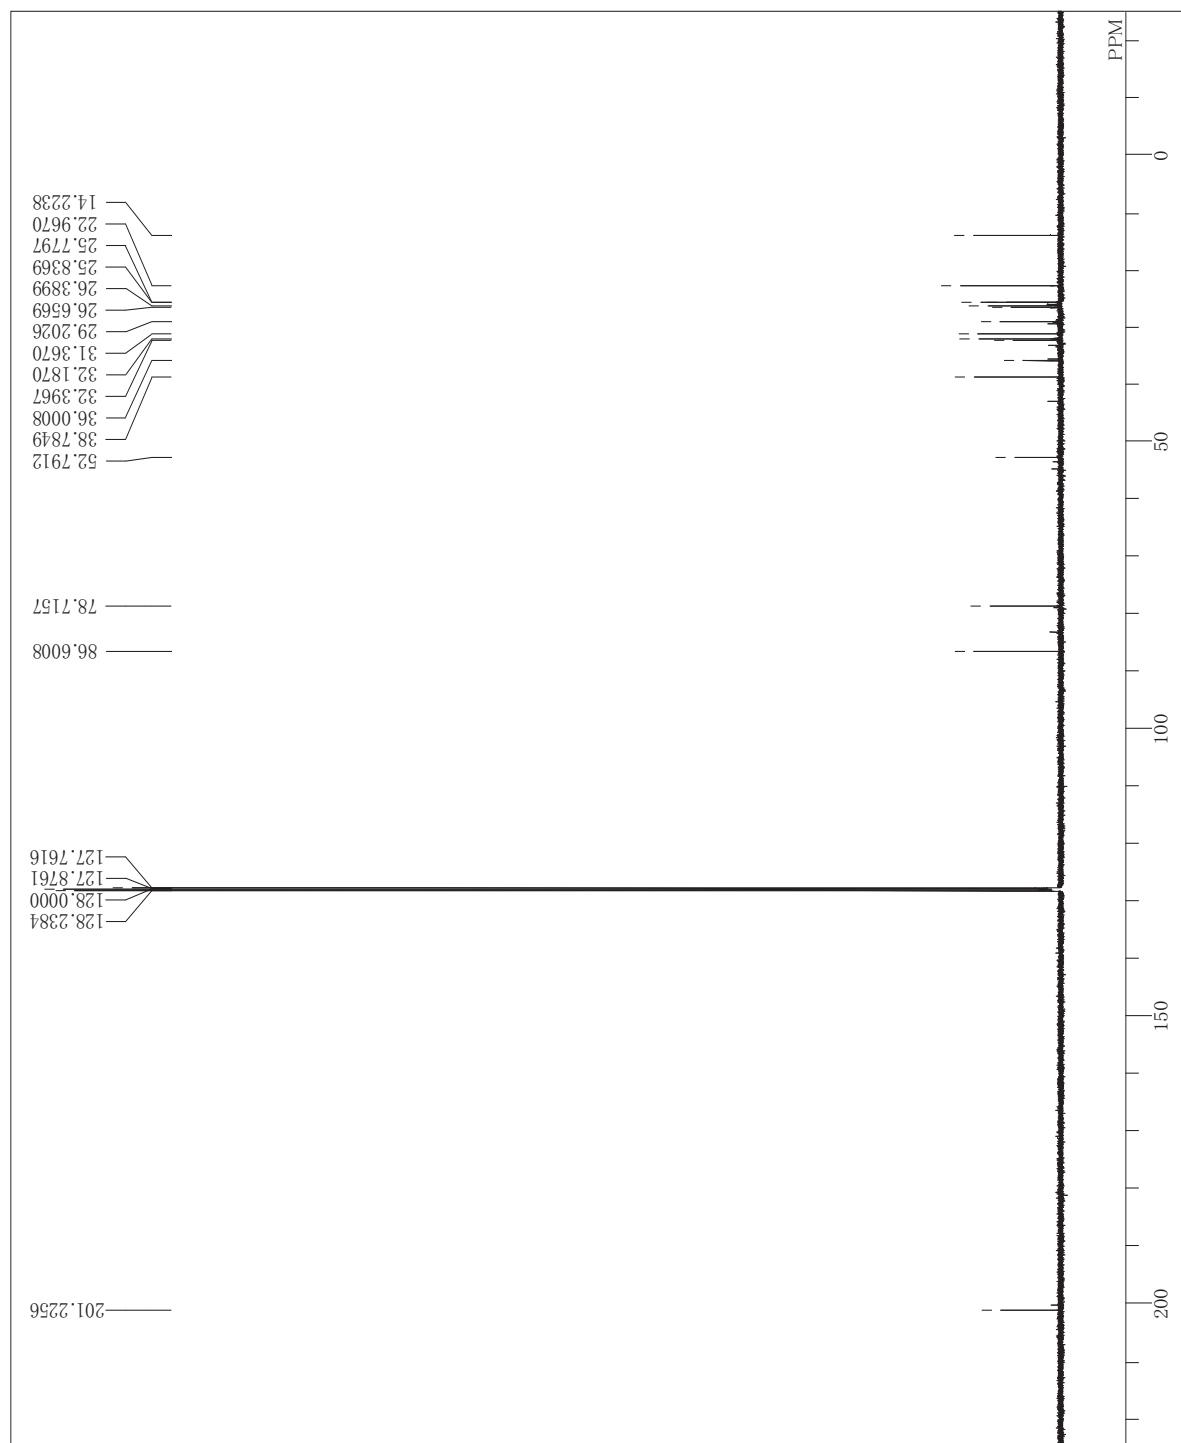

D:FNMR1  
COMINT  
D:ATM  
OBNUC  
EXMOD  
OBF1RQ  
OBS1E  
OBF1N  
POINT  
FREQU  
SCANS  
ACQTM  
PD  
PW1  
IRNUC  
C:TEMP  
SLANT  
EXREF  
BF  
RGAIN

single\_pulse\_dec  
11-08-2010 00:11:14  
13C

100.53 MHz  
5.35 KHz  
5.86 Hz  
2621.4  
25125.24 Hz  
302  
1.0433 sec  
2.0000 sec  
3.17 usec  
IH 23.8 c  
C6D6  
128.00 ppm  
0.12 Hz  
60

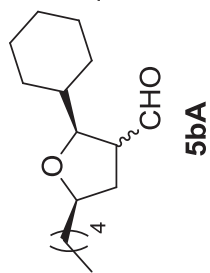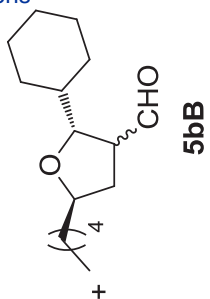







<sup>1</sup>H NMR of 5dA and 5dB

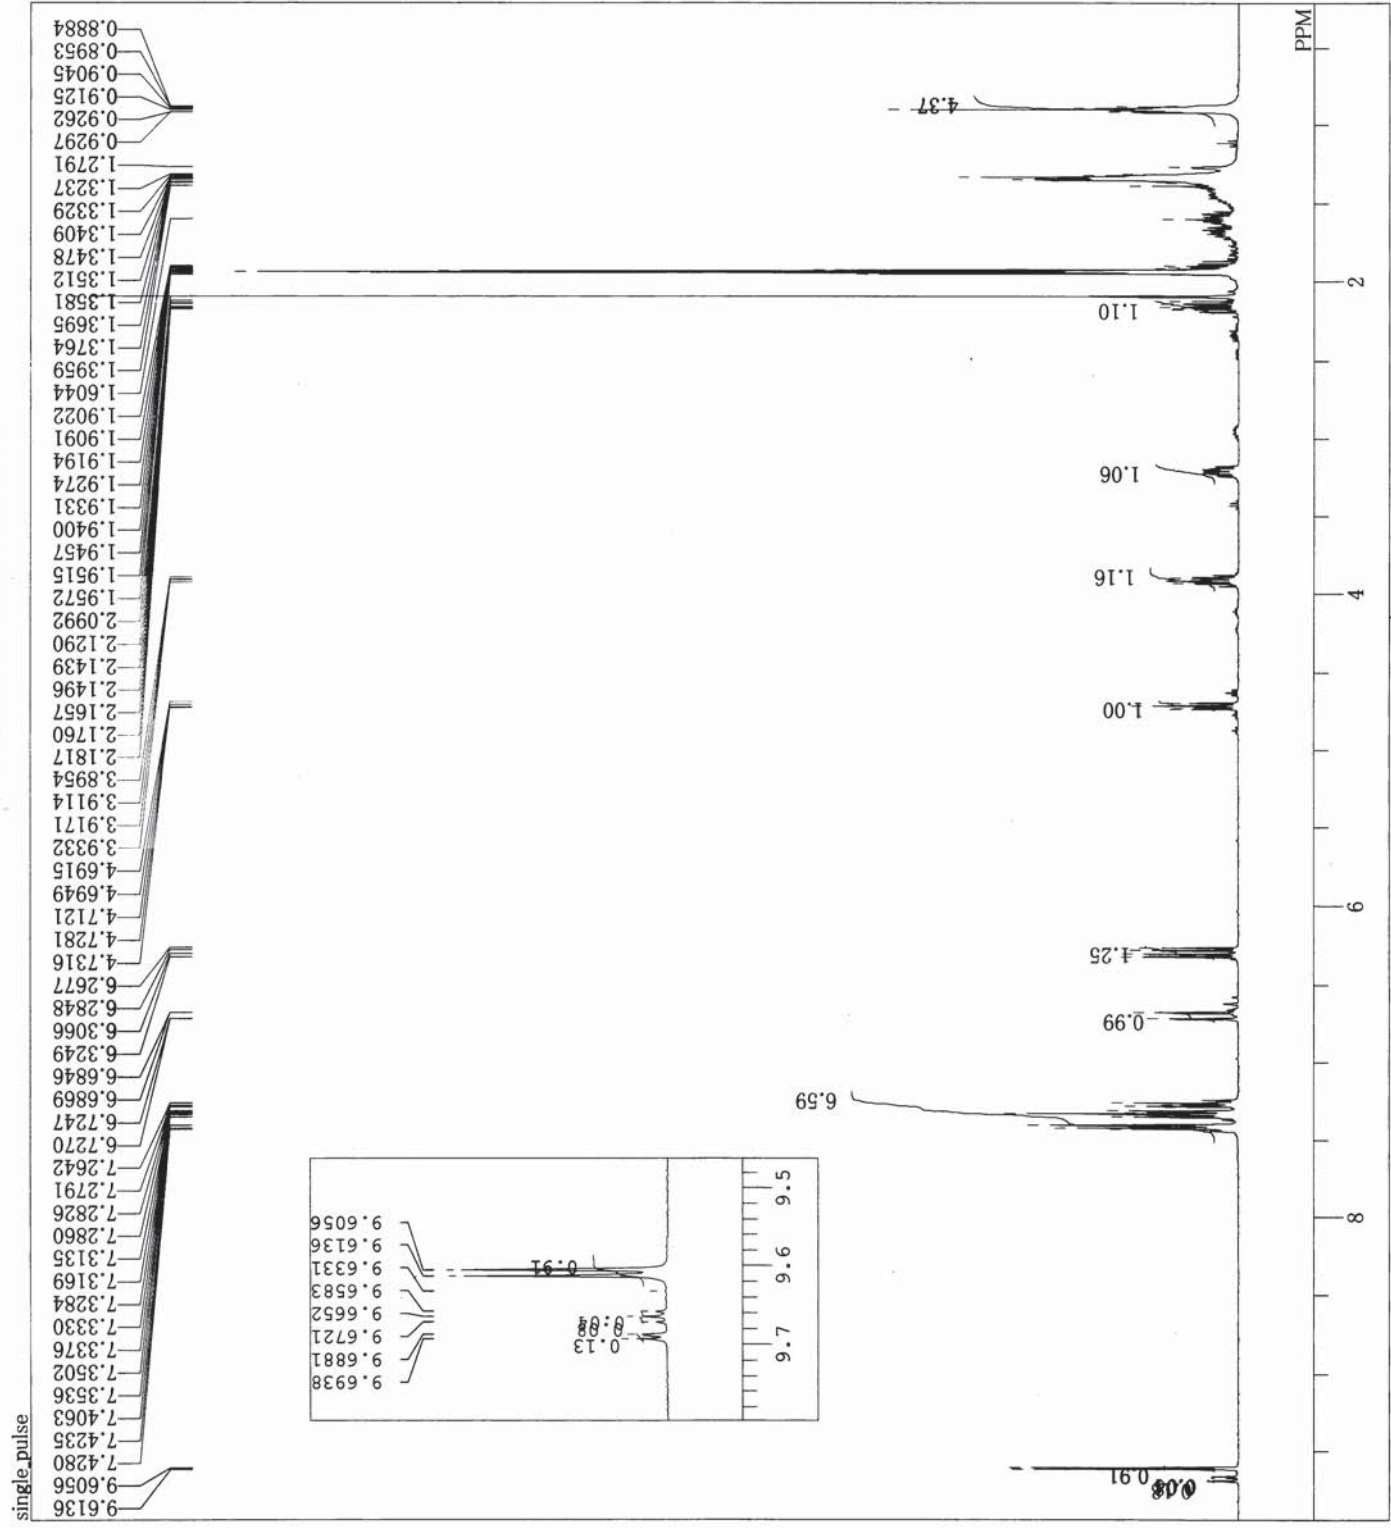

DFILE  
 COMNT  
 DATIM 21-09-2010 16:35:04  
 OBNUC 1H  
 EXMOD single\_pulse.ex2  
 OBFRQ 399.78 MHz  
 OBSST 4.19 KHz  
 OBFIN 7.29 Hz  
 POINT 13107  
 FREQU 6002.31 Hz  
 SCANS 16  
 ACQTM  
 PD 2.1837 sec  
 5.0000 sec  
 5.35 usec  
 IRNUC 1H  
 35.0 c  
 CD3CN  
 SLVNT 1.94 ppm  
 EXREF 0.12 Hz  
 BF 44  
 RGAIN

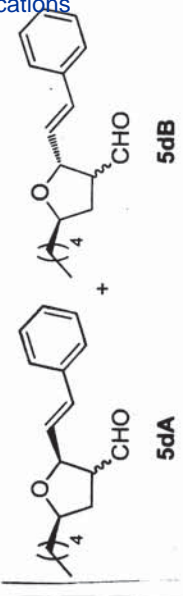

<sup>13</sup>C NMR of 5dA and 5dB

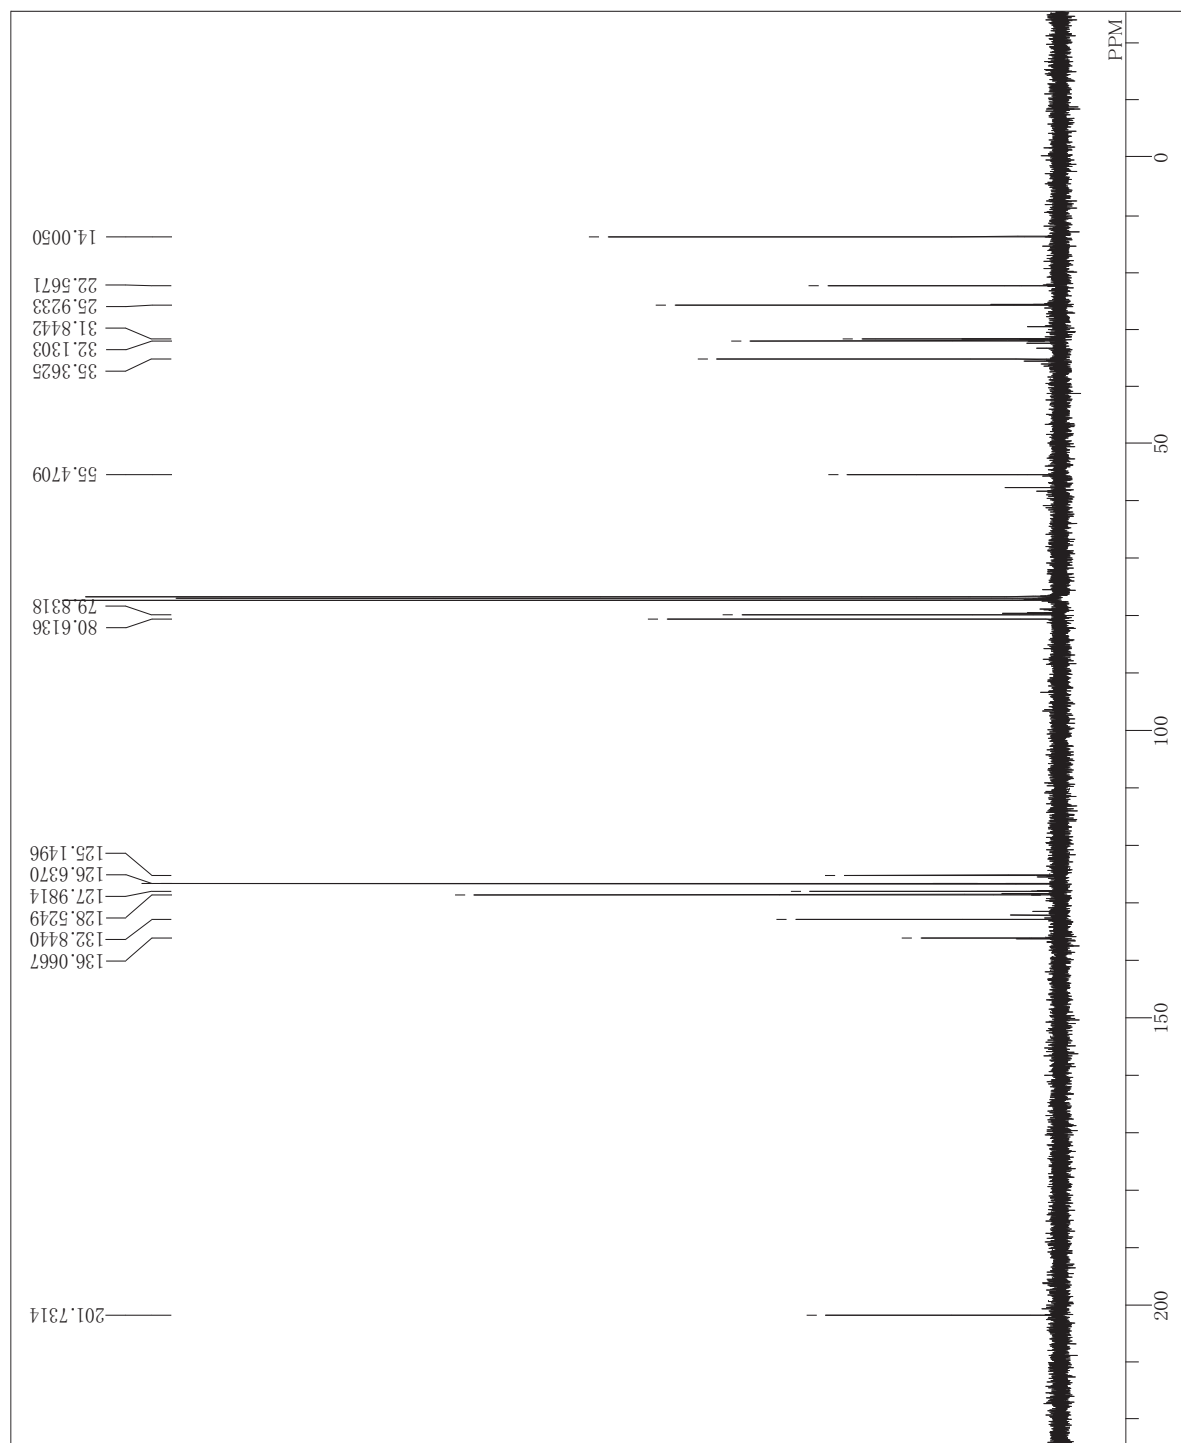

D:FNMR  
 single pulse decoupled gated NOE  
 13C  
 single\_pulse\_dec  
 100.53 MHz  
 5.35 KHz  
 5.86 Hz  
 2621.4  
 25125.24 Hz  
 422  
 1.0433 sec  
 2.0000 sec  
 3.17 usec  
 1H 24.0 c  
 CDCL3  
 77.00 ppm  
 0.12 Hz  
 60

D:\FNMR\1-10-2010\13C\13C\2621.4  
 21-09-2010 22:37:33

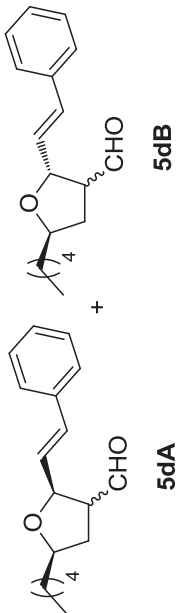

<sup>1</sup>H NMR of 5eA and 5eB

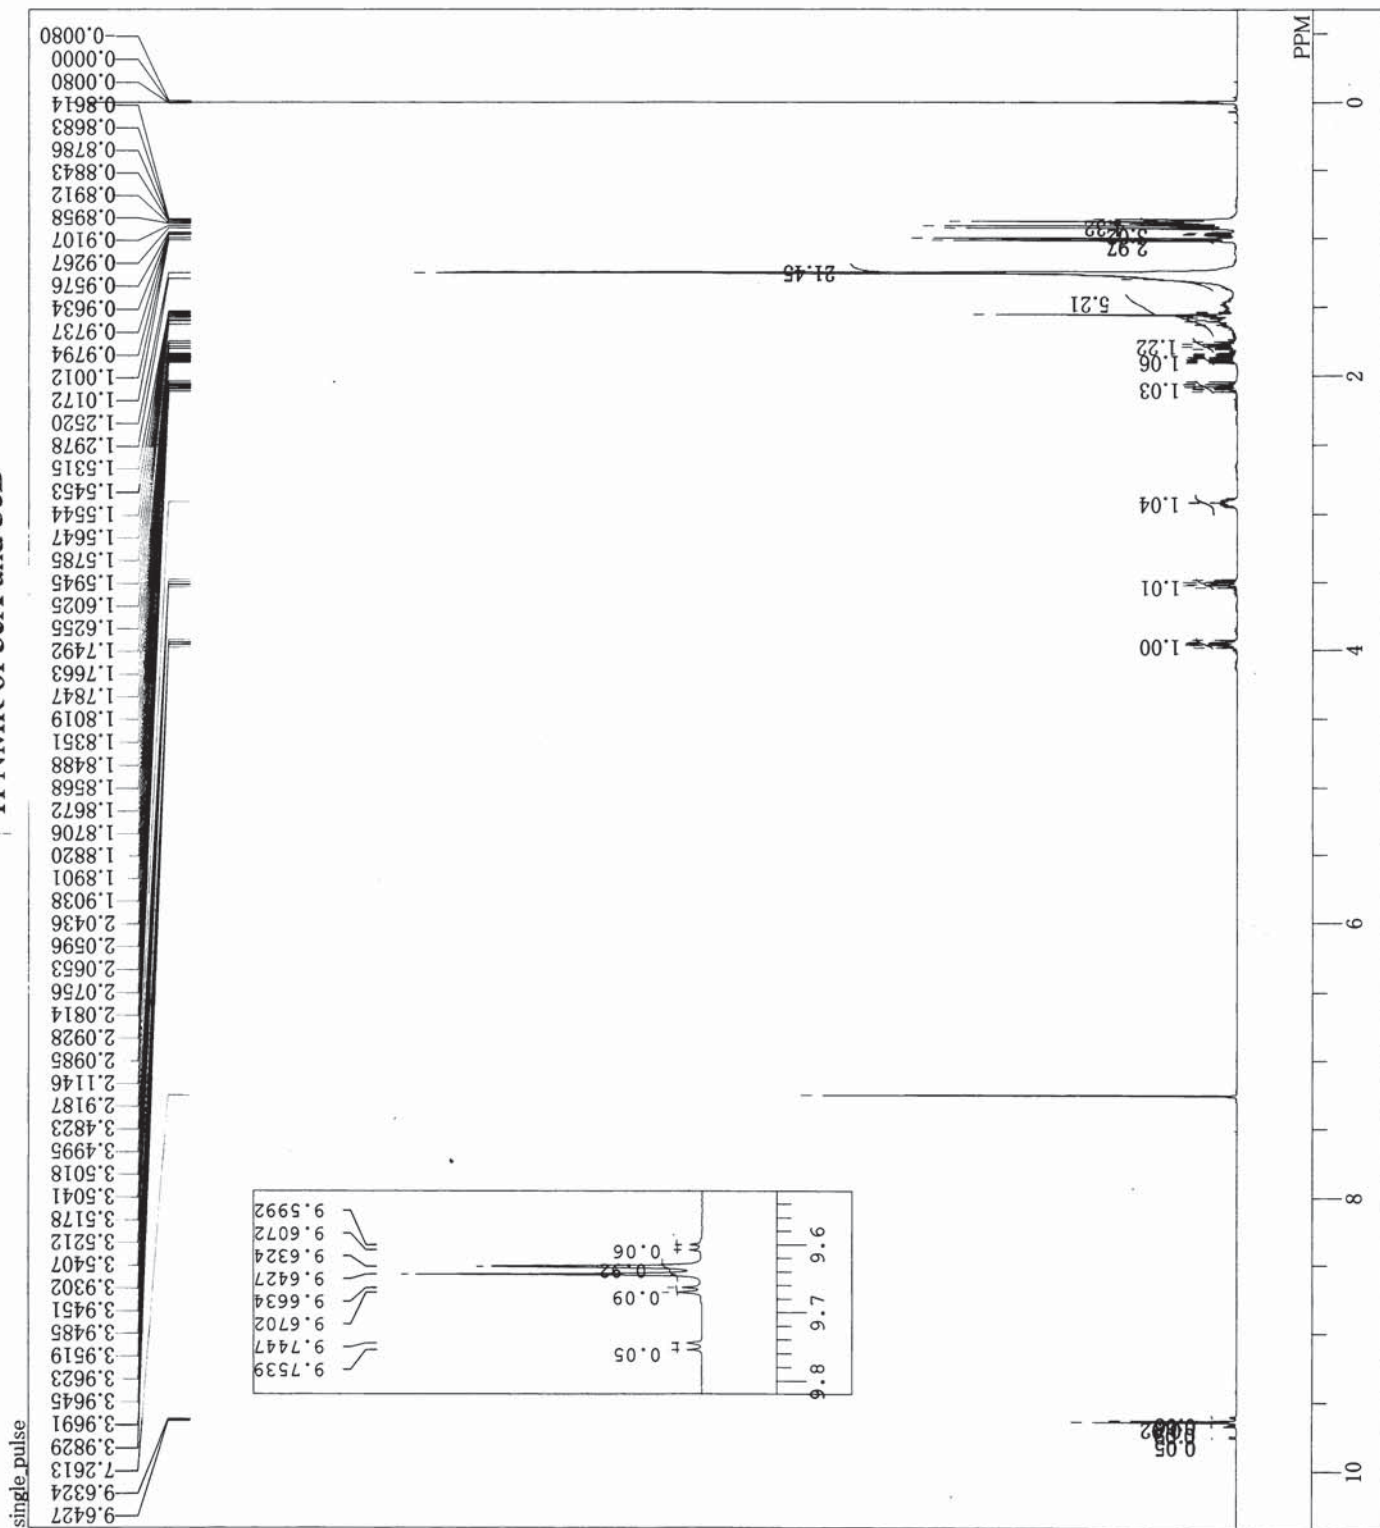

DFILE  
 COMINT  
 DATIM  
 OBNUC  
 EXMOD  
 OBFRQ  
 OBSST  
 OBFIN  
 POINT  
 FREQU  
 SCANS  
 ACQTM  
 PD  
 PW1  
 IRNUC  
 CTEMP  
 SLVNT  
 EXREF  
 BF  
 RGAIN

D:\NMRデータ保存用\kubo\kubo NMR\Orga  
 single\_pulse  
 27-08-2010 15:52:04  
 1H  
 single\_pulse.ex2  
 399.78 MHz  
 4.19 KHz  
 7.29 Hz  
 13107  
 6002.31 Hz  
 16  
 2.1837 sec  
 5.0000 sec  
 5.35 usec  
 1H  
 23.8 c  
 CDCL3  
 0.00 ppm  
 0.12 Hz  
 42

9.6427  
 9.6324  
 7.2613  
 3.9829  
 3.9691  
 3.9645  
 3.9623  
 3.9519  
 3.9485  
 3.9451  
 3.9302  
 3.5407  
 3.5212  
 3.5178  
 3.5041  
 3.5018  
 3.4995  
 3.4823  
 2.9187  
 2.1146  
 2.0985  
 2.0928  
 2.0814  
 2.0756  
 2.0653  
 2.0596  
 2.0436  
 1.9038  
 1.8901  
 1.8820  
 1.8706  
 1.8672  
 1.8568  
 1.8488  
 1.8351  
 1.8019  
 1.7847  
 1.7663  
 1.7492  
 1.6255  
 1.6025  
 1.5945  
 1.5785  
 1.5647  
 1.5544  
 1.5453  
 1.5315  
 1.2978  
 1.2520  
 1.0172  
 1.0012  
 0.9794  
 0.9737  
 0.9634  
 0.9576  
 0.9267  
 0.9107  
 0.8958  
 0.8912  
 0.8843  
 0.8786  
 0.8683  
 0.8614  
 0.0080  
 0.0080  
 0.0080

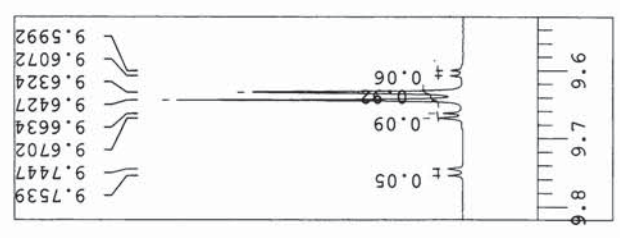

10  
 9.6427  
 9.6324  
 7.2613  
 3.9829  
 3.9691  
 3.9645  
 3.9623  
 3.9519  
 3.9485  
 3.9451  
 3.9302  
 3.5407  
 3.5212  
 3.5178  
 3.5041  
 3.5018  
 3.4995  
 3.4823  
 2.9187  
 2.1146  
 2.0985  
 2.0928  
 2.0814  
 2.0756  
 2.0653  
 2.0596  
 2.0436  
 1.9038  
 1.8901  
 1.8820  
 1.8706  
 1.8672  
 1.8568  
 1.8488  
 1.8351  
 1.8019  
 1.7847  
 1.7663  
 1.7492  
 1.6255  
 1.6025  
 1.5945  
 1.5785  
 1.5647  
 1.5544  
 1.5453  
 1.5315  
 1.2978  
 1.2520  
 1.0172  
 1.0012  
 0.9794  
 0.9737  
 0.9634  
 0.9576  
 0.9267  
 0.9107  
 0.8958  
 0.8912  
 0.8843  
 0.8786  
 0.8683  
 0.8614  
 0.0080  
 0.0080  
 0.0080  
 PPM



<sup>1</sup>H NMR of 5fA and 5fB

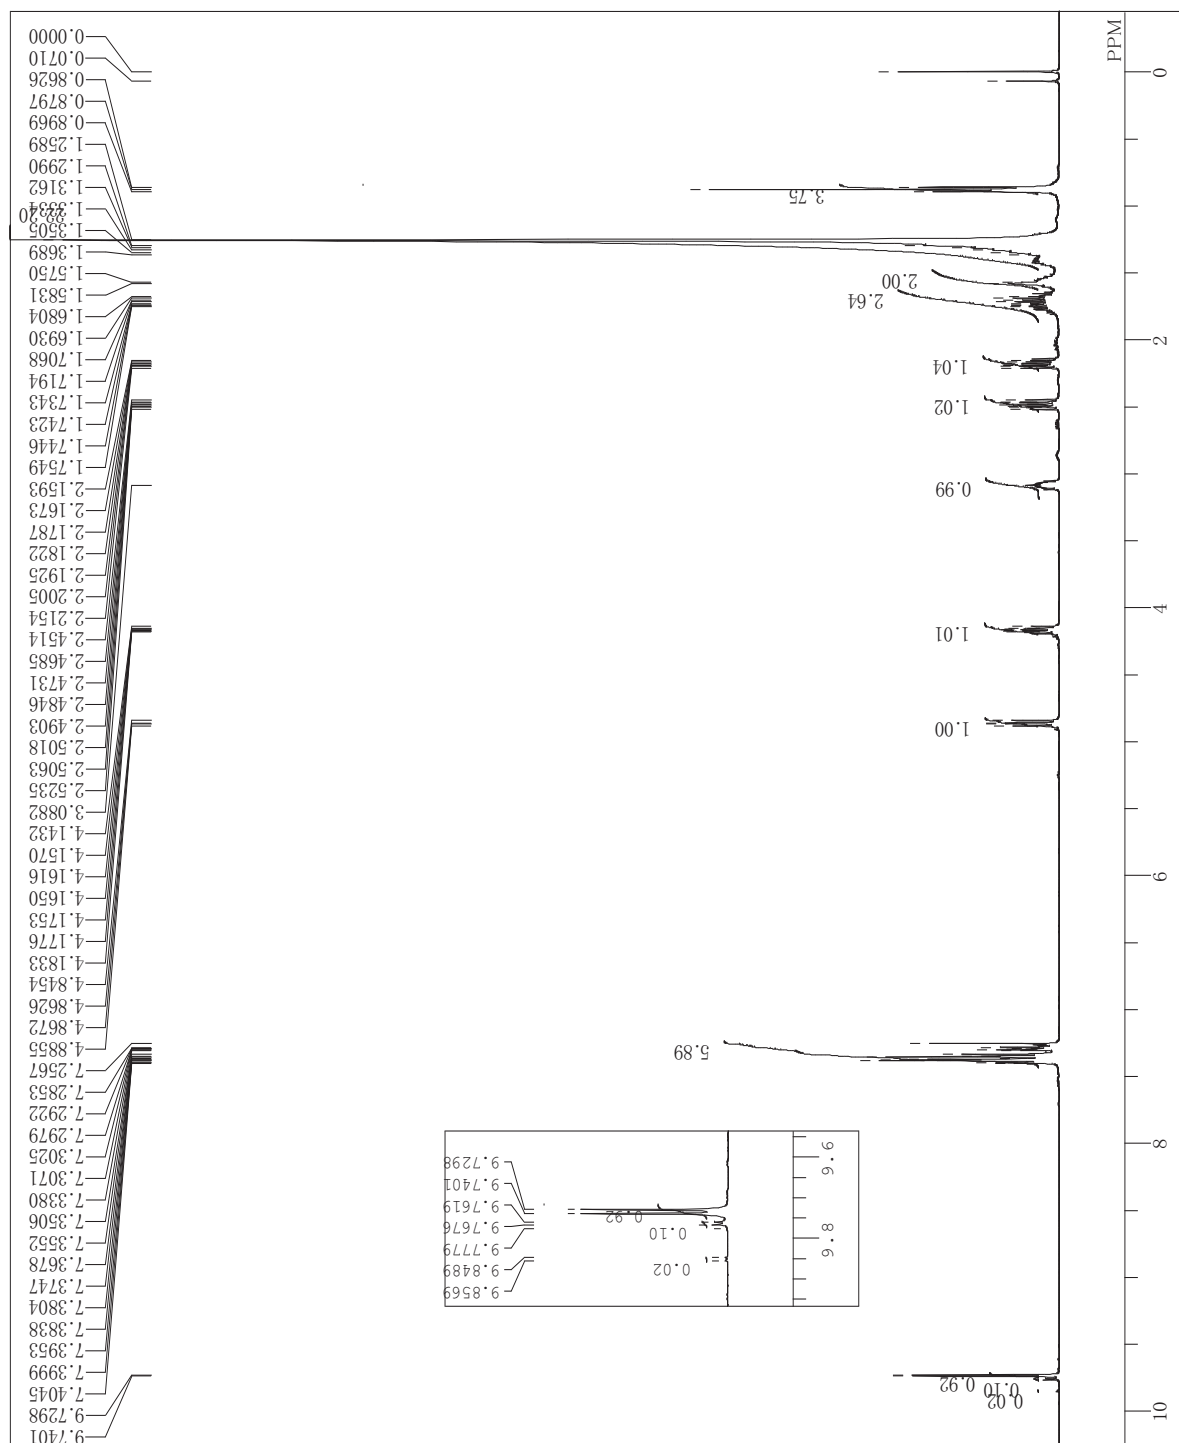

DFILE  
 COMINT  
 DATIM 04-09-2010 16:40:27  
 IH  
 single\_pulse.ex2  
 399.78 MHz  
 4.19 KHz  
 7.29 Hz  
 13107  
 6002.31 Hz  
 8  
 2.1837 sec  
 5.0000 sec  
 5.35 usec  
 IH 24.1 c  
 CDCL3  
 0.00 ppm  
 0.12 Hz  
 30  
 RGAIN

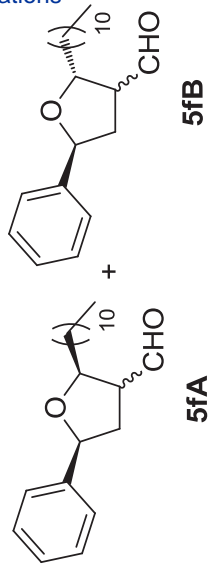







# <sup>13</sup>C NMR of 7

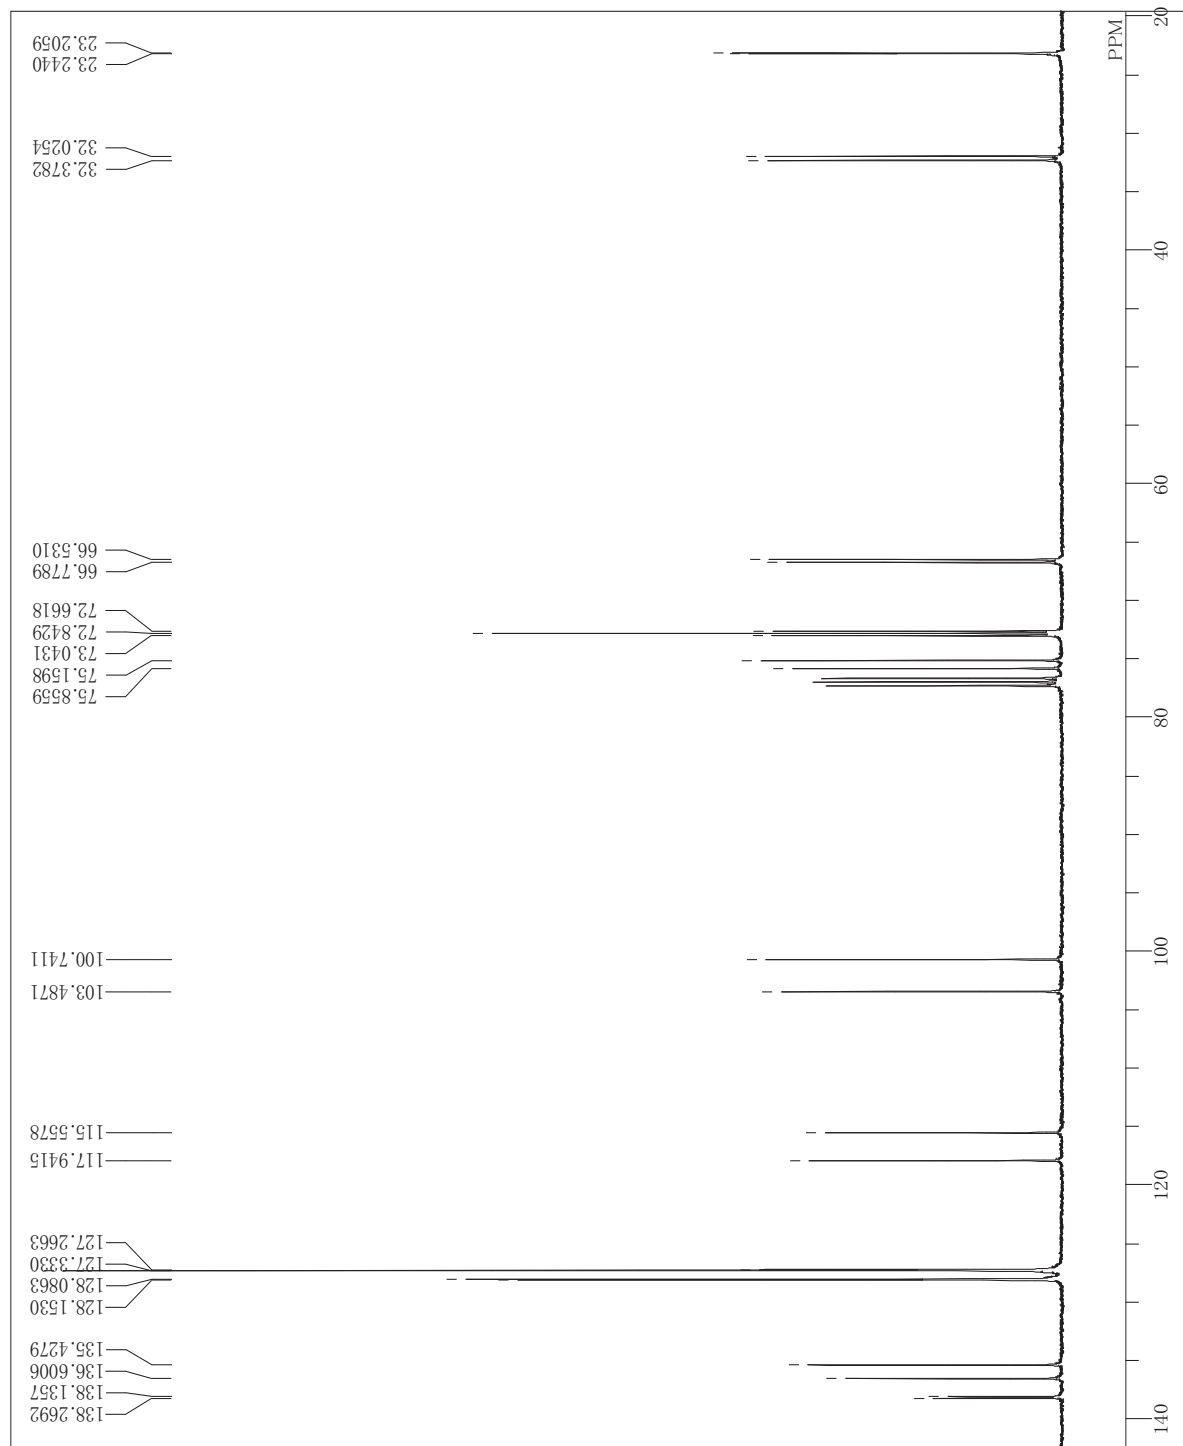

D:FNMR1\1-12-2011\11kubo\kubo D 3 1 2 2 2 2  
single pulse decoupled gated NOE  
03-01-2011 20:31:30  
13C  
single\_pulse\_dec  
100.53 MHz  
5.35 KHz  
5.86 Hz  
32768  
31407.04 Hz  
470  
1.0433 sec  
2.0000 sec  
3.17 usec  
IH 21.5 c  
CDCL3  
77.00 ppm  
0.12 Hz  
60

D:FNMR1\1-12-2011\11kubo\kubo D 3 1 2 2 2 2  
single pulse decoupled gated NOE  
03-01-2011 20:31:30  
13C  
single\_pulse\_dec  
100.53 MHz  
5.35 KHz  
5.86 Hz  
32768  
31407.04 Hz  
470  
1.0433 sec  
2.0000 sec  
3.17 usec  
IH 21.5 c  
CDCL3  
77.00 ppm  
0.12 Hz  
60

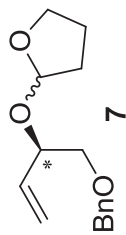



# <sup>13</sup>C NMR of 8

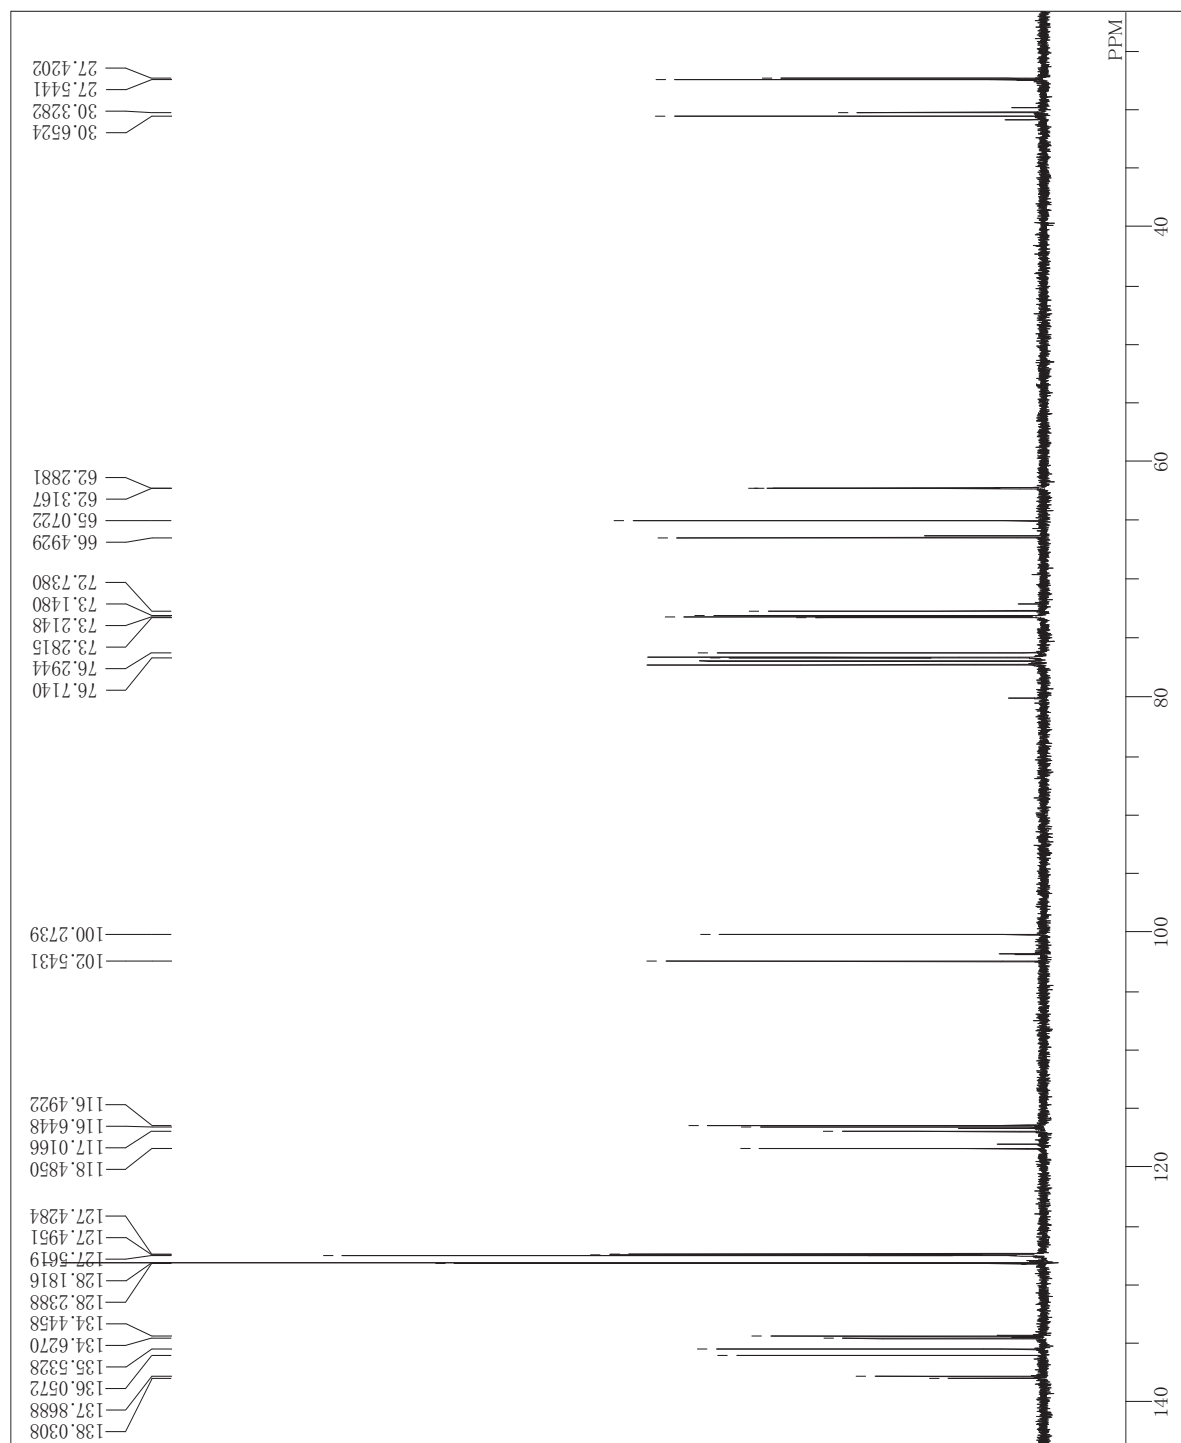

D:FNMR1-1-2011-01-20 20:43:49  
single pulse decoupled gated NOE  
13C  
single\_pulse\_dec  
100.53 MHz  
5.35 KHz  
5.86 Hz  
2621.4  
25125.24 Hz  
143  
1.0433 sec  
2.0000 sec  
3.17 usec  
1H 21.5 c  
CDCL3  
77.00 ppm  
0.12 Hz  
60

D:\FNMR\1-1-2011-01-20 20:43:49  
single pulse decoupled gated NOE  
13C  
single\_pulse\_dec  
100.53 MHz  
5.35 KHz  
5.86 Hz  
2621.4  
25125.24 Hz  
143  
1.0433 sec  
2.0000 sec  
3.17 usec  
1H 21.5 c  
CDCL3  
77.00 ppm  
0.12 Hz  
60

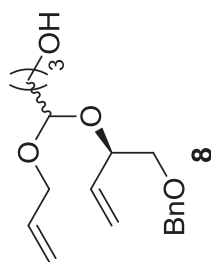



### <sup>13</sup>C NMR of 9

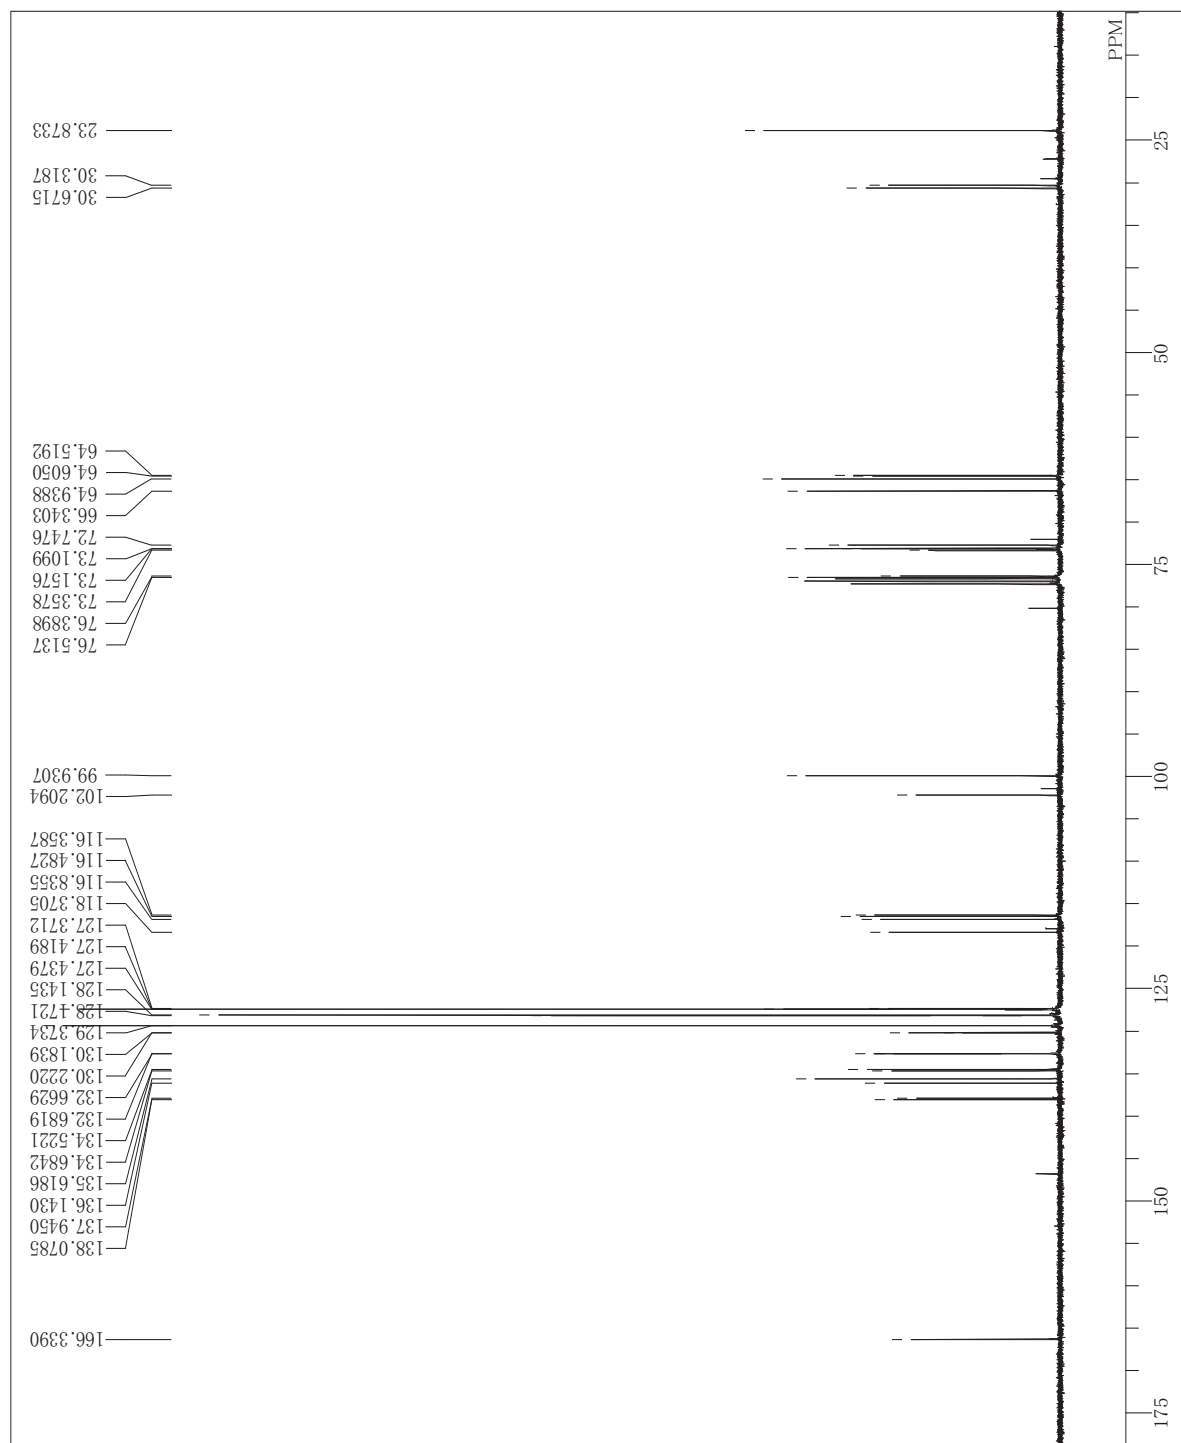

D:FNMR1-1-1 20110303 256  
single pulse decoupled gated NOE  
03-01-2011 22:39:56  
13C  
single\_pulse\_dec  
100.53 MHz  
5.35 KHz  
5.86 Hz  
2621.4  
25125.24 Hz  
313  
1.0433 sec  
2.0000 sec  
3.17 usec  
1H 21.3 c  
CDCL3  
77.00 ppm  
0.12 Hz  
60  
RGAIN

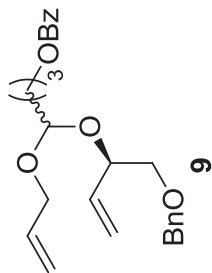



<sup>13</sup>C NMR of **10**

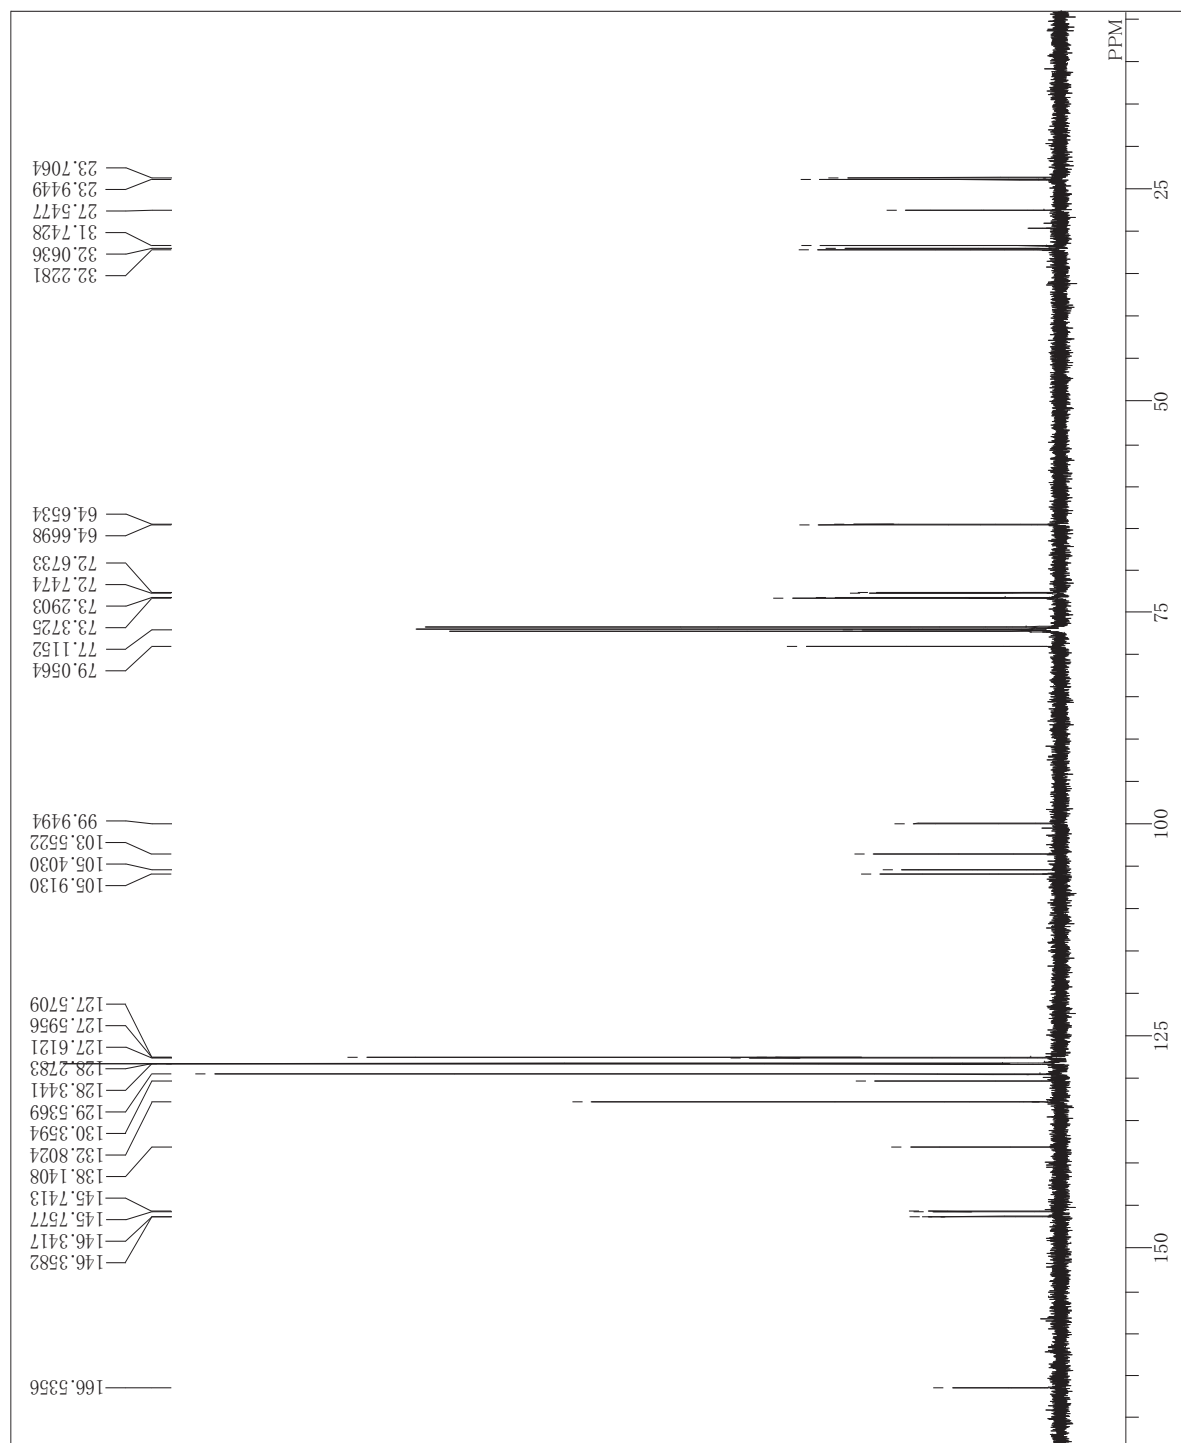

D:FNMR11-1-1 20110107 17:58:48 26  
 1272.13C 500MHz  
 Fri Jan 07 17:58:48 2011  
 13C  
 bcm  
 125.65 MHz  
 0.00 KHz  
 127958.00 Hz  
 32768  
 33898.30 Hz  
 669  
 0.9667 sec  
 2.0333 sec  
 4.60 usec  
 1H  
 465.0 c  
 CDCL3  
 77.00 ppm  
 0.12 Hz  
 26  
 RGAIN

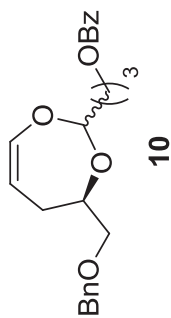

D:\NMRデータ保存用\kubo\kubo NMR\O13  
 single\_pulse  
 13-10-2010 21:40:34  
 1H  
 single\_pulse.ex2  
 399.78 MHz  
 4.19 KHz  
 7.29 Hz  
 13107  
 6002.31 Hz  
 16  
 2.1837 sec  
 5.0000 sec  
 5.35 usec  
 1H  
 23.9 c  
 CDCL3  
 0.00 ppm  
 0.12 Hz  
 44

DFILE  
 COMNT  
 DATIM  
 OBNUC  
 EXMOD  
 OBRFQ  
 OBSET  
 OBFIN  
 POINT  
 FREQU  
 SCANS  
 ACQTM  
 PD  
 PW1  
 IRNUC  
 CTEMP  
 SLVNT  
 EXREF  
 BF  
 RGAIN

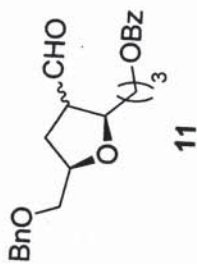

<sup>1</sup>H NMR of 11

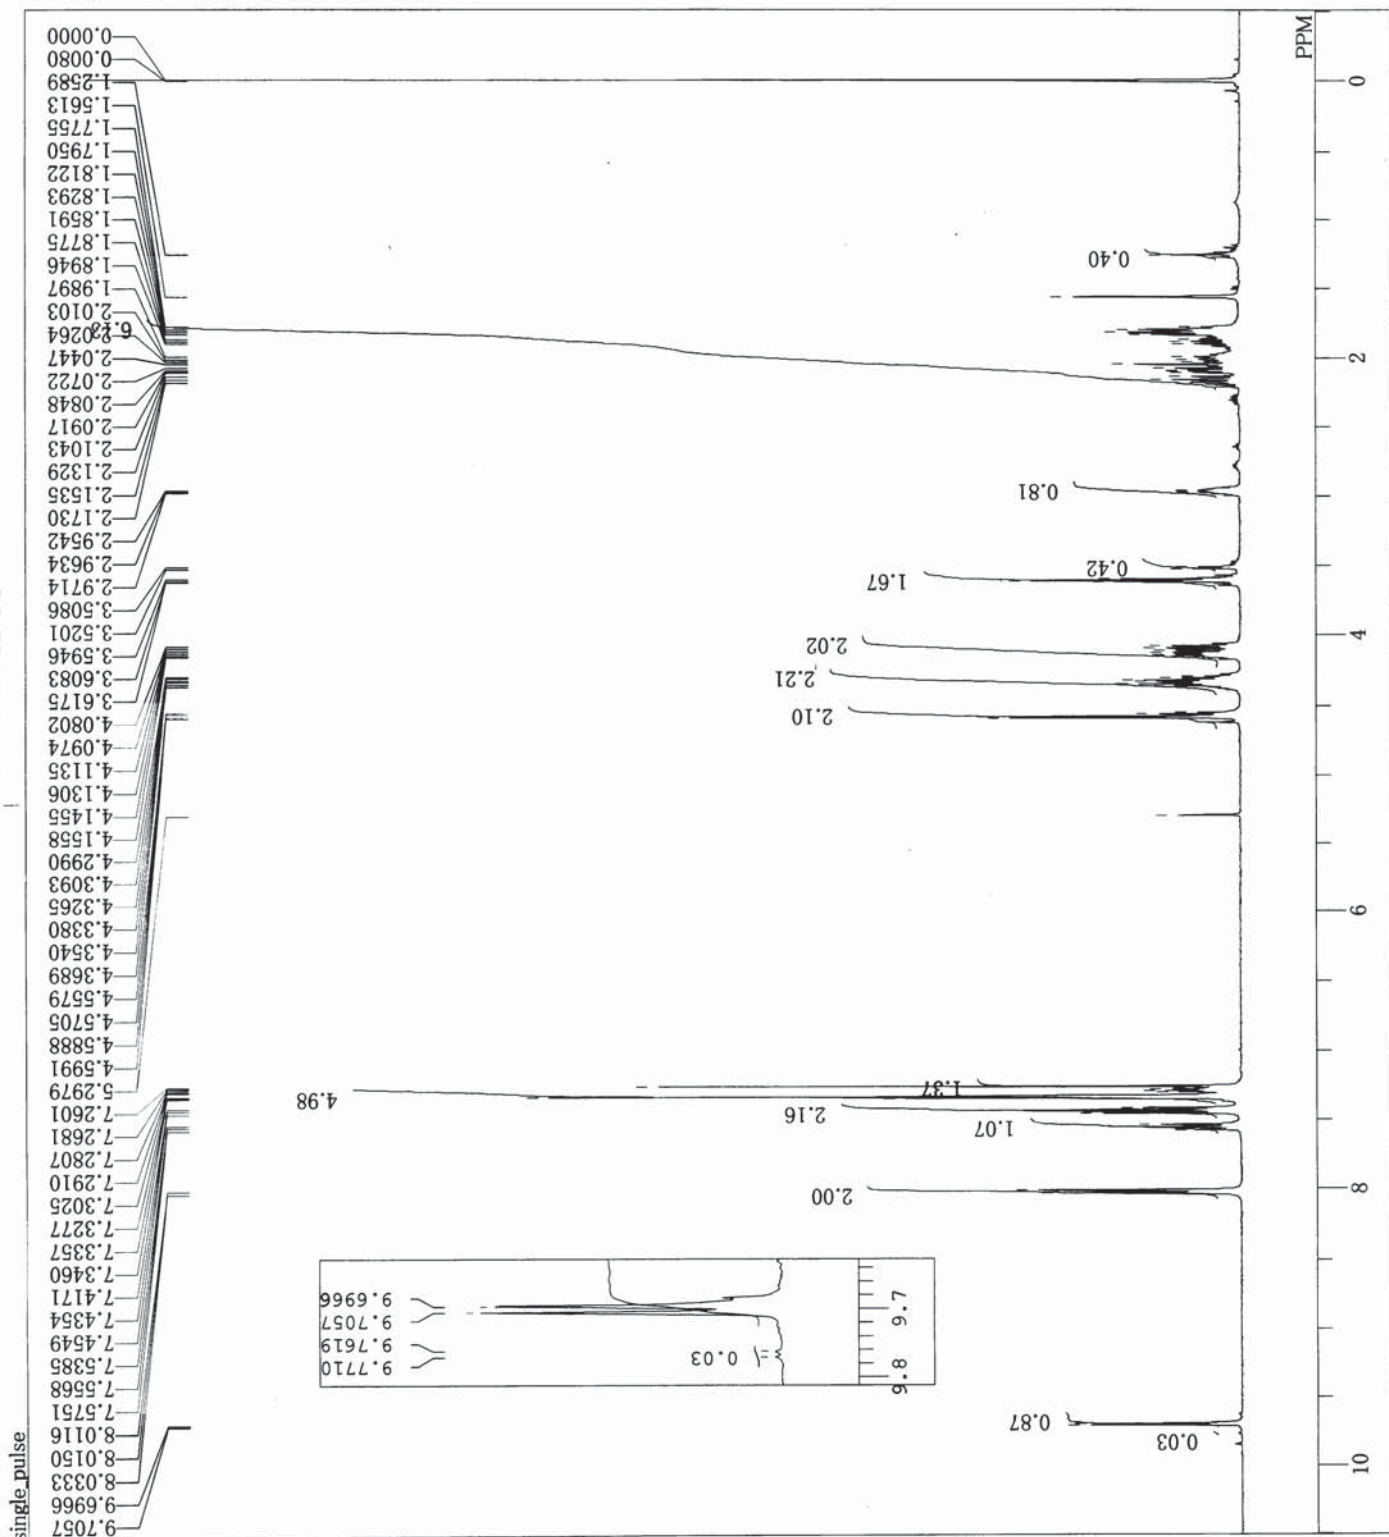



# <sup>13</sup>C NMR of **11**

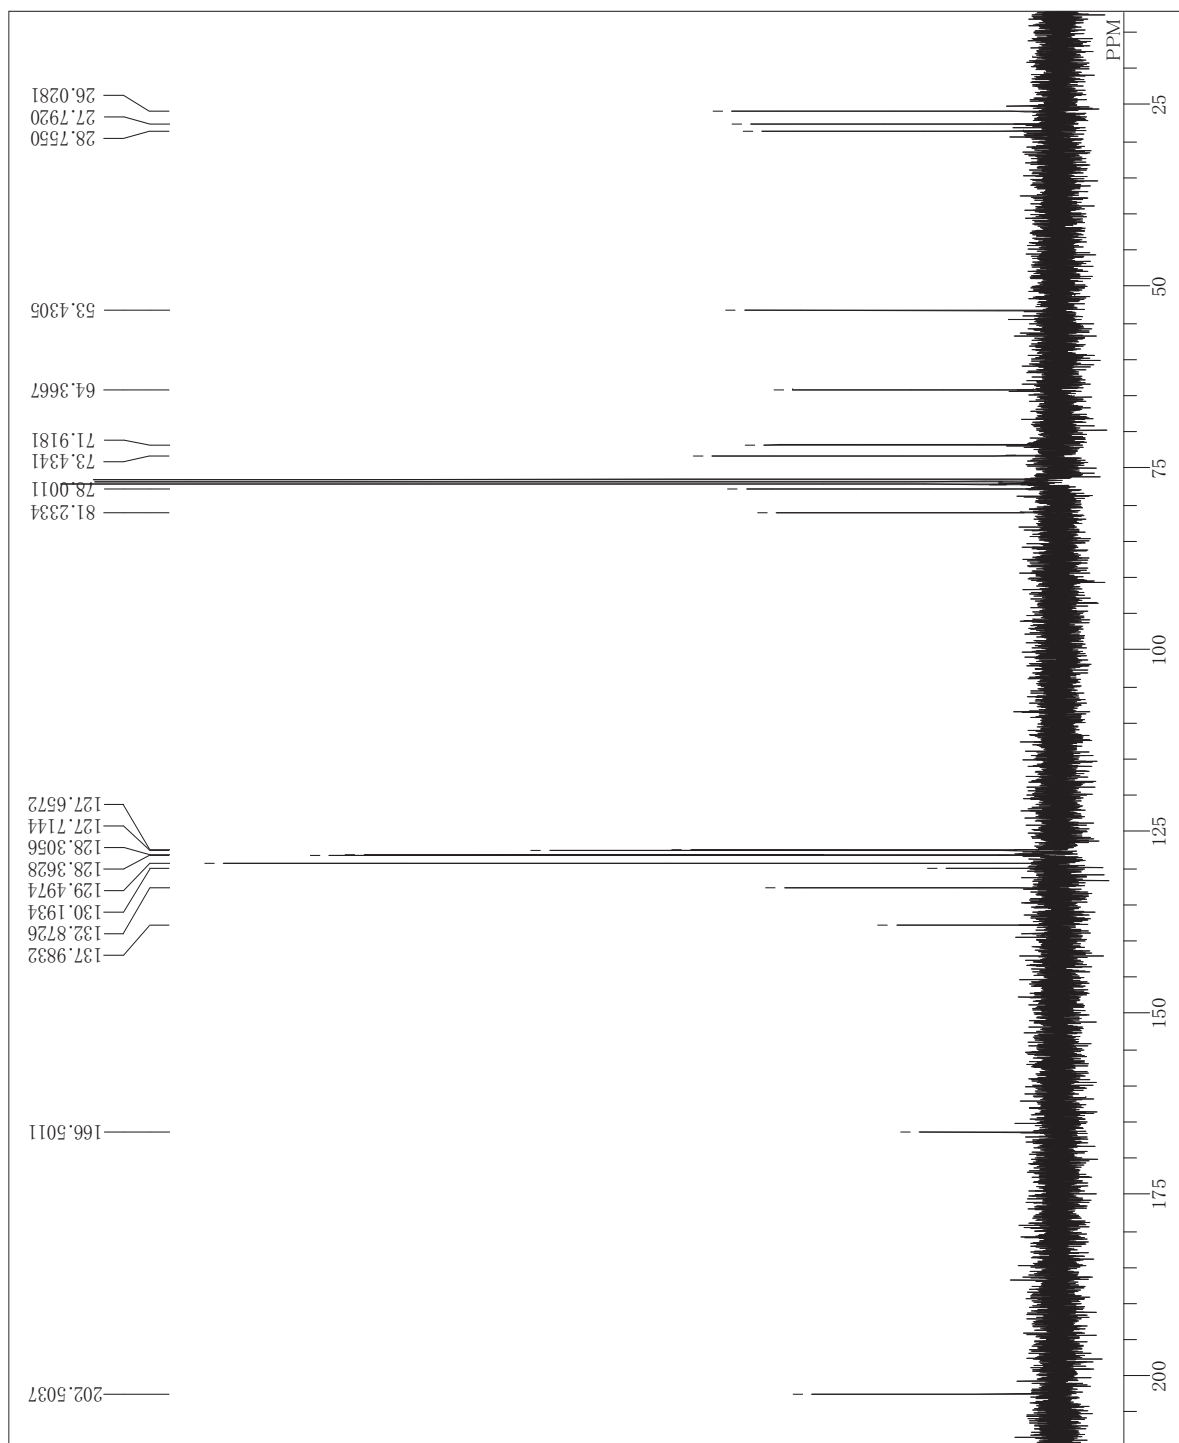

D:FNMR 1D 13C 25125.24 Hz 256.4  
single pulse decoupled gated NOE  
07-01-2011 10:30:23  
13C  
single\_pulse\_dec  
100.53 MHz  
5.35 KHz  
5.86 Hz  
2621.4  
25125.24 Hz  
1.0433 sec  
474  
2.0000 sec  
3.17 usec  
1H 21.9 c  
CDCL3  
77.00 ppm  
0.12 Hz  
60  
RGAIN

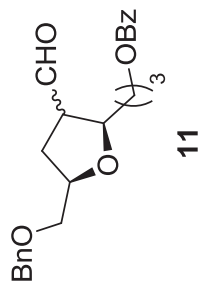

Supplement: c1cc12934a.pdf [file c1cc12934a.pdf]
